# Supplementary material for: Age, growth, mortality and reproductive seasonality of jolthead porgy, Calamus bajonado, from Florida waters
Source: PeerJ. 2017 Sep 8;5:e3774. doi: 10.7717/peerj.3774 (PMC5592901; doi:10.7717/peerj.3774)
Supplement: Supplemental Information 1 — Supplemental datafile for jolthead porgy. Raw data in data tab, unpublished landings referenced in introduction in Landings tab, etc. [file peerj-05-3774-s001.xlsx]

## Sheet: age comparison
															JP_age	Cal_age	average	error	APE
JP_ring	(Multiple Items)														4	4	4	0	0.000548396
															4	4	4	0
Count of JP_edge	Column Labels														4	4	4	0
Row Labels	1	2	3	4	Grand Total										5	5	5	0
1	2	4	15	27	48										6	6	6	0
2	2	5	29	83	119										6	6	6	0
3	10	6	11	102	129										6	6	6	0
4	13	8	7	26	54										7	7	7	0
5	9	1	9	15	34										4	4	4	0
6	3	3	6	5	17										4	4	4	0
7		3	2	2	7										6	6	6	0
8	2	5	6	10	23										5	5	5	0
9	4	2	13	15	34										5	5	5	0
10	2	3	4	7	16										6	6	6	0
11	2	2	8	6	18										5	5	5	0
12	1	2	9	11	23										7	7	7	0
Grand Total	50	44	119	309	522										6	6	6	0
															5	5	5	0
															12	12	12	0
															4	4	4	0
															3	3	3	0
															6	6	6	0
															2	2	2	0
															2	2	2	0
															2	2	2	0
															2	2	2	0
															2	2	2	0
															2	2	2	0
															2	2	2	0
															3	3	3	0
															3	3	3	0
Row Labels	Average of JP_age	Count of JP_age2	StdDev of JP_age3	95% CI											3	3	3	0
0															3	3	3	0
1	1	17	0	0											3	3	3	0
2	2	188	0	0											3	3	3	0
3	3.00775	129	0.0880451	0.0153385											3	3	3	0
4	3.99065	107	0.0966736	0.0185289											3	3	3	0
5	5	39	0	0											3	3	3	0
6	6	19	0	0											3	3	3	0
7	7	12	0	0											4	4	4	0
8	8	5	0	0											4	4	4	0
9	9	1	0	0											4	4	4	0
10	10														4	4	4	0
11	11														4	4	4	0
12	12	2	0	0											5	5	5	0
13	13	1	0	0											5	5	5	0
		520													7	7	7	0
															6	6	6	0
															1	1	1	0
															2	2	2	0
															2	2	2	0
															2	2	2	0
															2	2	2	0
															2	2	2	0
															2	2	2	0
															3	3	3	0
															6	6	6	0
															2	2	2	0
															2	2	2	0
															3	3	3	0
															3	3	3	0
															3	3	3	0
															3	3	3	0
															3	3	3	0
															3	3	3	0
															3	3	3	0
															4	4	4	0
															3	3	3	0
Count of MLB_edge	Column Labels						JP	Column Labels							3	3	3	0
Month	1	2	total	3	4	total3-4		Month	1	2	total1-2	3	4	total3-4	4	4	4	0
1		7	7	24	16	40		1	2	4	6	15	27	42	2	2	2	0
2		13	13	44	62	106		2	2	5	7	29	83	112	3	3	3	0
3	14	17	31	12	84	96		3	10	6	16	11	102	113	3	3	3	0
4	17	8	25	7	21	28		4	13	8	21	7	26	33	3	3	3	0
5	6	16	22	4	9	13		5	9	1	10	9	15	24	3	3	3	0
6	2	9	11	5	1	6		6	3	3	6	6	5	11	3	3	3	0
7		6	6	1		1		7		3	3	2	2	4	3	3	3	0
8		13	13	5	5	10		8	2	5	7	6	10	16	3	3	3	0
9		22	22	12		12		9	4	2	6	13	15	28	2	2	2	0
10		6	6	9	1	10		10	2	3	5	4	7	11	4	4	4	0
11		1	1	15	2	17		11	2	2	4	8	6	14	4	4	4	0
12		4	4	14	5	19		12	1	2	3	9	11	20	6	6	6	0
Grand Total	39	122		152	206			Grand Total	50	44		119	309	522	7	7	7	0
															3	3	3	0
															3	3	3	0
															3	3	3	0
															5	5	5	0
															5	5	5	0
															3	3	3	0
															3	3	3	0
															4	4	4	0
															5	5	5	0
															7	7	7	0
															2	2	2	0
															3	3	3	0
															3	3	3	0
															3	3	3	0
															5	5	5	0
															7	7	7	0
															1	1	1	0
															1	1	1	0
															1	1	1	0
															1	1	1	0
															1	1	1	0
															1	1	1	0
															1	1	1	0
															1	1	1	0
															1	1	1	0
															1	1	1	0
															1	1	1	0
															1	1	1	0
															1	1	1	0
															2	2	2	0
															2	2	2	0
															2	2	2	0
															2	2	2	0
															2	2	2	0
															2	2	2	0
															2	2	2	0
															2	2	2	0
															2	2	2	0
															2	2	2	0
															2	2	2	0
															2	2	2	0
															2	2	2	0
															2	2	2	0
															2	2	2	0
															2	2	2	0
															2	2	2	0
															2	2	2	0
															2	2	2	0
															2	2	2	0
															2	2	2	0
															2	2	2	0
															2	2	2	0
															2	2	2	0
															2	2	2	0
															2	2	2	0
															2	2	2	0
															2	2	2	0
															2	2	2	0
															2	2	2	0
															2	2	2	0
															2	2	2	0
															2	2	2	0
															2	2	2	0
															2	2	2	0
															2	2	2	0
															2	2	2	0
															3	3	3	0
															3	3	3	0
															3	3	3	0
															3	3	3	0
															3	3	3	0
															3	3	3	0
															3	3	3	0
															3	3	3	0
															2	2	2	0
															2	2	2	0
															2	2	2	0
															3	3	3	0
															3	3	3	0
															3	3	3	0
															3	3	3	0
															3	3	3	0
															3	3	3	0
															3	3	3	0
															4	4	4	0
															4	4	4	0
															3	3	3	0
															3	3	3	0
															4	4	4	0
															4	4	4	0
															3	3	3	0
															3	3	3	0
															4	4	4	0
															4	4	4	0
															4	4	4	0
															2	2	2	0
															2	2	2	0
															4	4	4	0
															5	5	5	0
															2	2	2	0
															2	2	2	0
															2	2	2	0
															2	2	2	0
															2	2	2	0
															2	2	2	0
															2	2	2	0
															2	2	2	0
															2	2	2	0
															2	2	2	0
															2	2	2	0
															2	2	2	0
															2	2	2	0
															2	2	2	0
															2	2	2	0
															2	2	2	0
															2	2	2	0
															2	2	2	0
															2	2	2	0
															2	2	2	0
															2	2	2	0
															2	2	2	0
															2	2	2	0
															2	2	2	0
															1	1	1	0
															2	2	2	0
															2	2	2	0
															1	1	1	0
															1	1	1	0
															2	2	2	0
															2	2	2	0
															2	2	2	0
															2	2	2	0
															2	2	2	0
															2	2	2	0
															2	2	2	0
															2	2	2	0
															2	2	2	0
															2	2	2	0
															2	2	2	0
															2	2	2	0
															2	2	2	0
															2	2	2	0
															2	2	2	0
															2	2	2	0
															2	2	2	0
															2	2	2	0
															2	2	2	0
															2	2	2	0
															2	2	2	0
															2	2	2	0
															2	2	2	0
															2	2	2	0
															2	2	2	0
															2	2	2	0
															2	2	2	0
															2	2	2	0
															2	2	2	0
															2	2	2	0
															2	2	2	0
															2	2	2	0
															2	2	2	0
															2	2	2	0
															2	2	2	0
															2	2	2	0
															3	3	3	0
															2	2	2	0
															2	2	2	0
															3	3	3	0
															3	3	3	0
															4	4	4	0
															3	3	3	0
															3	3	3	0
															3	3	3	0
															3	3	3	0
															3	3	3	0
															3	3	3	0
															3	3	3	0
															3	3	3	0
															3	3	3	0
															3	3	3	0
															3	3	3	0
															3	3	3	0
															3	3	3	0
															2	2	2	0
															3	3	3	0
															2	2	2	0
															2	2	2	0
															2	2	2	0
															3	3	3	0
															3	3	3	0
															3	3	3	0
															3	3	3	0
															2	2	2	0
															3	3	3	0
															3	3	3	0
															3	3	3	0
															3	3	3	0
															2	2	2	0
															3	3	3	0
															2	2	2	0
															2	2	2	0
															2	2	2	0
															2	2	2	0
															2	2	2	0
															2	2	2	0
															2	2	2	0
															2	2	2	0
															2	2	2	0
															3	3	3	0
															2	2	2	0
															2	2	2	0
															3	3	3	0
															2	2	2	0
															2	2	2	0
															2	2	2	0
															2	2	2	0
															2	2	2	0
															2	2	2	0
															2	2	2	0
															2	2	2	0
															2	2	2	0
															2	2	2	0
															2	2	2	0
															2	2	2	0
															2	2	2	0
															3	3	3	0
															2	2	2	0
															2	2	2	0
															2	2	2	0
															2	2	2	0
															2	2	2	0
															2	2	2	0
															2	2	2	0
															2	2	2	0
															2	2	2	0
															2	2	2	0
															2	2	2	0
															2	2	2	0
															2	2	2	0
															2	2	2	0
															2	2	2	0
															2	2	2	0
															2	2	2	0
															2	2	2	0
															2	2	2	0
															2	2	2	0
															2	2	2	0
															2	2	2	0
															2	2	2	0
															3	3	3	0
															2	2	2	0
															2	2	2	0
															2	2	2	0
															2	2	2	0
															2	2	2	0
															2	2	2	0
															3	3	3	0
															3	3	3	0
															3	3	3	0
															3	3	3	0
															3	3	3	0
															3	3	3	0
															3	3	3	0
															3	3	3	0
															3	3	3	0
															3	3	3	0
															2	2	2	0
															3	3	3	0
															2	2	2	0
															2	2	2	0
															3	3	3	0
															3	3	3	0
															3	3	3	0
															2	2	2	0
															3	3	3	0
															3	3	3	0
															3	3	3	0
															3	3	3	0
															15	15	15	0
															4	4	4	0
															2	2	2	0
															3	3	3	0
															4	4	4	0
															3	3	3	0
															4	4	4	0
															3	3	3	0
															3	3	3	0
															3	3	3	0
															5	5	5	0
															4	4	4	0
															4	4	4	0
															4	4	4	0
															3	3	3	0
															4	4	4	0
															4	4	4	0
															5	5	5	0
															4	4	4	0
															4	4	4	0
															4	4	4	0
															4	4	4	0
															4	4	4	0
															4	4	4	0
															4	4	4	0
															4	4	4	0
															4	4	4	0
															4	4	4	0
															4	4	4	0
															4	4	4	0
															4	4	4	0
															4	4	4	0
															4	4	4	0
															4	4	4	0
															4	4	4	0
															4	4	4	0
															4	4	4	0
															3	3	3	0
															4	4	4	0
															4	4	4	0
															3	3	3	0
															4	4	4	0
															4	4	4	0
															4	4	4	0
															4	4	4	0
															4	4	4	0
															4	4	4	0
															4	4	4	0
															4	4	4	0
															4	4	4	0
															4	4	4	0
															4	4	4	0
															3	3	3	0
															3	3	3	0
															3	3	3	0
															4	4	4	0
															4	4	4	0
															4	4	4	0
															4	4	4	0
															3	3	3	0
															4	4	4	0
															4	4	4	0
															4	4	4	0
															3	3	3	0
															3	3	3	0
															4	4	4	0
															3	3	3	0
															4	4	4	0
															3	3	3	0
															4	4	4	0
															4	4	4	0
															3	3	3	0
															3	3	3	0
															3	3	3	0
															3	3	3	0
															3	3	3	0
															3	3	3	0
															3	3	3	0
															4	3	3.5	0.142857
															4	4	4	0
															3	4	3.5	0.142857
															3	3	3	0
															3	3	3	0
															4	4	4	0
															4	4	4	0
															4	4	4	0
															4	4	4	0
															4	4	4	0
															5	5	5	0
															5	5	5	0
															5	5	5	0
															5	5	5	0
															5	5	5	0
															5	5	5	0
															4	4	4	0
															5	5	5	0
															4	4	4	0
															4	4	4	0
															4	4	4	0
															4	4	4	0
															4	4	4	0
															5	5	5	0
															5	5	5	0
															4	4	4	0
															4	4	4	0
															4	4	4	0
															5	5	5	0
															4	4	4	0
															4	4	4	0
															5	5	5	0
															5	5	5	0
															5	5	5	0
															5	5	5	0
															4	4	4	0
															4	4	4	0
															5	5	5	0
															5	5	5	0
															4	4	4	0
															4	4	4	0
															4	4	4	0
															4	4	4	0
															4	4	4	0
															4	4	4	0
															4	4	4	0
															4	4	4	0
															4	4	4	0
															5	5	5	0
															5	5	5	0
															5	5	5	0
															5	5	5	0
															5	5	5	0
															5	5	5	0
															5	5	5	0
															5	5	5	0
															6	6	6	0
															4	4	4	0
															5	5	5	0
															6	6	6	0
															4	4	4	0
															6	6	6	0
															7	7	7	0
															7	7	7	0
															7	7	7	0
															7	7	7	0
															6	6	6	0
															6	6	6	0
															6	6	6	0
															6	6	6	0
															7	7	7	0
															8	8	8	0
															7	7	7	0
															8	8	8	0
															6	6	6	0
															8	8	8	0
															8	8	8	0
															8	8	8	0
															9	9	9	0
															12	12	12	0
															13	13	13	0
															6	6	6	0

## Sheet: avgTl@age, STDERR,CV
Row Labels	Average of TL_mm	Count of TL_mm	StdDev of TL_mm2	CV
1	299.741	18	32.4664
2	319.559	235	24.9588
3	369.911	159	35.6292
4	418.057	120	41.7208
5	452.4	46	56.9461
6	491.577	26	54.6649
7	516.778	18	83.6488
8	544.875	8	64.7907
9	522.5	2	67.1751
12	675	2	7.07107
13	680	1	#DIV/0!
15	360	1	#DIV/0!
(blank)	316.999	3	7.21166
Grand Total	377.328	639	74.498
Row Labels	Average of TL_mm	Count of TL_mm	StdDev of TL_mm2	CV
1	299.741	18	32.4664	10.8315
2	319.559	235	24.9588	7.81039
3	369.911	159	35.6292	9.63183
4	418.057	120	41.7208	9.97969
5	452.4	46	56.9461	12.5876
6	491.577	26	54.6649	11.1203
7	516.778	18	83.6488	16.1866
8	544.875	8	64.7907	11.8909
9	522.5	2	67.1751	12.8565
12	675	2	7.07107	1.04757
13	680	1	#DIV/0!

## Sheet: Data
INTERVIEW_ID	TAG_NUMBER	SLIDE_BOX_NO	SLIDE	FL_mm	TL_mm	Wt_g	SEX	JP_ring	JP_edge	JP_age	Year	MONTH	MLB_ring	MLB_edge	MLB_qual	Cal_age	Frac_age	FISHING_MODE_ID	GEAR_CODE	LANDING_AREA_STATE_CODE	AREA_ID	Difference	Agree(Y/N)	Average	error	APE	Gender	Stage	Substage	Gonad_wt	GSI	Alternate tag#
48861	07	JHP_04_Jpa	66	372	430	1200	M	3	4	4	2016	2	3	4	D	4		3	611	12	12	0		3	0		1	2.1	1	1.78	0.148333
49333	18	JHP_05_Jpa	85	360	415	1040	M	3	4	4	2016	3	3	4	C	4		3	611	12	12	0		3	0		1	2.1	1	0.74	0.0711538
49345	66	JHP_06_Jpa	6	370	420	1160	M	3	3	4	2016	4	3	4	D	4		3	611	12	12	0		3	0		1	2.1	1	0.53	0.0456897
48951	13	JHP_05_Jpa	60	350	393	1050	M	4	4	5	2016	5	4	2	D	5		3	611	12	11	0		4	0		1	2.1	1	0.3057	0.0291143
48825	04	JHP_04_Jpa	44	385	445	1300	M	6	1	6	2016	1	5	4	C	6		3	611	12	12	1		5.5	0.0909091		1	2.1	1	0.38	0.0292308
48830	02	JHP_04_Jpa	52	435	497	1830	M	5	3	6	2016	1	5	4	D	6		3	611	12	12	0		5	0		1	2.1	1	1.23	0.0672131
48802	04	JHP_04_Jpa	23	455	527	2260	M	6	3	6	2015	12	6	3	C	6		3	611	12	12	0		6	0		1	2.1	1	1.43	0.0632743
48830	01	JHP_04_Jpa	51	510	585	3140	M	6	3	7	2016	1	6	3	D	7		3	611	12	12	0		6	0		1	2.1	1	2.68	0.0853503
49301	03	JHP_05_Jpa	71	385	440	1300	M	3	4	4	2016	2	3	4	D	4		3	611	12	12	0		3	0		1	2.2	2	2.78	0.213846
49305	10	JHP_05_Jpa	76	397	455	1450	M	3	4	4	2016	3	3	4	D	4		3	611	12	12	0		3	0		1	2.2	2	8.32	0.573793
48870	02	JHP_04_Jpa	74	450	515	2270	M	5	4	6	2016	2	4	4	C	6		3	611	12	12	1		4.5	0.111111		1	2.2	2	4.83	0.212775
48891	18	JHP_05_Jpa	45	455	522	2260	M	4	4	5	2016	2	4	3	C	5		3	611	12	12	0		4	0		1	2.2	2	3.63	0.160619
49344	06	JHP_05_Jpa	89	435	500	1910	M	4	4	5	2016	4	4	4	C	5		3	611	12	12	0		4	0		1	2.2	2	2.92	0.15288
48877	03	JHP_04_Jpa	85	397	462	1600	M	5	3	6	2016	2	5	3	E	6		3	611	12	12	0		5	0		1	2.2	2	5.31	0.331875
49333	35	JHP_05_Jpa	88	417	480	1490	M	5	2	5	2016	3	5	2	C	5		3	611	12	12	0		5	0		1	2.2	2	1.68	0.112752
49333	29	JHP_05_Jpa	87	340	410		M	6	4	7	2016	3	6	2	C	7		3	611	12	12	0		6	0		1	2.2	2	3.42	0.15
49345	82	JHP_06_Jpa	8	427	485	1610	M	5	4	6	2016	4	6	1	C	6		3	611	12	12	-1		5.5	0.0909091		1	2.2	2	1.92	0.119255
49345	21	JHP_06_Jpa	3	482	545	2460	M	5	1	5	2016	4	7	1	C	5		3	611	12	12	-2		6	0.166667		1	2.2	2	2.85	0.115854
49333	13	JHP_05_Jpa	84	590	680	4810	M	12	1	12	2016	3	10	2	C	12		3	611	12	12	2		11	0.0909091		1	2.2	2	10.82	0.224948
48572	19	JHP_05_Jpa	30	279	320	520	M	3	3	4	2016	1	2	3	C	4		3	611	12	11	1		2.5	0.2		1	3.1	1	5.3165	1.0224
48903	08	JHP_05_Jpa	1	245	284	390	M	2	3	3	2016	3	2	4	d	3		3	611	12	11	0		2	0		1	4	1	0.3089	0.0792051
48593	13	JHP_04_Jpa	43	444	490	2020	M	5	3	6	2016	2	5	4	E	6		3	611	12	11	0		5	0		1	4	1	3.2057	0.158698
48584	03	JHP_04_Jpa	39	237	278	350	F	1	4	2	2016	2	1	4	D	2		3	611	12	11	0		1	0		2	2.1	1	0.6574	0.187829
48862	22	JHP_04_Jpa	70	230	272	330	F	1	4	2	2016	2	1	4	C	2		3	611	12	12	0		1	0		2	2.1	1	0.82	0.248485
48909	02	JHP_05_Jpa	5	259	301	440	F	1	4	2	2016	3	1	4	B	2		3	611	12	11	0		1	0		2	2.1	1	0.7381	0.16775
48920	02	JHP_05_Jpa	8	271	313	480	F	1	4	2	2016	3	1	4	C	2		3	611	12	11	0		1	0		2	2.1	1	1.0247	0.213479
48586	19	JHP_05_Jpa	34	268	304	460	F	1	4	2	2016	2	1	4	E	2		3	611	12	11	0		1	0		2	2.1	1	0.6555	0.1425
48590	07	JHP_05_Jpa	36	272	316	510	F	1	4	2	2016	2	1	3	C	2		3	611	12	11	0		1	0		2	2.1	1	1.5443	0.302804
49300	11	JHP_05_Jpa	70	240	285	390	F	1	4	2	2016	2	1	4	D	2		3	611	12	12	0		1	0		2	2.1	1	0.52	0.133333
48826	08	JHP_04_Jpa	48	290	345	570	F	2	4	3	2016	1	2	4	D	3		3	611	12	12	0		2	0		2	2.1	1	1.18	0.207018
48839	12	JHP_04_Jpa	54	350	400	940	F	2	4	3	2016	1	2	4	C	3		3	611	12	12	0		2	0		2	2.1	1	2.32	0.246809
48842	21	JHP_04_Jpa	55	325	380	780	F	2	4	3	2016	1	2	3	D	3		3	611	12	12	0		2	0		2	2.1	1	1.86	0.238462
48866	13	JHP_04_Jpa	72	287	342	660	F	2	4	3	2016	2	2	3	D	3		3	611	12	12	0		2	0		2	2.1	1	2.02	0.306061
48878	05	JHP_04_Jpa	87	322	380	770	F	2	4	3	2016	2	2	3	C	3		3	611	12	12	0		2	0		2	2.1	1	1.64	0.212987
48909	01	JHP_05_Jpa	4	280	325	540	F	2	4	3	2016	3	2	4	D	3		3	611	12	11	0		2	0		2	2.1	1	1.0826	0.200481
48930	16	JHP_05_Jpa	12	320	357	730	F	2	4	3	2016	4	2	4	B	3		3	611	12	11	0		2	0		2	2.1	1	2.5149	0.344507
48568	15	JHP_05_Jpa	29	296	345		F	2	4	3	2016	1	2	3	B	3		3	611	12	11	0		2	0		2	2.1	1	1.4112	#DIV/0!
48949	12	JHP_05_Jpa	57	329	377	840	F	2	3	3	2016	5	2	1	D	3		3	611	12	11	0		2	0		2	2.1	1	2.0623	0.245512
49301	09	JHP_05_Jpa	73	302	352	630	F	2	4	3	2016	2	2	4	D	3		3	611	12	12	0		2	0		2	2.1	1	1.72	0.273016
48826	09	JHP_04_Jpa	49	370	415	1130	F	3	4	4	2016	1	3	3	D	4		3	611	12	12	0		3	0		2	2.1	1	1.97	0.174336
48850	05	JHP_04_Jpa	59	290	342	660	F	3	3	4	2016	1	3	3	D	4		3	611	12	12	0		3	0		2	2.1	1	2.02	0.306061
48949	19	JHP_05_Jpa	58	347	395	970	F	3	3	4	2016	5	3	2	E	4		3	611	12	11	0		3	0		2	2.1	1	2.0444	0.210763
48806	04	JHP_04_Jpa	28	392	452	1320	F	4	2	4	2015	12	4	2	D	4		3	611	12	12	0		4	0		2	2.1	2	3.42	0.259091
48806	05	JHP_04_Jpa	29	355	415	1040	F	4	2	4	2015	12	4	2	D	4		3	611	12	12	0		4	0		2	2.1	2	2.92	0.280769
48839	08	JHP_04_Jpa	53	392	452	1540	F	4	4	5	2016	1	4	4	D	5		3	611	12	12	0		4	0		2	2.1	1	3.86	0.250649
48492	08	JHP_04_Jpa	7	340	405	1060	F	5	1	5	2015	11	5	3	D	5		3	611	12	12	0		5	0		2	2.1	1	2.34	0.220755
48806	06	JHP_04_Jpa	30	385	445	1290	F	7	3	7	2015	12	5	3	D	7		3	611	12	12	2		6	0.166667		2	2.1	2	3.94	0.305426
48808	08	JHP_04_Jpa	31	385	445	1330	F	6	1	6	2015	12	5	3	D	6		3	611	12	12	1		5.5	0.0909091		2	2.1	1	4.48	0.336842
48558	04	JHP_04_Jpa	22	300	349	670	F	1	4	1	2015	12	1	4	C	1		3	611	12	11	0		1	0		2	2.2	2	2.8939	0.431925
48857	25	JHP_04_Jpa	63	250	300	400	F	1	4	2	2016	1	1	4	C	2		3	611	12	12	0		1	0		2	2.2	2	1.52	0.38
48866	16	JHP_04_Jpa	73	267	310	460	F	1	4	2	2016	2	1	4	D	2		3	611	12	12	0		1	0		2	2.2	2	1.96	0.426087
48876	32	JHP_04_Jpa	83	280	325	520	F	1	4	2	2016	2	1	4	D	2		3	611	12	12	0		1	0		2	2.2	2	2.49	0.478846
48598	09	JHP_05_Jpa	39	270	321	490	F	2	2	2	2016	2	1	4	C	2		3	611	12	11	1		1.5	0.333333		2	2.2	2	1.5384	0.313959
49300	06	JHP_05_Jpa	69	260	315	430	F	1	4	2	2016	2	1	4	D	2		3	611	12	12	0		1	0		2	2.2	2	0.56	0.130233
48576	14	JHP_04_Jpa	38	302	337		F	2	2	2	2016	1	2	3	C	2		3	611	12	11	0		2	0		2	2.2	2	1.6992	#DIV/0!
48592	06	JHP_04_Jpa	40	310	359	690	F	2	4	3	2016	2	2	3	D	3		3	611	12	11	0		2	0		2	2.2	2	2.6213	0.379899
49345	04	JHP_05_Jpa	90	372	432	1180	F	5	4	6	2016	4	6	1	D	6		3	611	12	12	-1		5.5	0.0909091		2	2.2	2	3.38	0.286441
48878	07	JHP_04_Jpa	89	267	320	500	F	1	4	2	2016	2	1	4	D	2		3	611	12	12	0		1	0		2	3.1	1	2.81	0.562
48897	23	JHP_05_Jpa	53	270	317	450	F	1	4	2	2016	2	1	4	D	2		3	611	12	12	0		1	0		2	3.1	1	1.67	0.371111
48861	08	JHP_04_Jpa	67	330	387	920	F	2	4	3	2016	2	2	4	D	3		3	611	12	12	0		2	0		2	3.1	1	3.96	0.430435
49330	01	JHP_05_Jpa	83	320	375	820	F	2	4	3	2016	3	2	4	C	3		3	611	12	12	0		2	0		2	3.1	1	6.37	0.776829
49345	17	JHP_06_Jpa	2	340	397	880	F	2	3	3	2016	4	2	4	B	3		3	611	12	12	0		2	0		2	3.1	1	5.97	0.678409
48891	34	JHP_05_Jpa	47	285	312	600	F	2	4	3	2016	2	3	3	C	3		3	611	12	12	-1		2.5	0.2		2	3.1	1	2.11	0.351667
48873	12	JHP_04_Jpa	77	295	350	630	F	2	4	3	2016	2	2	4	E	3		3	611	12	12	0		2	0		2	3.2	2	6.47	1.02698
48876	06	JHP_04_Jpa	81	347	400	1070	F	2	4	3	2016	2	2	4	D	3		3	611	12	12	0		2	0		2	3.2	2	19.53	1.82523
48878	06	JHP_04_Jpa	88	322	370	850	F	2	4	3	2016	2	2	4	D	3		3	611	12	12	0		2	0		2	3.2	2	12.25	1.44118
48826	36	JHP_04_Jpa	50	337	402	880	F	3	4	4	2016	1	3	3	C	4		3	611	12	12	0		3	0		2	3.2	2	11.62	1.32045
48850	08	JHP_04_Jpa	61	350	415	1040	F	3	2	3	2016	1	3	3	D	3		3	611	12	12	0		3	0		2	3.2	2	15.54	1.49423
48893	05	JHP_05_Jpa	50	330	377	790	F	2	4	3	2016	2	2	3	D	3		3	611	12	12	0		2	0		2	4	0	11.03	1.3962
48893	09	JHP_05_Jpa	51	327	375	740	F	3	4	4	2016	2	2	3	B	4		3	611	12	12	1		2.5	0.2		2	4	0	10.1	1.36486
48806	03	JHP_04_Jpa	27	322	380	820	F	2	4	2	2015	12	2	4	C	2		3	611	12	12	0		2	0		2	4.1	1	11.96	1.45854
48593	12	JHP_04_Jpa	42	321	370	870	F	2	4	3	2016	2	2	4	E	3		3	611	12	11	0		2	0		2	4.1	1	12.5538	1.44297
48870	33	JHP_04_Jpa	75	310	360	660	F	2	3	3	2016	2	2	3	D	3		3	611	12	12	0		2	0		2	4.1	1	9.91	1.50152
48905	04	JHP_05_Jpa	3	274	316	530	F	2	4	3	2016	3	2	4	D	3		3	611	12	11	0		2	0		2	4.1	1	9.6294	1.81687
48581	08	JHP_05_Jpa	32	334	391	920	F	2	4	3	2016	2	2	3	C	3		3	611	12	11	0		2	0		2	4.1	1	9.9801	1.08479
48598	08	JHP_05_Jpa	38	305	356	680	F	2	4	3	2016	2	2	4	C	3		3	611	12	11	0		2	0		2	4.1	1	9.8145	1.44331
48891	15	JHP_05_Jpa	43	275	315	490	F	2	4	3	2016	2	2	4	D	3		3	611	12	12	0		2	0		2	4.1	1	9.23	1.88367
48891	22	JHP_05_Jpa	46	290	335	590	F	3	1	3	2016	2	2	4	C	3		3	611	12	12	1		2.5	0.2		2	4.1	1	8.89	1.50678
49323	10	JHP_05_Jpa	82	290	342	560	F	2	2	2	2016	3	2	2	C	2		3	611	12	12	0		2	0		2	4.1	1	8.02	1.43214
48842	29	JHP_04_Jpa	56	320	375	760	F	3	3	4	2016	1	3	3	D	4		3	611	12	12	0		3	0		2	4.1	1	7.25	0.953947
48587	05	JHP_05_Jpa	35	395	445	1450	F	3	4	4	2016	2	3	4	C	4		3	611	12	11	0		3	0		2	4.1	1	17.9789	1.23992
48850	07	JHP_04_Jpa	60	320	380	790	F	5	4	6	2016	1	5	3	E	6		3	611	12	12	0		5	0		2	4.1	1	13.82	1.74937
48877	04	JHP_04_Jpa	86	385	445	1300	F	6	3	7	2016	2	5	4	D	7		3	611	12	12	1		5.5	0.0909091		2	4.1	1	28.57	2.19769
48891	14	JHP_05_Jpa	42	315	375	810	F	2	4	3	2016	2	2	4	C	3		3	611	12	12	0		2	0		2	4.2	2	23.21	2.86543
48891	35	JHP_05_Jpa	48	295	345	620	F	2	4	3	2016	2	2	4	D	3		3	611	12	12	0		2	0		2	4.2	2	17.18	2.77097
48893	03	JHP_05_Jpa	49	355	412	1050	F	2	4	3	2016	2	2	3	D	3		3	611	12	12	0		2	0		2	4.2	2	34.02	3.24
48861	10	JHP_04_Jpa	69	330	387	920	F	4	4	5	2016	2	4	3	C	5		3	611	12	12	0		4	0		2	4.2	2	22.03	2.39457
48583	18	JHP_05_Jpa	33	421	449	1810	F	4	4	5	2016	2	4	4	D	5		3	611	12	11	0		4	0		2	4.2	2	46.665	2.57818
49305	04	JHP_05_Jpa	75	302	352	650	F	2	4	3	2016	3	2	4	D	3		3	611	12	12	0		2	0		2	4.3	3	23.08	3.55077
48850	09	JHP_04_Jpa	62	307	365	520	F	3	2	3	2016	1	3	2	D	3		3	611	12	12	0		3	0		2	4.3	3	17.87	3.43654
47411	06	JHP_01_Jpa		264	311		M				2015	2						3	611	12	12
48915	21	JHP_05_Jpa	6	307	352	680	F	3	4	4	2016	3	3	4	D	4		3	611	12	11	0		3	0		2	4.3	3	27.958	4.11147
49305	11	JHP_05_Jpa	77	356	411	1080	F	4	4	5	2016	3	4	4	D	5		3	611	12	12	0		4	0		2	4.3	3	38.08	3.52593
49333	23	JHP_05_Jpa	86	547	605	3800	F	6	3	7	2016	3	7	1	D	7		3	611	12	12	-1		6.5	0.0769231		2	4.3	3	133.14	3.50368
48957	06	JHP_05_Jpa	67	300	351	630	F	2	1	2	2016	5	2	2	B	2		3	611	12	11	0		2	0		2	6	0	0.7192	0.114159
49354	02	JHP_06_Jpa	12	332	390	880	F	2	3	3	2016	4	2	2	C	3		3	611	12	12	0		2	0		2	6	0	1.52	0.172727
49345	23	JHP_06_Jpa	4	375	430	1270	F	3	2	3	2016	4	3	2	C	3		3	611	12	12	0		3	0		2	6	0	1.59	0.125197
49345	67	JHP_06_Jpa	7	400	465	1370	F	3	2	3	2016	4	3	3	C	3		3	611	12	12	0		3	0		2	6	0	1.52	0.110949
49345	85	JHP_06_Jpa	9	350	407	960	F	4	3	5	2016	4	4	2	C	5		3	611	12	12	0		4	0		2	6	0	0.92	0.0958333
48961	01	JHP_05_Jpa	68	394	461	1530	M	6	3	7	2016	5	6	2	D	7		3	611	12	11	0		6	0		2	6	0	0.6862	0.0448497
48442	07	JHP_03_Jpa	69	230	270	290	F	1	4	1	2015	10	1	3	C	1		3	611	12	12	0		1	0		2	7	0	0.5	0.172414
48444	09	JHP_03_Jpa	71	215	255	240	F	1	4	1	2015	10	1	3	D	1		3	611	12	12	0		1	0		2	7	0	0.2	0.0833333
48448	02	JHP_03_Jpa	74	382	322	530	U	1	4	1	2015	10	1	4	D	1		3	611	12	12	0		1	0		2	7	0	1.24	0.233962
48450	02	JHP_03_Jpa	76	327	375	820	F	1	4	1	2015	10	1	3	B	1		3	611	12	12	0		1	0		2	7	0	1.24	0.15122
48480	03	JHP_03_Jpa	87	235	275	330	F	1	4	1	2015	11	1	3	C	1		3	611	12	12	0		1	0		2	7	0	0.32	0.0969697
48480	09	JHP_03_Jpa	88	237	282	330	F	1	3	1	2015	11	1	3	B	1		3	611	12	12	0		1	0		2	7	0	0.46	0.139394
48480	10	JHP_03_Jpa	89	260	305	430	F	1	3	1	2015	11	1	3	C	1		3	611	12	12	0		1	0		2	7	0	0.63	0.146512
48480	11	JHP_03_Jpa	90	265	310	450	F	1	3	1	2015	11	1	3	D	1		3	611	12	12	0		1	0		2	7	0	0.68	0.151111
48487	04	JHP_04_Jpa	3	247	290	360	F	1	4	1	2015	11	1	4	C	1		3	611	12	12	0		1	0		2	7	0	0.46	0.127778
48487	16	JHP_04_Jpa	5	255	297	420	F	1	4	1	2015	11	1	3	C	1		3	611	12	12	0		1	0		2	7	0	0.42	0.1
48487	52	JHP_04_Jpa	6	237	280	330	F	1	4	1	2015	11	1	4	C	1		3	611	12	12	0		1	0		2	7	0	0.39	0.118182
48812	15	JHP_04_Jpa	33	280	332	580	F	1	4	1	2015	12	1	4	D	1		3	611	12	12	0		1	0		2	7	0	0.62	0.106897
48813	01	JHP_04_Jpa	35	245	290	440	F	1	4	1	2015	12	1	4	B	1		3	611	12	12	0		1	0		2	7	0	0.46	0.104545
48858	15	JHP_04_Jpa	64	265	305	460	F	1	4	2	2016	1	1	3	C	2		3	611	12	12	0		1	0		2	7	0	0.57	0.123913
48866	08	JHP_04_Jpa	71	250	297	390	F	1	4	2	2016	2	1	3	D	2		3	611	12	12	0		1	0		2	7	0	0.52	0.133333
48873	13	JHP_04_Jpa	78	270	317	540	F	1	4	2	2016	2	1	4	D	2		3	611	12	12	0		1	0		2	7	1	0.74	0.137037
48876	05	JHP_04_Jpa	80	255	302	390	F	1	4	2	2016	2	1	4	D	2		3	611	12	12	0		1	0		2	7	0	0.73	0.187179
48901	09	JHP_04_Jpa	90	251	293	390	F	1	4	2	2016	3	1	4	D	2		3	611	12	11	0		1	0		2	7	1	0.6122	0.156974
48904	01	JHP_05_Jpa	2	224	256	280	F	1	4	2	2016	3	1	4	C	2		3	611	12	11	0		1	0		2	7	0	0.3763	0.134393
48920	05	JHP_05_Jpa	9	254	299	410	F	1	4	2	2016	3	1	4	C	2		3	611	12	11	0		1	0		2	7	0	0.3906	0.0952683
48940	07	JHP_05_Jpa	13	260	305	440	F	1	4	2	2016	4	1	4	B	2		3	611	12	11	0		1	0		2	7	0	0.3079	0.0699773
48595	02	JHP_05_Jpa	37	236	280	340	F	1	4	2	2016	2	1	4	D	2		3	611	12	11	0		1	0		2	7	0	0.4489	0.132029
48897	01	JHP_05_Jpa	52	270	320	470	F	1	4	2	2016	2	1	4	C	2		3	611	12	12	0		1	0		2	7	0	0.52	0.110638
48941	19	JHP_05_Jpa	54	263	304	460	F	1	4	2	2016	5	1	4	D	2		3	611	12	11	0		1	0		2	7	0	0.3503	0.0761522
48944	11	JHP_05_Jpa	55	268	313	490	F	1	4	2	2016	5	1	4	D	2		3	611	12	11	0		1	0		2	7	0	0.4816	0.0982857
48951	06	JHP_05_Jpa	59	257	304	440	F	1	4	2	2016	5	1	4	C	2		3	611	12	11	0		1	0		2	7	0	0.4362	0.0991364
48953	05	JHP_05_Jpa	63	297	340	690	F	1	4	2	2016	5	1	4	D	2		3	611	12	11	0		1	0		2	7	0	0.6179	0.0895507
49304	01	JHP_05_Jpa	74	285	330	490	F	1	4	2	2016	3	1	4	C	2		3	611	12	12	0		1	0		2	7	0	0.66	0.134694
49321	14	JHP_05_Jpa	81	245	292	380	F	1	4	2	2016	3	1	4	C	2		3	611	12	12	0		1	0		2	7	0	0.86	0.226316
49347	08	JHP_06_Jpa	10	240	287	350	F	1	3	2	2016	4	1	4	B	2		3	611	12	12	0		1	0		2	7	0	1.03	0.183929
49358	03	JHP_06_Jpa	13	262	307	440	F	1	4	2	2016	4	1	4	E	2		3	611	12	12	0		1	0		2	7	0	0.42	0.0954545
49358	04	JHP_06_Jpa	14	285	332	530	F	1	4	2	2016	4	1	4	D	2		3	611	12	12	0		1	0		2	7	0	0.56	0.10566
49361	04	JHP_06_Jpa	15	280	325	530	F	1	4	2	2016	4	1	4	C	2		3	611	12	12	0		1	0		2	7	0	0.45	0.0849057
48449	01	JHP_03_Jpa	75	325	377	860	F	2	3	2	2015	10	2	2	C	2		3	611	12	12	0		2	0		2	7	0	1.36	0.15814
48457	02	JHP_03_Jpa	77	285	330	520	F	2	1	2	2015	10	2	2	C	2		3	611	12	12	0		2	0		2	7	0	1.26	0.242308
48457	03	JHP_03_Jpa	78	305	355	730	F	2	3	2	2015	10	2	3	C	2		3	611	12	12	0		2	0		2	7	0	1.24	0.169863
48457	04	JHP_03_Jpa	79	282	325	500	F	2	2	2	2015	10	2	2	C	2		3	611	12	12	0		2	0		2	7	0	0.86	0.172
47732	18	JHP_02_Jpa	47	275	325	500	F	2	2	2	2015	3			A			3	611	12	12
48464	05	JHP_03_Jpa	81	277	325	510	F	2	4	2	2015	10	2	3	D	2		3	611	12	12	0		2	0		2	7	0	0.88	0.172549
48473	22	JHP_03_Jpa	85	312	385	890	F	2	2	2	2015	11	2	3	D	2		3	611	12	12	0		2	0		2	7	0	1.92	0.21573
48474	03	JHP_03_Jpa	86	305	355		F	2	4	2	2015	11	2	3	D	2		3	611	12	12	0		2	0		2	7	0	1.64	#DIV/0!
48484	05	JHP_04_Jpa	1	312	365	710	F	2	3	2	2015	11	2	3	D	2		3	611	12	12	0		2	0		2	7	0	1.46	0.205634
48486	10	JHP_04_Jpa	2	287	330	530	F	2	3	2	2015	11	2	3	D	2		3	611	12	12	0		2	0		2	7	0	0.53	0.1
48487	15	JHP_04_Jpa	4	305	345	640	F	2	3	2	2015	11	2	3	C	2		3	611	12	12	0		2	0		2	7	0	1.13	0.176562
48496	06	JHP_04_Jpa	8	297	345	640	F	2	3	2	2015	11	2	3	C	2		3	611	12	11	0		2	0		2	7	0	0.84	0.13125
48498	07	JHP_04_Jpa	9	275	345	600	F	2	3	2	2015	12	2	3	C	2		3	611	12	12	0		2	0		2	7	0	0.98	0.163333
48558	03	JHP_04_Jpa	21	246	283	350	F	2	4	2	2015	12	2	3	C	2		3	611	12	11	0		2	0		2	7	0	0.8146	0.232743
48803	04	JHP_04_Jpa	24	295	347	630	F	2	3	2	2015	12	2	3	D	2		3	611	12	12	0		2	0		2	7	0	1.32	0.209524
48812	14	JHP_04_Jpa	32	285	335	600	F	2	4	2	2015	12	2	3	D	2		3	611	12	12	0		2	0		2	7	0	1.15	0.191667
48812	16	JHP_04_Jpa	34	290	345	640	F	2	3	2	2015	12	2	3	D	2		3	611	12	12	0		2	0		2	7	0	1.67	0.260937
48815	06	JHP_04_Jpa	36	322	375	770	F	2	3	2	2015	12	2	3	D	2		3	611	12	12	0		2	0		2	7	0	1.26	0.163636
48826	05	JHP_04_Jpa	46	310	365	720	F	2	4	3	2016	1	2	3	C	3		3	611	12	12	0		2	0		2	7	0	1.26	0.175
48826	07	JHP_04_Jpa	47	305	360	700	F	2	4	3	2016	1	2	4	C	3		3	611	12	12	0		2	0		2	7	0	1.46	0.208571
48850	03	JHP_04_Jpa	58	335	395	970	F	2	4	3	2016	1	2	3	D	3		3	611	12	12	0		2	0		2	7	0	2.18	0.224742
48858	27	JHP_04_Jpa	65	280	320	540	F	2	4	3	2016	1	2	3	D	3		3	611	12	12	0		2	0		2	7	0	0.7	0.12963
48873	01	JHP_04_Jpa	76	297	347	610	F	2	3	3	2016	2	2	3	D	3		3	611	12	12	0		2	0		2	7	0	1.86	0.304918
48876	22	JHP_04_Jpa	82	307	360	640	F	2	4	3	2016	2	2	4	D	3		3	611	12	12	0		2	0		2	7	0	1.46	0.228125
48926	01	JHP_05_Jpa	11	325	380	860	F	2	4	3	2016	4	2	4	C	3		3	611	12	11	0		2	0		2	7	1	0.282	0.0327907
48888	18	JHP_05_Jpa	41	355	410	1060	F	2	4	3	2016	2	2	4	C	3		3	611	12	12	0		2	0		2	7	0	1.87	0.176415
48948	10	JHP_05_Jpa	56	269	310	460	F	1	4	2	2016	5	2	1	D	2		3	611	12	11	-1		1.5	0.333333		2	7	0	0.2185	0.0475
48952	09	JHP_05_Jpa	62	278	327	530	F	2	1	2	2016	5	2	1	C	2		3	611	12	11	0		2	0		2	7	0	0.6581	0.12417
48953	08	JHP_05_Jpa	64	276	317	460	F	2	1	2	2016	5	2	1	C	2		3	611	12	11	0		2	0		2	7	0	0.3138	0.0682174
49301	04	JHP_05_Jpa	72	315	370	680	F	2	4	3	2016	2	2	3	C	3		3	611	12	12	0		2	0		2	7	0	1.14	0.167647
49345	65	JHP_06_Jpa	5	330	380	880	F	2	4	3	2016	4	2	4	C	3		3	611	12	12	0		2	0		2	7	0	0.92	0.104545
49347	09	JHP_06_Jpa	11	295	350	560	F	2	3	3	2016	4	2	3	D	3		3	611	12	12	0		2	0		2	7	0	0.82	0.234286
48443	50	JHP_03_Jpa	70	310	362	770	F	3	2	3	2015	10	3	2	C	3		3	611	12	12	0		3	0		2	7	0	0.88	0.114286
48444	11	JHP_03_Jpa	72	355	395	990	F	3	4	3	2015	10	3	2	D	3		3	611	12	12	0		3	0		2	7	0	1.3	0.131313
48447	01	JHP_03_Jpa	73	362	402	1020	F	3	3	3	2015	10	3	2	E	3		3	611	12	12	0		3	0		2	7	0	1.42	0.139216
48461	12	JHP_03_Jpa	80	295	345	690	F	3	2	3	2015	10	3	3	D	3		3	611	12	12	0		3	0		2	7	0	1.47	0.213043
48464	07	JHP_03_Jpa	82	380	440	1270	F	4	1	4	2015	10	3	3	C	4		3	611	12	12	1		3.5	0.142857		2	7	0	2.85	0.224409
48473	15	JHP_03_Jpa	84	310	397	950	F	4	1	4	2015	11	3	3	D	4		3	611	12	12	1		3.5	0.142857		2	7	0	1.86	0.195789
48551	15	JHP_04_Jpa	20	369	413		F	3	4	3	2015	12	3	3	D	3		3	611	12	11	0		3	0		2	7	0
48806	01	JHP_04_Jpa	25	355	412	1100	F	3	4	3	2015	12	3	2	C	3		3	611	12	12	0		3	0		2	7	0	2.22	0.201818
48826	04	JHP_04_Jpa	45	347	410	950	F	3	4	4	2016	1	3	3	D	4		3	611	12	12	0		3	0		2	7	0	2.41	0.253684
48875	43	JHP_04_Jpa	79	330	387	970	F	3	3	4	2016	2	3	4	E	4		3	611	12	12	0		3	0		2	7	0	2.76	0.284536
48920	01	JHP_05_Jpa	7	273	316	520	F	3	1	3	2016	3	3	1	D	3		3	611	12	11	0		3	0		2	7	0	0.4954	0.0952692
48922	11	JHP_05_Jpa	10	320	365	810	F	2	4	3	2016	3	3	1	C	3		3	611	12	11	-1		2.5	0.2		2	7	0	0.944	0.116543
48884	02	JHP_05_Jpa	40	302	357	740	F	3	4	4	2016	2	3	4	C	4		3	611	12	12	0		3	0		2	7	0	1.16	0.156757
48467	08	JHP_03_Jpa	83	375	445	1220	F	4	2	4	2015	11	4	2	D	4		3	611	12	12	0		4	0		2	7	0	2.23	0.182787
48806	02	JHP_04_Jpa	26	342	395	970	F	4	3	4	2015	12	4	3	D	4		3	611	12	12	0		4	0		2	7	0	0.98	0.101031
48876	44	JHP_04_Jpa	84	280	325	530	M	1	4	2	2016	2	1	4	C	2		3	611	12	12	0		1	0		3			2.06	0.388679
48891	17	JHP_05_Jpa	44	302	347	660	M	1	4	2	2016	2	1	4	E	2		3	611	12	12	0		1	0		3			1.57	0.237879
48861	09	JHP_04_Jpa	68	375	427	1240	M	3	4	4	2016	2	3	4	D	4		3	611	12	12	0		3	0		3		0	2.09	0.168548
49345	14	JHP_06_Jpa	1	417	480	1660	M	4	4	5	2016	4	6	1	D	5		3	611	12	12	-2		5	0.2		3			1.13	0.0680723
47355	05	JHP_01_Jpa	1	251	289	390	F	1	4	2	2015	2	1	3	b	2		3	611	12	11	0	y	1	0	2.13837
47363	07	JHP_01_Jpa	3	266	309	450	F	1	3	2	2015	2	1	4	c	2		3	611	12	11	0	y	1	0
47363	09	JHP_01_Jpa	4	223	260	250	F	1	4	2	2015	2	1	4	c	2		3	611	12	11	0	y	1	0
47414	17	JHP_01_Jpa	15	282	332		U	1	4	2	2015	3	1	3	c	2		3	611	12	12	0	y	1	0
47422	10	JHP_01_Jpa	21	263	310		U	1	4	2	2015	4	1	4	b	2		3	611	12	12	0	y	1	0
47422	12	JHP_01_Jpa	23	252	299		U	1	4	2	2015	4	1	4	c	2		3	611	12	12	0	y	1	0
47429	06	JHP_01_Jpa	27	250	295	355	F	1	4	2	2015	6	1	3	b	2		3	611	12	12	0	y	1	0
47560	01	JHP_01_Jpa	32	262	302	410	F	1	4	2	2015	1	1	4	c	2		3	611	12	12	0	y	1	0
47560	91	JHP_01_Jpa	33	250	295	450	F	1	4	2	2015	1	1	4	c	2		3	611	12	12	0	y	1	0
47599	15	JHP_02_Jpa	8	277	325	570	F	1	4	2	2015	2	1	4	C	2		3	611	12	12	0		1	0
47706	10	JHP_02_Jpa	20	250	290	370	F	1	4	2	2015	3	1	4	C	2		3	611	12	12	0		1	0
47708	02	JHP_02_Jpa	25	287	335	570	F	1	4	2	2015	3	1	4	B	2		3	611	12	12	0		1	0
47708	22	JHP_02_Jpa	26	275	320	530	F	1	4	2	2015	3	1	4	C	2		3	611	12	12	0		1	0
47728	17	JHP_02_Jpa	41	270	315	460	F	1	4	2	2015	3	1	4	C	2		3	611	12	12	0		1	0
47733	06	JHP_02_Jpa	49	290	347	590	F	1	4	2	2015	3	1	4	C	2		3	611	12	12	0		1	0
47736	03	JHP_02_Jpa	50	272	320	490	F	1	4	2	2015	4	1	4	B	2		3	611	12	12	0		1	0
47741	02	JHP_02_Jpa	58	272	315	450	F	1	4	2	2015	4	1	4	C	2		3	611	12	12	0		1	0
47741	09	JHP_02_Jpa	59	280	325	510	F	2	1	2	2015	4	1	3	C	2		3	611	12	12	1		1.5	0.333333
47743	10	JHP_02_Jpa	62	255	302	510	F	2	1	2	2015	4	1	4	B	2		3	611	12	12	1		1.5	0.333333
47746	12	JHP_02_Jpa	66	245	282	480	F	2	1	2	2015	4	1	4	C	2		3	611	12	12	1		1.5	0.333333
47746	40	JHP_02_Jpa	69	275	320	550	F	1	4	2	2015	4	1	4	C	2		3	611	12	12	0		1	0
47783	20	JHP_02_Jpa	73	305	352	590	F	2	2	2	2015	5	1	4	B	2		3	611	12	12	1		1.5	0.333333
47789	09	JHP_02_Jpa	75	290	337	590	F	2	1	2	2015	5	1	4	C	2		3	611	12	12	1		1.5	0.333333
47808	05	JHP_02_Jpa	90	283	331		F	2	1	2	2015	4	1	4	C	2		3	611	12	11	1		1.5	0.333333
48408	17	JHP_03_Jpa	51	252	297	400	F	1	4	1	2015	8	1	3	D	1		3	611	12	12	0		1	0
48564	27	JHP_04_Jpa	37	244	289		U	1	4	2	2016	1	1	4	D	2		3	611	12	11	0		1	0
48847	16	JHP_04_Jpa	57	270	320		F	1	4	2	2016	1	1	4	C	2		3	611	12	12	0		1	0
FL1573620151129001	KY1500843	JHP_05_Jpa	14	223	250		M	1	3	1	2015	11	1	3	B	1		2	610	12	748	0		1	0
	20151832089	JHP_05_Jpa	18	241	284.336	370		1	4	1	2015	9	1	2	D	1		CM HL		FL	12	0		1	0
48577	10	JHP_05_Jpa	31	247	286	360	F	1	4	2	2016	1	1	4	D	2		3	611	12	11	0		1	0
48954	28	JHP_05_Jpa	66	254	301		F	1	4	2	2016	5	1	4	C	2		3	611	12	11	0		1	0
49314	06	JHP_05_Jpa	78	260	317	440	F	1	4	2	2016	3	1	4	C	2		3	611	12	12	0		1	0
20161830197		JHP_06_Jpa	17	269	314.996	500		1	4	2	2016	3	1	4	C	2		CM	611	12	12	0		1	0
20161830198		JHP_06_Jpa	18	257	301.856	460		1	3	2	2016	3	1	4	C	2		CM	611	12	12	0		1	0
20161830199		JHP_06_Jpa	19	241	284.336	370		1	4	2	2016	3	1	4	D	2		CM	611	12	12	0		1	0
20161830200		JHP_06_Jpa	20	260	305.141	430		1	4	2	2016	3	1	4	D	2		CM	611	12	12	0		1	0
20161830201		JHP_06_Jpa	21	256	300.761	460		1	4	2	2016	3	1	4	D	2		CM	611	12	12	0		1	0
20161830202		JHP_06_Jpa	22	251	295.286	420		1	4	2	2016	3	1	4	D	2		CM	611	12	12	0		1	0
20161830203		JHP_06_Jpa	23	271	317.186	510		1	4	2	2016	3	1	4	E	2		CM	611	12	12	0		1	0
20161830204		JHP_06_Jpa	24	272	318.281	540		1	4	2	2016	3	1	4	D	2		CM	611	12	12	0		1	0
20161830205		JHP_06_Jpa	25	251	295.286	430		1	4	2	2016	3	1	4	E	2		CM	611	12	12	0		1	0
20161830206		JHP_06_Jpa	26	268	313.901	520		1	4	2	2016	3	1	4	D	2		CM	611	12	12	0		1	0
20161830207		JHP_06_Jpa	27	265	310.616	480		1	4	2	2016	3	1	4	D	2		CM	611	12	12	0		1	0
20161830208		JHP_06_Jpa	28	256	300.761	460		1	4	2	2016	3	1	4	C	2		CM	611	12	12	0		1	0
20161830270		JHP_06_Jpa	39	263	308.426	470		1	4	2	2016	3	1	3	C	2		CM	612	12	12	0		1	0
20161830275		JHP_06_Jpa	41	275	321.566	480		1	4	2	2016	3	1	4	E	2		CM	612	12	12	0		1	0
20161830276		JHP_06_Jpa	42	246	289.811	380		1	4	2	2016	3	1	4	D	2		CM	612	12	12	0		1	0
20161830277		JHP_06_Jpa	43	281	328.136	500		1	4	2	2016	3	1	4	D	2		CM	612	12	12	0		1	0
20161830278		JHP_06_Jpa	44	250	294.191	410		1	4	2	2016	3	1	4	D	2		CM	612	12	12	0		1	0
20161830279		JHP_06_Jpa	45	262	307.331	480		1	4	2	2016	3	1	4	D	2		CM	612	12	12	0		1	0
20161830280		JHP_06_Jpa	46	267	312.806	520		1	4	2	2016	3	1	4	C	2		CM	612	12	12	0		1	0
20161830281		JHP_06_Jpa	47	274	320.471	540		1	4	2	2016	3	1	4	C	2		CM	612	12	12	0		1	0
20161830460		JHP_06_Jpa	49	276	322.661	510		1	4	2	2016	3	1	4	D	2		CM	612	12	11	0		1	0
20161830461		JHP_06_Jpa	50	261	306.236	450		1	4	2	2016	3	1	4	D	2		CM	612	12	11	0		1	0
20161830462		JHP_06_Jpa	51	248	292.001	400		1	4	2	2016	3	1	4	D	2		CM	612	12	11	0		1	0
20161830463		JHP_06_Jpa	52	274	320.471	550		1	4	2	2016	3	1	4	D	2		CM	612	12	11	0		1	0
20161830465		JHP_06_Jpa	53	260	305.141	480		1	3	2	2016	3	1	3	C	2		CM	612	12	11	0		1	0
20161830466		JHP_06_Jpa	54	265	310.616	470		1	4	2	2016	3	1	4	C	2		CM	612	12	11	0		1	0
20161830468		JHP_06_Jpa	56	276	322.661	510		1	4	2	2016	3	1	4	E	2		CM	612	12	11	0		1	0
20161830469		JHP_06_Jpa	57	259	304.046	450		1	4	2	2016	3	1	4	C	2		CM	612	12	11	0		1	0
20161830470		JHP_06_Jpa	58	288	335.801	540		1	4	2	2016	3	1	4	D	2		CM	612	12	11	0		1	0
20161830471		JHP_06_Jpa	59	289	336.896	610		2	1	2	2016	3	1	4	D	2		CM	612	12	11	1		1.5	0.333333
20161830473		JHP_06_Jpa	61	255	299.666	390		1	4	2	2016	3	1	4	D	2		CM	612	12	11	0		1	0
20161830497		JHP_06_Jpa	62	248	292.001			1	4	2	2016	3	1	4	D	2		CM	989	12	11	0		1	0
49715	19	JHP_07_Jpa	30	220	252	340	F				2016	5	1	4	D	2		3	611	12	12
49720	01	JHP_07_Jpa	33	295	382	500	F				2016	5	1	4	C	2		3	611	12	11
49733	14	JHP_07_Jpa	42	260	305		F				2016	6	1	4	C	2		3	611	12	12
49750	05	JHP_07_Jpa	51	280	304	510	F				2016	6	1	4	C	2		3	611	12	12
49750	08	JHP_07_Jpa	54	270	325	550	F				2016	6	1	4	C	2		3	611	12	12
49754	03	JHP_07_Jpa	55	270	325	490	F				2016	6	1	4	B	2		3	611	12	11
49821	06	JHP_07_Jpa	71	294	332	640	F				2016	8	1	4	C	1		3	611	12	11
47357	21	JHP_01_Jpa	2	248	290	380	F	1	4	2	2015	2	2	4	b	2		3	611	12	11	-1	n	1.5	0.333333
47373	11	JHP_01_Jpa	5	271	310		M	2	4	3	2015	3	2	4	d	3		3	611	12	11	0	y	2	0
47379	06	JHP_01_Jpa	7	261	309	430	F	1	4	2	2015	3	2	2	d	2		3	611	12	11	-1	n	1.5	0.333333
47414	18	JHP_01_Jpa	16	256	306		U	1	4	2	2015	3	2	2	c	2		3	611	12	12	-1	n	1.5	0.333333
47422	14	JHP_01_Jpa	25	310	363		U	2	4	3	2015	4	2	4	d	3		3	611	12	12	0	y	2	0
47563	48	JHP_01_Jpa	43	255	300	390	F	2	4	3	2015	1	2	4	c	3		3	611	12	12	0	y	2	0
47583	06	JHP_01_Jpa	54	387	445	1370	M	3	4	4	2015	2	2	4	c	4		3	611	12	12	1	n	2.5	0.2
47583	15	JHP_01_Jpa	63	365	420	1140	F	2	4	3	2015	2	2	3	D	3		3	611	12	12	0		2	0
47583	18	JHP_01_Jpa	65	362	415	1200	F	2	4	3	2015	2	2	4	E	3		3	611	12	12	0		2	0
47583	22	JHP_01_Jpa	69	315	365	810	F	2	3	3	2015	2	2	3	C	3		3	611	12	12	0		2	0
47589	41	JHP_01_Jpa	81	357	402	1110	F	2	4	3	2015	2	2	4	D	3		3	611	12	12	0		2	0
47590	11	JHP_01_Jpa	86	327	375	860	F	2	4	3	2015	2	2	4	D	3		3	611	12	12	0		2	0
47591	28	JHP_01_Jpa	89	330	385	920	F	2	4	3	2015	2	2	4	C	3		3	611	12	12	0		2	0
47599	07	JHP_02_Jpa	4	340	380	940	F	2	4	3	2015	2	2	4	C	3		3	611	12	12	0		2	0
47599	10	JHP_02_Jpa	5	337	390	920	F	2	4	3	2015	2	2	3	C	3		3	611	12	12	0		2	0
47599	11	JHP_02_Jpa	6	340	395	950	M	2	4	3	2015	2	2	4	C	3		3	611	12	12	0		2	0
47599	12	JHP_02_Jpa	7	320	370	800	M	2	3	3	2015	2	2	3	D	3		3	611	12	12	0		2	0
47599	17	JHP_02_Jpa	10	332	385	890	F	2	4	3	2015	2	2	3	D	3		3	611	12	12	0		2	0
47599	19	JHP_02_Jpa	12	335	385	900	F	2	4	3	2015	2	2	4	D	3		3	611	12	12	0		2	0
47599	22	JHP_02_Jpa	15	365	420		F	2	3	3	2015	2	2	4	C	3		3	611	12	12	0		2	0
47705	03	JHP_02_Jpa	18	265	310	500	F	1	4	2	2015	3	2	4	C	2		3	611	12	11	-1		1.5	0.333333
47706	11	JHP_02_Jpa	21	320	375	770	F	2	4	3	2015	3	2	4	D	3		3	611	12	12	0		2	0
47706	18	JHP_02_Jpa	22	280	325	550	F	2	1	2	2015	3	2	1	D	2		3	611	12	12	0		2	0
47708	99	JHP_02_Jpa	27	260	310	470	F	2	1	2	2015	3	2	1	C	2		3	611	12	12	0		2	0
47711	18	JHP_02_Jpa	28	197	235	200	F	2	1	2	2015	3	2	2	C	2		3	611	12	12	0		2	0
47714	13	JHP_02_Jpa	33	325	375	820	F	2	4	3	2015	3	2	4	D	3		3	611	12	12	0		2	0
47716	38	JHP_02_Jpa	34	310	370	740	F	2	4	3	2015	3	2	4	E	3		3	611	12	12	0		2	0
47718	12	JHP_02_Jpa	35	365	420	1090	F	2	4	3	2015	3	2	4	D	3		3	611	12	12	0		2	0
47727	01	JHP_02_Jpa	39	302	355	710	M	2	4	3	2015	3	2	3	D	3		3	611	12	12	0		2	0
47727	18	JHP_02_Jpa	40	260	305	510	F	2	1	2	2015	3	2	1	C	2		3	611	12	12	0		2	0
47728	18	JHP_02_Jpa	42	322	377	670	F	2	4	3	2015	3	2	2	C	3		3	611	12	12	0		2	0
47728	21	JHP_02_Jpa	43	290	340	630	F	2	4	3	2015	3	2	3	D	3		3	611	12	12	0		2	0
47728	24	JHP_02_Jpa	44	282	335	590	F	2	3	3	2015	3	2	2	E	3		3	611	12	12	0		2	0
47730	09	JHP_02_Jpa	46	342	397	950	F	3	1	3	2015	3	2	4	C	3		3	611	12	12	1		2.5	0.2
47732	31	JHP_02_Jpa	48	282	330	540	F	2	2	2	2015	2	2	4	C	2		3	611	12	12	0		2	0
47736	04	JHP_02_Jpa	51	330	382	770	F	2	3	3	2015	4	2	3	D	3		3	611	12	12	0		2	0
47740	15	JHP_02_Jpa	53	260	305	430	F	2	2	2	2015	4	2	1	D	2		3	611	12	12	0		2	0
47740	16	JHP_02_Jpa	54	260	302	410	F	2	1	2	2015	4	2	1	D	2		3	611	12	12	0		2	0
47740	17	JHP_02_Jpa	55	290	337	550	F	2	1	2	2015	4	2	1	B	2		3	611	12	12	0		2	0
47740	19	JHP_02_Jpa	56	272	320	450	F	2	2	2	2015	4	2	1	C	2		3	611	12	12	0		2	0
47741	01	JHP_02_Jpa	57	255	290	410	F	2	1	2	2015	4	2	1	B	2		3	611	12	12	0		2	0
47741	38	JHP_02_Jpa	60	262	305	390	F	2	1	2	2015	4	2	1	C	2		3	611	12	12	0		2	0
47743	04	JHP_02_Jpa	61	267	310	550	F	2	2	2	2015	4	2	1	C	2		3	611	12	12	0		2	0
47746	04	JHP_02_Jpa	65	262	305	510	F	2	1	2	2015	4	2	1	D	2		3	611	12	12	0		2	0
47746	13	JHP_02_Jpa	67	255	305	480	F	2	1	2	2015	4	2	1	D	2		3	611	12	12	0		2	0
47792	11	JHP_02_Jpa	78	350	400	1020	F	2	4	3	2015	5	2	3	C	3		3	611	12	12	0		2	0
47795	05	JHP_02_Jpa	85	270	317	450	F	2	1	2	2015	5	2	1	D	2		3	611	12	12	0		2	0
47795	06	JHP_02_Jpa	86	270	317	460	F	2	1	2	2015	5	2	2	D	2		3	611	12	12	0		2	0
47795	36	JHP_02_Jpa	87	270	312	440	F	2	4	3	2015	5	2	4	D	3		3	611	12	12	0		2	0
47845	14	JHP_03_Jpa	2	285	325		F	2	2	2	2015	6	2	2	C	2		3	611	12	11	0		2	0
47848	18	JHP_03_Jpa	3	285	323		F	2	1	2	2015	6	2	2	C	2		3	611	12	11	0		2	0
47856	20	JHP_03_Jpa	4	284	324	560	F	2	3	2	2015	7	2	2	D	2		3	611	12	11	0		2	0
47862	06	JHP_03_Jpa	6	283	316	560	F	2	2	2	2015	7	2	2	D	2		3	611	12	11	0		2	0
47863	13	JHP_03_Jpa	7	293	342	620	F	2	3	2	2015	7	2	2	D	2		3	611	12	11	0		2	0
47864	11	JHP_03_Jpa	8	288	327	590	F	2	4	2	2015	7	2	2	D	2		3	611	12	11	0		2	0
47868	12	JHP_03_Jpa	9	354	405	960	F	2	4	2	2015	7	2	3	D	2		3	611	12	11	0		2	0
47872	05	JHP_03_Jpa	10	302	356	690	F	2	2	2	2015	8	2	2	C	2		3	611	12	11	0		2	0
47876	18	JHP_03_Jpa	12	286	333.611	560	F	2	2	2	2015	8	2	2	D	2		3	611	12	11	0		2	0
47877	17	JHP_03_Jpa	13	286	332	560	F	2	3	2	2015	8	2	2	D	2		3	611	12	11	0		2	0
47895	07	JHP_03_Jpa	17	251	291	400	F	2	3	2	2015	9	2	2	D	2		3	611	12	11	0		2	0					0.4
47898	09	JHP_03_Jpa	18	290	338	620	F	2	3	2	2015	9	2	3	D	2		3	611	12	11	0		2	0					1.3
48035	05	JHP_03_Jpa	24	285	337		F	2	2	2	2015	6	2	2	D	2		3	611	12	12	0		2	0
48039	02	JHP_03_Jpa	28	305	357	690	F	2	3	3	2015	6	2	4	C	3		3	611	12	12	0		2	0
48039	05	JHP_03_Jpa	29	257	305	430	F	2	1	2	2015	6	2	1	C	2		3	611	12	12	0		2	0
48039	08	JHP_03_Jpa	30	262	305	390	U	2	2	2	2015	6	2	2	C	2		3	611	12	12	0		2	0
48061	01	JHP_03_Jpa	34	317	365	740	F	2	2	2	2015	7	2	2	D	2		3	611	12	12	0		2	0
48079	50	JHP_03_Jpa	37	285	330	530	F	2	4	2	2015	8	2	2	D	2		3	611	12	11	0		2	0
48093	01	JHP_03_Jpa	43	267	295	500	F	2	4	2	2015	8	2	4	C	2		3	611	12	12	0		2	0
48093	02	JHP_03_Jpa	44	255	295	400	F	2	3	2	2015	8	2	2	C	2		3	611	12	12	0		2	0
48093	06	JHP_03_Jpa	45	345	380	850	F	2	3	2	2015	8	2	3	C	2		3	611	12	12	0		2	0
48093	09	JHP_03_Jpa	46	252	295	410	F	2	3	2	2015	8	2	4	D	2		3	611	12	12	0		2	0
48093	28	JHP_03_Jpa	48	280	330	560	F	2	3	2	2015	8	2	3	D	2		3	611	12	12	0		2	0
48093	29	JHP_03_Jpa	49	272	315	580	F	2	3	2	2015	8	2	2	D	2		3	611	12	12	0		2	0
48400	14	JHP_03_Jpa	50	295	347		F	2	2	2	2015	8	2	2	D	2		3	611	12	12	0		2	0
48418	02	JHP_03_Jpa	52	290	340	580	F	2	3	2	2015	9	2	3	D	2		3	611	12	12	0		2	0
48437	30	JHP_03_Jpa	68	320	365	800	F	2	3	2	2015	9	2	2	C	2		3	611	12	12	0		2	0
48498	08	JHP_04_Jpa	10	255	310	410	U	2	3	2	2015	12	2	3	D	2		3	611	12	12	0		2	0
48505	01	JHP_04_Jpa	11	290	332	610	F	2	4	2	2015	9	2	3	C	2		3	611	12	11	0		2	0					0.6622
48505	02	JHP_04_Jpa	12	304	354	650	F	2	3	2	2015	9	2	2	D	2		3	611	12	11	0		2	0					0.7784
48511	13	JHP_04_Jpa	13	303	352	740	F	2	3	2	2015	10	2	3	D	2		3	611	12	11	0		2	0
48516	16	JHP_04_Jpa	14	292	339	600	F	2	4	2	2015	10	2	3	D	2		3	611	12	11	0		2	0
48534	07	JHP_04_Jpa	15	281	322	580	F	2	4	2	2015	11	2	3	D	2		3	611	12	11	0		2	0
48544	03	JHP_04_Jpa	16	281	323	560	F	2	4	2	2015	12	2	4	D	2		3	611	12	11	0		2	0					0.574
48545	17	JHP_04_Jpa	17	286	329	540	F	2	3	2	2015	12	2	3	D	2		3	611	12	11	0		2	0					1.027
48546	08	JHP_04_Jpa	18	329	367	740	F	2	4	2	2015	12	2	3	C	2		3	611	12	11	0		2	0					0.8936
48549	17	JHP_04_Jpa	19	301	347		F	2	4	2	2015	12	2	2	D	2		3	611	12	11	0		2	0
48592	21	JHP_04_Jpa	41	306	351		F	2	4	3	2016	2	2	4	D	3		3	611	12	11	0		2	0
	20151832086	JHP_05_Jpa	15	266	311.711	500		2	3	2	2015	9	2	2	C	2		CM HL	611	FL	12	0		2	0
	20151832087	JHP_05_Jpa	16	296	344.561	680		2	4	2	2015	9	2	3	D	2		CM HL	611	FL	12	0		2	0
	20151832088	JHP_05_Jpa	17	278	324.851	620		2	3	2	2015	9	2	2	C	2		CM HL		FL	12	0		2	0
	20151832090	JHP_05_Jpa	19	289	336.896	500		2	3	2	2015	9	2	2	C	2		CM HL		FL	12	0		2	0
	20151832091	JHP_05_Jpa	20	304	353.321	700		2	4	2	2015	9	2	2	E	2		CM HL		FL	12	0		2	0
48951	34	JHP_05_Jpa	61	256	290		F	2	1	2	2016	5	2	2	C	2		3	611	12	11	0		2	0
49317	22	JHP_05_Jpa	79	290	340	530	F	2	4	3	2016	3	2	4	C	3		3	611	12	12	0		2	0
20161830196		JHP_06_Jpa	16	283	330.326	620		2	3	3	2016	3	2	4	C	3		CM	611	12	12	0		2	0
20161830209		JHP_06_Jpa	29	302	351.131	780		2	3	3	2016	3	2	3	C	3		CM	611	12	12	0		2	0
20161830210		JHP_06_Jpa	30	327	378.506	970		2	4	3	2016	3	2	4	D	3		CM	611	12	12	0		2	0
20161830211		JHP_06_Jpa	31	342	394.931	1050		2	4	3	2016	3	2	4	D	3		CM	611	12	12	0		2	0
20161830212		JHP_06_Jpa	32	306	355.511	740		2	4	3	2016	3	2	4	C	3		CM	611	12	12	0		2	0
20161830213		JHP_06_Jpa	33	331	382.886	960		2	4	3	2016	3	2	4	D	3		CM	611	12	12	0		2	0
20161830214		JHP_06_Jpa	34	313	363.176	790		2	4	3	2016	3	2	4	B	3		CM	611	12	12	0		2	0
20161830215		JHP_06_Jpa	35	312	362.081	790		2	4	3	2016	3	2	3	C	3		CM	611	12	12	0		2	0
20161830267		JHP_06_Jpa	36	301	350.036	690		2	4	3	2016	3	2	4	C	3		CM	612	12	12	0		2	0
20161830269		JHP_06_Jpa	38	257	301.856	430		1	4	2	2016	3	2	1	C	2		CM	612	12	12	-1		1.5	0.333333
20161830274		JHP_06_Jpa	40	306	355.511	800		2	4	3	2016	3	2	4	D	3		CM	612	12	12	0		2	0
20161830459		JHP_06_Jpa	48	285	332.516	580		1	4	2	2016	3	2	1	C	2		CM	612	12	11	-1		1.5	0.333333
20161830472		JHP_06_Jpa	60	245	288.716	390		2	1	2	2016	3	2	1	D	2		CM	612	12	11	0		2	0
20161830498		JHP_06_Jpa	63	324	375.221	830		2	4	3	2016	3	2	4	E	3		CM	989	12	11	0		2	0
20161830501		JHP_06_Jpa	66	316	366.461	770		2	4	3	2016	3	2	4	D	3		CM	989	12	11	0		2	0
20161830502		JHP_06_Jpa	67	311	360.986	800		2	4	3	2016	3	2	4	C	3		CM	989	12	11	0		2	0
20161830503		JHP_06_Jpa	68	293	341.276	610		1	4	2	2016	3	2	1	D	2		CM	989	12	11	-1		1.5	0.333333
20161830504		JHP_06_Jpa	69	304	353.321	720		2	4	3	2016	3	2	4	D	3		CM	989	12	11	0		2	0
20161830505		JHP_06_Jpa	70	297	345.656	640		2	4	3	2016	3	2	4	D	3		CM	989	12	11	0		2	0
20161830506		JHP_06_Jpa	71	314	364.271			2	4	3	2016	3	2	4	F	3		CM	989	12	11	0		2	0
20161830507		JHP_06_Jpa	72	309	358.796	780		2	4	3	2016	3	2	4	D	3		CM	989	12	11	0		2	0
48970	20	JHP_06_Jpa	78	362	423	1290	F				2016	6	2	4	C	3		3	611	12	11
48973	02	JHP_06_Jpa	79	274	315	510	F				2016	6	2	3	C	3		3	611	12	11
48981	07	JHP_06_Jpa	81	295	345		U				2016	6	2	2	D	2		3	611	12	11											TQ1600740
48983	05	JHP_06_Jpa	82	289	332	650	F				2016	7	2	2	C	7		3	611	12	11
48986	03	JHP_06_Jpa	86	269	317	520	F				2016	7	2	2	C	2		3	611	12	11
48999	01	JHP_07_Jpa	1	266	317	460	F				2016	7	2	2	C	2		3	611	12	11
48999	12	JHP_07_Jpa	2	264	303	410	F				2016	7	2	2	C	2		3	611	12	11
48999	16	JHP_07_Jpa	3	293	344		F				2016	7	2	3	C	2		3	611	12	11
48999	17	JHP_07_Jpa	4	281	322		F				2016	7	2	2	D	2		3	611	12	11
49368	23	JHP_07_Jpa	8	385	445	1370	F				2016	4	2	4	D	3		3	611	12	12
49370	14	JHP_07_Jpa	13	330	385	790	F				2016	4	2	3	C	3		3	611	12	12
49373	19	JHP_07_Jpa	14	307	375	780	F				2016	4	2	4	E	3		3	611	12	12
49395	28	JHP_07_Jpa	16	316	360	660	F				2016	5	2	4	C	3		3	611	12	12
49395	29	JHP_07_Jpa	17	265	305	420	F				2016	5	2	1	C	2		3	611	12	12
49712	04	JHP_07_Jpa	28	307	357	680	F				2016	5	2	4	C	3		3	611	12	12
49717	01	JHP_07_Jpa	32	277	382		F				2016	5	2	4	C	3		3	611	12	12
49722	14	JHP_07_Jpa	35	280	327	520	F				2016	5	2	2	C	2		3	611	12	12
49731	05	JHP_07_Jpa	37	305	355	720	F				2016	6	2	4	C	3		3	611	12	12
48371	21	JHP_05_Jpa	28	327	360	790	M	14	4	15	2016	5	14	3	E	15		3	611	45	5	0		14	0
49731	07	JHP_07_Jpa	38	305	350	680	F				2016	6	2	4	C	3		3	611	12	12
49731	10	JHP_07_Jpa	40	292	340	580	F				2016	6	2	2	C	2		3	611	12	12
49733	13	JHP_07_Jpa	41	295	346		F				2016	6	2	2	C	2		3	611	12	12
49735	04	JHP_07_Jpa	43	247	292	410	F				2016	6	2	1	C	2		3	611	12	12
49735	06	JHP_07_Jpa	45	255	295	410	F				2016	6	2	2	D	2		3	611	12	12
49712	13	JHP_07_Jpa	46	240	287	420	F				2016	5	2	1	C	2		3	611	12	12
49750	04	JHP_07_Jpa	50	275	328	530	F				2016	6	2	2	B	2		3	611	12	12
49750	06	JHP_07_Jpa	52	285	304	530	F				2016	6	2	2	C	2		3	611	12	12
49750	07	JHP_07_Jpa	53	263	312	410	F				2016	6	2	1	C	2		3	611	12	12
49768	05	JHP_07_Jpa	56	287	342	520	F				2016	7	2	2	C	2		3	611	12	12
49800	04	JHP_07_Jpa	57	307	348	770	F				2016	7	2	2	C	2		3	611	12	11
49802	49	JHP_07_Jpa	58	270	313		F				2016	7	2	2	D	2		3	611	12	11											TQ1600920
49803	03	JHP_07_Jpa	59	269	311	490	F				2016	8	2	2	D	2		3	611	12	11											TQ1600923
49803	04	JHP_07_Jpa	60	292	347	590	F				2016	8	2	2	C	2		3	611	12	11
49807	20	JHP_07_Jpa	63	306	355		F				2016	8	2	4	D	2		3	611	12	11
49809	05	JHP_07_Jpa	64	288	317	600	F				2016	8	2	2	D	2		3	611	12	11
49814	02	JHP_07_Jpa	66	284	316	530	F				2016	8	2	2	B	2		3	611	12	11
49814	05	JHP_07_Jpa	67	272	314	550	F				2016	8	2	3	C	2		3	611	12	11
49814	16	JHP_07_Jpa	68	269	306	480	F				2016	8	2	2	C	2		3	611	12	11
49817	17	JHP_07_Jpa	69	262	311	450	F				2016	8	2	2	C	2		3	611	12	11
49821	07	JHP_07_Jpa	72	264	309.521	470	F				2016	8	2	2	C	2		3	611	12	11
49821	17	JHP_07_Jpa	73	292	341	600	F				2016	8	2	3	D	2		3	611	12	11
49821	18	JHP_07_Jpa	74	320	371		F				2016	8	2	3	C	2		3	611	12	11
49822	10	JHP_07_Jpa	75	287	327	620	F				2016	8	2	2	D	2		3	611	12	11
49826	05	JHP_07_Jpa	77	300	349	700	F				2016	9	2	2	D	2		3	611	12	11
49828	24	JHP_07_Jpa	78	284	326	570	F				2016	9	2	2	D	2		3	611	12	11
FL1532120080427002	TQ0803439	JHP_07_Jpa	82	315	362		F				2008	4	2	3	D	3		1	610	FL	11											18
345190	20161830998	JHP_07_JPA	85	314	364.271	720	D				2016	5	2	4	D	3		1	610	FL	11
345190	20161831000	JHP_07_JPA	87	322	373.031	800	D				2016	5	2	2	C	2		1	610	FL	11
345190	20161831001	JHP_07_JPA	88	310	359.891	720	D				2016	5	2	1	C	2		1	610	FL	11
345190	20161831002	JHP_07_JPA	89	315	365.366	750	D				2016	5	2	1	C	2		1	610	FL	11
345171	20161830869	JHP_08_JPA	1	263	308.426	510	D				2016	5	2	2	B	2		1	611	FL	12
345171	20161830871	JHP_08_JPA	3	263	308.426	510	D				2016	5	2	2	D	2		1	611	FL	12
345171	20161830872	JHP_08_JPA	4	250	294.191	410	D				2016	5	2	1	D	2		1	611	FL	12
345171	20161830873	JHP_08_JPA	5	314	364.271	830	D				2016	5	2	2	C	2		1	611	FL	12
345171	20161830874	JHP_08_JPA	6	332	383.981	950	D				2016	5	2	3	C	3		1	611	FL	12
345171	20161830875	JHP_08_JPA	7	265	310.616	520	D				2016	5	2	2	B	2		1	611	FL	12
47381	13	JHP_01_Jpa	8	324	353	830	F	3	3	4	2015	3	3	3	d	4		3	611	12	11	0	y	3	0
47413	07	JHP_01_Jpa	12	246	284	345	F	1	4	2	2015	3	3	4	b	2		3	611	12	12	-2	n	2	0.5
47414	06	JHP_01_Jpa	13	317	372	800	F	2	4	3	2015	3	3	2	c	3		3	611	12	12	-1	n	2.5	0.2
47414	16	JHP_01_Jpa	14	353	409		U	3	4	4	2015	3	3	4	d	4		3	611	12	12	0	y	3	0
47415	18	JHP_01_Jpa	17	248	285		F	2	4	3	2015	3	3	2	c	3		3	611	12	12	-1	n	2.5	0.2
47415	19	JHP_01_Jpa	18	344	396		M	3	4	4	2015	3	3	4	d	4		3	611	12	12	0	y	3	0
47422	09	JHP_01_Jpa	20	306	349		U	2	4	3	2015	4	3	3	c	3		3	611	12	12	-1	n	2.5	0.2
47422	11	JHP_01_Jpa	22	308	362		U	2	4	3	2015	4	3	3	b	3		3	611	12	12	-1	n	2.5	0.2
47422	13	JHP_01_Jpa	24	272	318		F	2	4	3	2015	4	3			3		3	611	12	12	-1	n	2.5	0.2
47423	09	JHP_01_Jpa	26	355	420	1110	M	4	3	5	2015	5	3	2	d	5		3	611	12	12	1	n	3.5	0.142857
47552	02	JHP_01_Jpa	29	365	425	1120	F	3	3	4	2015	1	3	3	d	4		3	611	12	11	0	y	3	0
47558	07	JHP_01_Jpa	31	400	465		F	3	3	4	2015	1	3	2	c	4		3	611	12	11	0	y	3	0
47562	14	JHP_01_Jpa	36	330	385	900	F	3	3	4	2015	1	3	2	d	4		3	611	12	12	0	y	3	0
47562	77	JHP_01_Jpa	39	332	387	920	F	2	4	3	2015	1	3	2	c	3		3	611	12	12	-1	n	2.5	0.2
47563	09	JHP_01_Jpa	41	292	340	620	F	3	3	4	2015	1	3	3	d	4		3	611	12	12	0	y	3	0
47563	18	JHP_01_Jpa	42	310	357	710	F	3	3	4	2015	1	3	3	d	4		3	611	12	12	0	y	3	0
47567	13	JHP_01_Jpa	45	340	395	1050	F	4	3	5	2015	1	3	3	d	5		3	611	12	12	1	n	3.5	0.142857
47567	15	JHP_01_Jpa	46	390	445	1450	M	3	4	4	2015	1	3	3	c	4		3	611	12	12	0	y	3	0
47583	01	JHP_01_Jpa	50	375	420	1260	F	3	4	4	2015	2	3	4	d	4		3	611	12	12	0	y	3	0
47583	04	JHP_01_Jpa	52	387	440	1430	M	3	4	4	2015	2	3	4	d	4		3	611	12	12	0	y	3	0
47583	05	JHP_01_Jpa	53	447	512	2310	M	3	3	4	2015	2	3	3	d	4		3	611	12	12	0	y	3	0
47583	07	JHP_01_Jpa	55	340	390	880	F	3	4	4	2015	2	3	3	d	4		3	611	12	12	0	y	3	0
47583	08	JHP_01_Jpa	56	410	470	1560	M	3	3	4	2015	2	3	4	C	4		3	611	12	12	0		3	0
47583	09	JHP_01_Jpa	57	317	370	840	F	3	3	4	2015	2	3	3	C	4		3	611	12	12	0		3	0
47583	10	JHP_01_Jpa	58	327	382	870	F	3	3	4	2015	2	3	3	D	4		3	611	12	12	0		3	0
47583	11	JHP_01_Jpa	59	405	465	1580	M	3	3	4	2015	2	3	2	D	4		3	611	12	12	0		3	0
47583	12	JHP_01_Jpa	60	387	452	1380	F	3	4	4	2015	2	3	4	D	4		3	611	12	12	0		3	0
47583	14	JHP_01_Jpa	62	372	425	1280	F	3	4	4	2015	2	3	4	D	4		3	611	12	12	0		3	0
47583	16	JHP_01_Jpa	64	377	435	1270	F	3	3	4	2015	2	3	3	D	4		3	611	12	12	0		3	0
47583	19	JHP_01_Jpa	66	360	417	1150	F	3	3	4	2015	2	3	3	C	4		3	611	12	12	0		3	0
47583	20	JHP_01_Jpa	67	380	445	1380	F	3	3	4	2015	2	3	3	D	4		3	611	12	12	0		3	0
47583	21	JHP_01_Jpa	68	395	455	1480	F	3	3	4	2015	2	3	3	D	4		3	611	12	12	0		3	0
47583	23	JHP_01_Jpa	70	425	485	1740	M	3	4	4	2015	2	3	3	D	4		3	611	12	12	0		3	0
47583	26	JHP_01_Jpa	71	350	410	1120	F	3	3	4	2015	2	3	3	D	4		3	611	12	12	0		3	0
47584	05	JHP_01_Jpa	72	305	365	730	F	3	3	4	2015	2	3	2	D	4		3	611	12	12	0		3	0
47584	06	JHP_01_Jpa	73	357	420	1150	F	3	3	4	2015	2	3	3	D	4		3	611	12	12	0		3	0
47584	07	JHP_01_Jpa	74	330	390	840	F	3	2	3	2015	2	3	2	D	3		3	611	12	12	0		3	0
47584	08	JHP_01_Jpa	75	365	430	1230	F	3	3	4	2015	2	3	3	D	4		3	611	12	12	0		3	0
47584	14	JHP_01_Jpa	76	345	410	970	F	3	3	4	2015	2	3	3	D	4		3	611	12	12	0		3	0
47589	35	JHP_01_Jpa	79	300	347	680	F	3	2	3	2015	2	3	2	D	3		3	611	12	12	0		3	0
47589	40	JHP_01_Jpa	80	357	412	1180	F	3	4	4	2015	2	3	4	E	4		3	611	12	12	0		3	0
47590	12	JHP_01_Jpa	87	317	365	820	F	3	3	4	2015	2	3	3	D	4		3	611	12	12	0		3	0
47599	02	JHP_02_Jpa	1	380	432	1340	F	3	4	4	2015	2	3	3	D	4		3	611	12	12	0		3	0
47599	03	JHP_02_Jpa	2	340	390	910	F	3	4	4	2015	2	3	3	D	4		3	611	12	12	0		3	0
47599	06	JHP_02_Jpa	3	310	362	720	F	3	4	4	2015	2	3	2	C	4		3	611	12	12	0		3	0
47599	16	JHP_02_Jpa	9	355	415	1220	F	3	4	4	2015	2	3	3	D	4		3	611	12	12	0		3	0
47599	18	JHP_02_Jpa	11	345	397	960	F	3	4	4	2015	2	3	3	D	4		3	611	12	12	0		3	0
47599	20	JHP_02_Jpa	13	327	382	870	F	3	3	4	2015	2	3	2	D	4		3	611	12	12	0		3	0
47599	21	JHP_02_Jpa	14	345	410		M	3	4	4	2015	2	3	4	D	4		3	611	12	12	0		3	0
47705	01	JHP_02_Jpa	16	355	410	1070	F	3	4	4	2015	3	3	4	C	4		3	611	12	11	0		3	0
47705	02	JHP_02_Jpa	17	365	420	1100	M	3	4	4	2015	3	3	4	D	4		3	611	12	11	0		3	0
47705	05	JHP_02_Jpa	19	347	402	1020	F	2	4	3	2015	3	3	3	C	3		3	611	12	11	-1		2.5	0.2
47706	19	JHP_02_Jpa	23	320	365	800	F	3	1	3	2015	3	3	2	D	3		3	611	12	12	0		3	0
47708	01	JHP_02_Jpa	24	320	375	770	F	2	4	3	2015	3	3	4	C	3		3	611	12	12	-1		2.5	0.2
47714	09	JHP_02_Jpa	30	407	465	1560	M	3	4	4	2015	3	3	2	D	4		3	611	12	12	0		3	0
47714	11	JHP_02_Jpa	31	345	397	900	F	3	4	4	2015	3	3	3	D	4		3	611	12	12	0		3	0
47714	12	JHP_02_Jpa	32	330	375	890	F	3	4	4	2015	3	3	3	D	4		3	611	12	12	0		3	0
47718	13	JHP_02_Jpa	36	345	392	1000	F	3	3	4	2015	3	3	4	D	4		3	611	12	12	0		3	0
47746	37	JHP_02_Jpa	68	330	377	640	F	2	4	3	2015	4	3	1	D	3		3	611	12	12	-1		2.5	0.2
47788	09	JHP_02_Jpa	74	400	450	1570	M	3	3	4	2015	5	3	3	D	4		3	611	12	12	0		3	0
47792	53	JHP_02_Jpa	84	357	405	1390	F	3	4	4	2015	5	3	4	D	4		3	611	12	12	0		3	0
20161830268		JHP_06_Jpa	37	269	314.996	520		1	4	2	2016	3			A			CM	612	12	12
47798	04	JHP_02_Jpa	88	370	420	1170	F	3	4	4	2015	5	3	2	D	4		3	611	12	12	0		3	0
47819	12	JHP_03_Jpa	1	318	370	760	M	3	1	3	2015	5	3	1	D	3		3	611	12	11	0		3	0
47874	30	JHP_03_Jpa	11	299	339		F	3	4	3	2015	8	3	2	E	3		3	611	12	11	0		3	0
47880	15	JHP_03_Jpa	14	355	422	1050	U	4	1	4	2015	8	3	3	D	4		3	611	12	11	1		3.5	0.142857
47886	06	JHP_03_Jpa	15	387	444	1260	F	3	4	3	2015	8	3	3	C	3		3	611	12	11	0		3	0
48028	01	JHP_03_Jpa	21	392	455		F	3	3	4	2015	6	3	2	D	4		3	611	12	11	0		3	0
48028	04	JHP_03_Jpa	22	312	365		F	2	4	3	2015	6	3	1	D	3		3	611	12	11	-1		2.5	0.2
48028	07	JHP_03_Jpa	23	360	415		F	3	3	4	2015	6	3	2	D	4		3	611	12	11	0		3	0
48037	38	JHP_03_Jpa	26	360	420	1040	F	3	4	4	2015	6	3	3	D	4		3	611	12	12	0		3	0
48076	07	JHP_03_Jpa	35	352	405	980	F	3	2	3	2015	8	3	2	D	3		3	611	12	11	0		3	0
48093	10	JHP_03_Jpa	47	272	320	520	F	3	1	3	2015	8	3	2	E	3		3	611	12	12	0		3	0
48421	02	JHP_03_Jpa	53	377	445	1240	F	3	3	3	2015	9	3	2	D	3		3	611	12	11	0		3	0
48424	02	JHP_03_Jpa	54	330	377	800	F	3	2	3	2015	9	3	2	D	3		3	611	12	12	0		3	0
48424	28	JHP_03_Jpa	57	460	520	2180	F	3	4	3	2015	9	3	2	C	3		3	611	12	12	0		3	0
48424	29	JHP_03_Jpa	58	430	497	2050	F	3	4	3	2015	9	3	3	C	3		3	611	12	12	0		3	0
48433	21	JHP_03_Jpa	65	337	395	940	F	3	3	3	2015	9	3	2	D	3		3	611	12	12	0		3	0
	20151830481	JHP_05_Jpa	21	410	469.391	1570		3	4	4	2015	4	3	2	C	3		CM SPEARS		FL	11	0		3	0
48954	07	JHP_05_Jpa	65	380	445		F	3	4	4	2016	5	3	2	C	4		3	611	12	11	0		3	0
20161830467		JHP_06_Jpa	55	331	382.886	910		2	4	3	2016	3	3	3	C	4		CM	612	12	11	-1		2.5	0.2
20161830499		JHP_06_Jpa	64	314	364.271	790		2	4	3	2016	3	3	1	D	3		CM	989	12	11	-1		2.5	0.2
20161830500		JHP_06_Jpa	65	316	366.461	820		2	4	3	2016	3	3	2	D	3		CM	989	12	11	-1		2.5	0.2
20161830508		JHP_06_Jpa	73	283	330.326	620		3	4	4	2016	3	3	4	D	4		CM	989	12	11	0		3	0
40775	35	JHP_06_Jpa	74	327	380	920	F				2008	10	3	3	C	3		3	610	12	11											TQ0803691
48968	25	JHP_06_Jpa	77	317	367	770	F				2016	6	3	2	C	3		3	611	12	11
48981	01	JHP_06_Jpa	80	312	366	710	F				2016	6	3	2	D	3		3	611	12	11
48983	11	JHP_06_Jpa	85	326	370		M				2016	7	3	3	C	3		3	611	12	11											TQ1600755
48986	06	JHP_06_Jpa	87	285	331	610	F				2016	7	3	2	C	3		3	611	12	11
48994	17	JHP_06_Jpa	88	325	385		F				2016	7	3	2	D	3		3	611	12	11											TQ1600831
48994	19	JHP_06_Jpa	90	316	366		F				2016	7	3	3	C	3		3	611	12	11											TQ1600833
49365	10	JHP_07_Jpa	5	330	385	830	F				2016	4	3	2	D	3		3	611	12	12
49368	20	JHP_07_Jpa	7	395	450	1380	F				2016	4	3	4	D	4		3	611	12	12
49385	30	JHP_07_Jpa	15	310	355	650	U				2016	4	3	1	C	3		3	611	12	12
49395	60	JHP_07_Jpa	25	407	470	1700	F				2016	5	3	4	C	4		3	611	12	12
49700	57	JHP_07_Jpa	26	290	335	580	F				2016	5	3	1	C	3		3	611	12	12
49712	16	JHP_07_Jpa	29	295	345	620	F				2016	5	3	2	C	3		3	611	12	12
49731	09	JHP_07_Jpa	39	320	375	750	F				2016	6	3	3	D	4		3	611	12	12
49735	05	JHP_07_Jpa	44	297	344	670	F				2016	6	3	2	D	3		3	611	12	12
49807	13	JHP_07_Jpa	62	298	348		F				2016	8	3	2	D	3		3	611	12	11
49817	31	JHP_07_Jpa	70	276	316		F				2016	8	3	2	C	3		3	611	12	11
49822	12	JHP_07_Jpa	76	336	385	940	F				2016	8	3	2	D	3		3	611	12	11
345171	20161830870	JHP_08_JPA	2	279	325.946	620	D				2016	5	3	2	C	3		1	611	FL	12
345171	20161830876	JHP_08_JPA	8	256	300.761	470	D				2016	5	3	2	C	3		1	611	FL	12
47378	17	JHP_01_Jpa	6	347	392	960	F	3	3	4	2015	3	4	1	d	4		3	611	12	11	-1	n	3.5	0.142857
47395	12	JHP_01_Jpa	10	356	399	1050	F	3	4	4	2015	4	4	1	d	4		3	611	12	11	-1	n	3.5	0.142857
47411	03	JHP_01_Jpa	11	362	423		F	3	4	4	2015	2	4	4	d	4		3	611	12	12	-1	n	3.5	0.142857
47551	03	JHP_01_Jpa	28	310	360	740	F	3	4	4	2015	1	4	4	c	4		3	611	12	11	-1	n	3.5	0.142857
47562	12	JHP_01_Jpa	35	350	407	1100	F	4	4	5	2015	1	4	4	d	5		3	611	12	12	0	n	4	0
47562	23	JHP_01_Jpa	38	387	445	1430	M	4	4	5	2015	1	4	3	c	5		3	611	12	12	0	y	4	0
47563	01	JHP_01_Jpa	40	320	380	820	F	4	3	5	2015	1	4	4	d	5		3	611	12	12	0	n	4	0
47564	26	JHP_01_Jpa	44	325	382	840	F	4	4	5	2015	1	4	3	d	5		3	611	12	12	0	y	4	0
47577	07	JHP_01_Jpa	48	362	422	970	F	4	3	5	2015	1	4	2	d	5		3	611	12	12	0	y	4	0
47579	28	JHP_01_Jpa	49	402	460	1440	M	4	4	5	2015	2	4	3	d	5		3	611	12	12	0	y	4	0
47583	03	JHP_01_Jpa	51	415	475	1650	M	3	3	4	2015	2	4	3	c	4		3	611	12	12	-1	n	3.5	0.142857
47583	13	JHP_01_Jpa	61	420	480	1660	F	4	4	5	2015	2	4	3	D	5		3	611	12	12	0		4	0
47584	15	JHP_01_Jpa	77	355	412	1060	F	3	3	4	2015	2	4	2	D	4		3	611	12	12	-1		3.5	0.142857
47584	70	JHP_01_Jpa	78	340	397	910	F	4	2	4	2015	2	4	2	C	4		3	611	12	12	0		4	0
47590	08	JHP_01_Jpa	83	395	457	1570	F	3	4	4	2015	2	4	2	C	4		3	611	12	12	-1		3.5	0.142857
47590	09	JHP_01_Jpa	84	342	400	1060	F	3	4	4	2015	2	4	2	C	4		3	611	12	12	-1		3.5	0.142857
47590	10	JHP_01_Jpa	85	417	475	1780	M	3	4	4	2015	2	4	2	D	4		3	611	12	12	-1		3.5	0.142857
47590	13	JHP_01_Jpa	88	387	455	1420	M	4	4	5	2015	2	4	3	E	5		3	611	12	12	0		4	0
47599	01	JHP_01_Jpa	90	450	520	2220	F	4	3	5	2015	2	4	2	C	5		3	611	12	12	0		4	0
47712	18	JHP_02_Jpa	29	315	365	770	F	3	4	4	2015	3	4	2	C	4		3	611	12	12	-1		3.5	0.142857
47724	01	JHP_02_Jpa	37	400	460	1460	M	4	2	4	2015	3	4	2	C	4		3	611	12	12	0		4	0
47724	02	JHP_02_Jpa	38	405	472	1430	M	4	2	4	2015	3	4	4	C	4		3	611	12	12	0		4	0
47744	13	JHP_02_Jpa	63	340	392	760	F	4	4	5	2015	4	4	3	D	5		3	611	12	12	0		4	0
47744	24	JHP_02_Jpa	64	300	350	590	M	4	1	4	2015	4	4	1	D	4		3	611	12	12	0		4	0
47751	22	JHP_02_Jpa	70	467	535	2240	F	4	2	4	2015	4	4	2	D	4		3	611	12	12	0		4	0
47792	08	JHP_02_Jpa	76	380	440	1350	F	4	3	5	2015	5	4	2	E	5		3	611	12	12	0		4	0
47792	10	JHP_02_Jpa	77	480	542	2410	F	4	3	5	2015	5	4	2	D	5		3	611	12	12	0		4	0
47792	14	JHP_02_Jpa	79	440	475	1880	F	4	4	5	2015	5	4	2	EE	5		3	611	12	12	0		4	0
47792	52	JHP_02_Jpa	83	397	462	1520	F	4	3	5	2015	5	4	2	D	5		3	611	12	12	0		4	0
47804	07	JHP_02_Jpa	89	385	455	1430	M	4	2	4	2015	4	4	2	D	4		3	611	12	11	0		4	0
47856	21	JHP_03_Jpa	5	427	472	1570	F	4	2	4	2015	7	4	2	D	4		3	611	12	11	0		4	0
48053	41	JHP_03_Jpa	32	330	382	870	F	4	4	5	2015	6	4	3	E	5		3	611	12	12	0		4	0
48053	42	JHP_03_Jpa	33	445	507	1870	F	4	4	5	2015	6	4	3	D	5		3	611	12	12	0		4	0
48077	05	JHP_03_Jpa	36	410	472	1630	F	4	4	4	2015	8	4	4	D	4		3	611	12	11	0		4	0
48091	43	JHP_03_Jpa	40	375	430	1310	F	4	4	4	2015	8	4	4	D	4		3	611	12	12	0		4	0
48091	55	JHP_03_Jpa	41	400	457	1500	F	4	4	4	2015	8	4	2	C	4		3	611	12	12	0		4	0
48091	69	JHP_03_Jpa	42	397	450	1540	F	4	2	4	2015	8	4	2	D	4		3	611	12	12	0		4	0
48424	27	JHP_03_Jpa	56	392	445	1330	M	4	4	4	2015	9	4	3	D	4		3	611	12	12	0		4	0
48434	06	JHP_03_Jpa	66	350	407	980	F	4	1	4	2015	9	4	2	C	4		3	611	12	12	0		4	0
092215DT001	1	JHP_05_Jpa	22	410	457	1650	F	4	2	4	2015	9	4	2	D	4		2	611	12	12	0		4	0
092215DT001	3	JHP_05_Jpa	24	402	453	1660	F	4	1	4	2015	9	4	2	D	4		2	611	12	12	0		4	0
49320	12	JHP_05_Jpa	80	387	447	1400	F	4	2	4	2016	3	4	1	C	4		3	611	12	11	0		4	0
43937	01	JHP_06_Jpa	76	384	431	1240	F				2011	12	4	4	D	4		3	611	12	11											MI1101682
48994	18	JHP_06_Jpa	89	316	375		F				2016	7	4	2	C	4		3	611	12	11											TQ1600832
49368	24	JHP_07_Jpa	9	375	435	1200	F				2016	4	4	4	D	5		3	611	12	12
49368	25	JHP_07_Jpa	10	425	475	1710	M				2016	4	4	2	D	4		3	611	12	12
49368	26	JHP_07_Jpa	11	430	490	1800	F				2016	4	4	2	D	4		3	611	12	12
49395	24	JHP_07_Jpa	20	370	435	1260	F				2016	5	4	4	D	5		3	611	12	12
49395	59	JHP_07_Jpa	24	335	390	920	F				2016	5	4	3	D	5		3	611	12	12
49708	01	JHP_07_Jpa	27	350	410	1010	F				2016	5	4	2	C	4		3	611	12	12
49720	05	JHP_07_Jpa	34	365	420	1130	F				2016	5	4	1	C	4		3	611	12	11
49806	20	JHP_07_Jpa	61	253	280	360	M				2016	8	4	3	D	4		3	611	12	11
49810	10	JHP_07_Jpa	65	324	375	810	F				2016	8	4	2	D	4		3	611	12	11
FL1532120080427002	TQ0803438	JHP_07_Jpa	81	375	435		M				2008	4	4	4	C	5		1	610	FL	11											17
345190	20161830999	JHP_07_JPA	86	408	467.201	1540	D				2016	5	4	2	D	4		1	610	FL	11
345235	20161831003	JHP_07_JPA	90	368	423.401	1260	D				2016	5	4	2	E	4		1	760	FL	12
47420	07	JHP_01_Jpa	19	410	480	1625	U	4	4	5	2015	4	5	1	d	5		3	611	12	12	-1	n	4.5	0.111111
47552	03	JHP_01_Jpa	30	530	600	3080	M	5	2	5	2015	1	5	2	d	5		3	611	12	11	0	y	5	0
47590	07	JHP_01_Jpa	82	392	450	1480	F	5	1	5	2015	2	5	2	D	5		3	611	12	12	0		5	0
47728	25	JHP_02_Jpa	45	305	360	660	F	4	4	5	2015	3	5	1	D	5		3	611	12	12	-1		4.5	0.111111
47751	24	JHP_02_Jpa	71	445	520	2130	U	5	1	5	2015	4	5	2	D	5		3	611	12	12	0		5	0
47751	34	JHP_02_Jpa	72	460	532	2390	M	5	2	5	2015	4	5	2	D	5		3	611	12	12	0		5	0
47792	50	JHP_02_Jpa	82	437	502	2020	M	4	4	5	2015	5	5	2	D	5		3	611	12	12	-1		4.5	0.111111
47890	17	JHP_03_Jpa	16	421	485	1660	F	5	4	5	2015	9	5	2	D	5		3	611	12	11	0		5	0
48037	37	JHP_03_Jpa	25	450	510	2130	M	5	3	6	2015	6	5	2	E	6		3	611	12	12	0		5	0
48091	42	JHP_03_Jpa	39	415	475	1670	M	4	4	4	2015	8	5	4	D	4		3	611	12	12	-1		4.5	0.111111
48424	05	JHP_03_Jpa	55	455	525	2270	M	5	3	5	2015	9	5	3	C	5		3	611	12	12	0		5	0
48424	39	JHP_03_Jpa	61	475	540	2530	F	6	4	6	2015	9	5	3	D	6		3	611	12	12	1		5.5	0.0909091
48430	03	JHP_03_Jpa	62	380	440	1310	M	4	4	4	2015	9	5	2	D	4		3	611	12	12	-1		4.5	0.111111
43929	05	JHP_06_Jpa	75	282	329.231	560	F				2011	12	5	3	C	5		3	611	12	11											MI1101585
49395	23	JHP_07_Jpa	19	480	552	2570	F				2016	5	5	4	D	6		3	611	12	12
49395	27	JHP_07_Jpa	23	420	480	1520	F				2016	5	5	2	C	5		3	611	12	12
FL1532120080427002	TQ0803436	JHP_07_Jpa	79	422	485		M				2008	4	5	4	D	6		1	610	FL	11											15
345190	20161830997	JHP_07_JPA	84	397	455.156	1450	D				2016	5	5	2	D	5		1	610	FL	11
47562	17	JHP_01_Jpa	37	410	470	1740	F	6	1	6	2015	1	6	2	d	6		3	611	12	12	0	y	6	0
47569	13	JHP_01_Jpa	47	555	625	3880	M	6	3	7	2015	1	6	3	c	7		3	611	12	12	0	y	6	0
47738	16	JHP_02_Jpa	52	470	535	2270	M	6	4	7	2015	4	6	4	E	7		3	611	12	12	0		6	0
48007	12	JHP_03_Jpa	19	525	590	2870	F	6	4	7	2015	5	6	2	D	7		3	611	12	12	0		6	0
48424	38	JHP_03_Jpa	60	500	565	3070	M	7	4	7	2015	9	6	2	D	7		3	611	12	12	1		6.5	0.0769231
48436	02	JHP_03_Jpa	67	365	420	1130	M	6	4	6	2015	9	6	3	D	6		3	611	12	12	0		6	0
092215DT001	4	JHP_05_Jpa	25	461	513	2110	F	6	1	6	2015	9	6	2	D	6		2	611	12	12	0		6	0
092215DT001	6	JHP_05_Jpa	27	521	586	3450	F	6	4	6	2015	9	6	3	D	6		2	611	12	12	0		6	0
49368	27	JHP_07_Jpa	12	530	610	3760	M				2016	4	6	2	E	6		3	611	12	12
49395	26	JHP_07_Jpa	22	445	510	2070	M				2016	5	6	4	D	7		3	611	12	12
49716	02	JHP_07_Jpa	31	390	467	1430	F				2016	5	6	1	D	6		3	611	12	12
49731	04	JHP_07_Jpa	36	415	485	1680	M				2016	6	6	2	D	6		3	611	12	12
49749	02	JHP_07_Jpa	47	420	480	1900	F				2016	6	6	2	C	6		3	611	12	12
FL1532120080427002	TQ0803437	JHP_07_Jpa	80	455	522		M				2008	4	6	3	E	7		1	610	FL	11											16
FL1532120080427006	TQ0803509	JHP_07_Jpa	83	420	490		M				2008	4	6	2	D	6		1	610	FL	11											42
47386	06	JHP_01_Jpa	9	401	456	1510	F	5	3	6	2015	3	7	2	d	6		3	611	12	11	-2	n	6	0.166667
47792	19	JHP_02_Jpa	80	500	565	3020	M	7	1	7	2015	5	7	2	E	7		3	611	12	12	0		7	0
48037	43	JHP_03_Jpa	27	550	625	3960	F	7	3	8	2015	6	7	3	D	8		3	611	12	12	0		7	0
48424	33	JHP_03_Jpa	59	570	640	4050	M	7	3	7	2015	9	7	2	D	7		3	611	12	12	0		7	0
48433	01	JHP_03_Jpa	63	407	470	1750	F	8	4	8	2015	9	7	3	D	8		3	611	12	12	1		7.5	0.0666667
092215DT001	2	JHP_05_Jpa	23	536	599	3670	F	6	4	6	2015	9	7	3	C	6		2	611	12	12	-1		6.5	0.0769231
48983	09	JHP_06_Jpa	83	413	467	1720	F				2016	7	7	2	C	7		3	611	12	11
49368	18	JHP_07_Jpa	6	495	560	1630	M				2016	4	7	2	E	7		3	611	12	12
49395	25	JHP_07_Jpa	21	430	497	2000	M				2016	5	7	4	E	8		3	611	12	12
49749	41	JHP_07_Jpa	49	375	440	1340	F				2016	6	7	2	D	7		3	611	12	12
48091	31	JHP_03_Jpa	38	565	632	4080	M	8	4	8	2015	8	8	2	E	8		3	611	12	12	0		8	0
48433	16	JHP_03_Jpa	64	420	480	1850	M	8	1	8	2015	9	8	2	C	8		3	611	12	12	0		8	0
092215DT001	5	JHP_05_Jpa	26	552	596	4150	F	8	3	8	2015	9	8	2	F	8		2	611	12	12	0		8	0
48983	10	JHP_06_Jpa	84	476	539		F				2016	7	8	3	D	8		3	611	12	11											TQ1600754
49395	31	JHP_07_Jpa	18	445	520	2060	M				2016	5	8	1	D	8		3	611	12	12
48022	15	JHP_03_Jpa	20	500	570	3030	M	9	1	9	2015	6	9	2	E	9		3	611	12	12	0		9	0
49749	35	JHP_07_Jpa	48	405	475	1580	M				2016	6	9	2	D	9		3	611	12	12
48050	39	JHP_03_Jpa	31	600	670	5010	M	11	3	12	2015	6	12	2	D	12		3	611	12	12	-1		11.5	0.0434783
47792	29	JHP_02_Jpa	81	602	680	5190	F	12	3	13	2015	5	13	3	E	13		3	611	12	12	-1		12.5	0.04
47562	06	JHP_01_Jpa	34	387	440	1430	F	5	3	6	2015	1				6		3	611	12	12	5		5	0

## Sheet: Z
cal_age	freq
1	18
2	235
3	159
4	120
5	46
6	26
7	18
8	8
9	2
10
11
12	2
13	1
																		slope	Z		slope_2-9	Z_2-9
																		-0.695773	0.695773		-0.649694
			Age	1	2	3	4	5	6	7	8	9	10	11	12	13
			Freq	18	235	159	120	46	26	18	8	2			2	1
			ln-trans	2.89037	5.45959	5.0689	4.78749	3.82864	3.2581	2.89037	2.07944	0.693147			0.693147	0

## Sheet: repro_stagexmonth
MONTH	Gender	Stage	Substage				Month	Stage 1	stage 2	stage 3	stage 4	stage 5	stage 6	stage 7
1	1	2.1	1				1		9	2	3			6
1	1	2.1	1				2		13	7	15			11
1	1	2.1	1			Females	3		3	1	6			7
1	1	3.1	1				4		2	1			4	8
2	1	2.1	1				5		2				2	7
2	1	2.2	2				6
2	1	2.2	2				7
2	1	2.2	2				8
2	1	2.2	2				9
2	1	4	1				10							14
3	1	2.1	1				11		1					15
3	1	2.2	2				12		5		1			11
3	1	2.2	2
3	1	2.2	2
3	1	2.2	2
3	1	4	1
4	1	2.1	1
4	1	2.2	2
4	1	2.2	2
4	1	2.2	2
5	1	2.1	1
12	1	2.1	1
1	2	2.1	1
1	2	2.1	1
1	2	2.1	1
1	2	2.1	1
1	2	2.1	1
1	2	2.1	1
1	2	2.1	1
1	2	2.2	2
1	2	2.2	2
1	2	3.2	2
1	2	3.2	2
1	2	4.1	1
1	2	4.1	1
1	2	4.3	3				Monthly Macroscopic Stages of Female Jolthead Porgy. Sample sizes above columns.
1	2	7	0
1	2	7	0
1	2	7	0
1	2	7	0
1	2	7	0				Month	Stage 1	Stage 2	Stage 3	Stage 4
1	2	7	0				1		3	1
2	2	2.1	1				2		5		1
2	2	2.1	1			Males	3		5		1
2	2	2.1	1				4		4
2	2	2.1	1				5		1
2	2	2.1	1				6
2	2	2.1	1				7
2	2	2.1	1				8
2	2	2.1	1				9
2	2	2.2	2				10
2	2	2.2	2				11
2	2	2.2	2				12		1
2	2	2.2	2
2	2	2.2	2
2	2	3.1	1
2	2	3.1	1
2	2	3.1	1
2	2	3.1	1
2	2	3.2	2
2	2	3.2	2
2	2	3.2	2
2	2	4	0
2	2	4	0
2	2	4.1	1
2	2	4.1	1
2	2	4.1	1
2	2	4.1	1
2	2	4.1	1
2	2	4.1	1
2	2	4.1	1
2	2	4.1	1
2	2	4.2	2
2	2	4.2	2
2	2	4.2	2
2	2	4.2	2
2	2	4.2	2
2	2	7	0
2	2	7	0
2	2	7	0
2	2	7	0
2	2	7	0
2	2	7	0
2	2	7	0
2	2	7	0
2	2	7	0
2	2	7	0
2	2	7	1
3	2	2.1	1
3	2	2.1	1
3	2	2.1	1
3	2	3.1	1
3	2	4.1	1
3	2	4.1	1
3	2	4.3	3
3	2	4.3	3
3	2	4.3	3
3	2	4.3	3
3	2	7	0
3	2	7	0
3	2	7	0
3	2	7	0
3	2	7	0
3	2	7	0
3	2	7	1
4	2	2.1	1
4	2	2.2	2
4	2	3.1	1
4	2	6	0
4	2	6	0
4	2	6	0
4	2	6	0
4	2	7	0
4	2	7	0
4	2	7	0
4	2	7	0
4	2	7	0
4	2	7	0
4	2	7	0
4	2	7	1
5	2	2.1	1
5	2	2.1	1
5	2	6	0
5	2	6	0
5	2	7	0
5	2	7	0
5	2	7	0
5	2	7	0
5	2	7	0
5	2	7	0
5	2	7	0
10	2	7	0
10	2	7	0
10	2	7	0
10	2	7	0
10	2	7	0
10	2	7	0
10	2	7	0
10	2	7	0
10	2	7	0
10	2	7	0
10	2	7	0
10	2	7	0
10	2	7	0
10	2	7	0
11	2	2.1	1
11	2	7	0
11	2	7	0
11	2	7	0
11	2	7	0
11	2	7	0
11	2	7	0
11	2	7	0
11	2	7	0
11	2	7	0
11	2	7	0
11	2	7	0
11	2	7	0
11	2	7	0
11	2	7	0
11	2	7	0
12	2	2.1	1
12	2	2.1	2
12	2	2.1	2
12	2	2.1	2
12	2	2.2	2
12	2	4.1	1
12	2	7	0
12	2	7	0
12	2	7	0
12	2	7	0
12	2	7	0
12	2	7	0
12	2	7	0
12	2	7	0
12	2	7	0
12	2	7	0
12	2	7	0
2	3		0
2	3
2	3
4	3

## Sheet: growth
INTERVIEW_ID	TAG_NUMBER	SLIDE_BOX_NO	SLIDE	TL_mm	SEX	Year	MONTH	MLB_ring	MLB_edge	MLB_qual	Cal_age	Frac_age	FISHING_MODE_ID	GEAR_CODE	LANDING_AREA_STATE_CODE	AREA_ID		Cal_age	TL_mm	minsize	wt		Cal_age	TL_mm	minsize	wt		Cal_age	TL_mm	minsize	wt
47355	05	JHP_01_Jpa	1	289	F	2015	2	1	3	b	2	1.91667	3	611	12	11		2	289	235	1		2	289	250	1		2	289	235	1
47357	21	JHP_01_Jpa	2	290	F	2015	2	2	4	b	2	1.91667	3	611	12	11		2	290	235	1		2	290	250	1		2	290	235	1
47363	07	JHP_01_Jpa	3	309	F	2015	2	1	4	c	2	1.91667	3	611	12	11		2	309	235	1		2	309	250	1		2	309	235	1
47363	09	JHP_01_Jpa	4	260	F	2015	2	1	4	c	2	1.91667	3	611	12	11		2	260	235	1		2	260	250	1		2	260	235	1
47373	11	JHP_01_Jpa	5	310	M	2015	3	2	4	d	3	3	3	611	12	11		3	310	235	1		3	310	250	1		3	310	235	1
47378	17	JHP_01_Jpa	6	392	F	2015	3	4	1	d	4	4	3	611	12	11		4	392	235	1		4	392	250	1		4	392	235	1
47379	06	JHP_01_Jpa	7	309	F	2015	3	2	2	d	2	2	3	611	12	11		2	309	235	1		2	309	250	1		2	309	235	1
47381	13	JHP_01_Jpa	8	353	F	2015	3	3	3	d	4	4	3	611	12	11		4	353	235	1		4	353	250	1		4	353	235	1
47386	06	JHP_01_Jpa	9	456	F	2015	3	7	2	d	6	6	3	611	12	11		6	456	235	1		6	456	250	1		6	456	235	1
47395	12	JHP_01_Jpa	10	399	F	2015	4	4	1	d	4	4.08333	3	611	12	11		4	399	235	1		4	399	250	1		4	399	235	1
47411	03	JHP_01_Jpa	11	423	F	2015	2	4	4	d	4	3.91667	3	611	12	12		4	423	235	1		4	423	250	1		4	423	235	1
47413	07	JHP_01_Jpa	12	284	F	2015	3	3	4	b	2	2	3	611	12	12		2	284	235	1		2	284	250	1		2	284	235	1
47414	06	JHP_01_Jpa	13	372	F	2015	3	3	2	c	3	3	3	611	12	12		3	372	235	1		3	372	250	1		3	372	235	1
47414	16	JHP_01_Jpa	14	409	U	2015	3	3	4	d	4	4	3	611	12	12		4	409	235	1		4	409	250	1		4	409	235	1
47414	17	JHP_01_Jpa	15	332	U	2015	3	1	3	c	2	2	3	611	12	12		2	332	235	1		2	332	250	1		2	332	235	1
47414	18	JHP_01_Jpa	16	306	U	2015	3	2	2	c	2	2	3	611	12	12		2	306	235	1		2	306	250	1		2	306	235	1
47415	18	JHP_01_Jpa	17	285	F	2015	3	3	2	c	3	3	3	611	12	12		3	285	235	1		3	285	250	1		3	285	235	1
47415	19	JHP_01_Jpa	18	396	M	2015	3	3	4	d	4	4	3	611	12	12		4	396	235	1		4	396	250	1		4	396	235	1
47420	07	JHP_01_Jpa	19	480	U	2015	4	5	1	d	5	5.08333	3	611	12	12		5	480	235	1		5	480	250	1		5	480	235	1
47422	09	JHP_01_Jpa	20	349	U	2015	4	3	3	c	3	3.08333	3	611	12	12		3	349	235	1		3	349	250	1		3	349	235	1
47422	10	JHP_01_Jpa	21	310	U	2015	4	1	4	b	2	2.08333	3	611	12	12		2	310	235	1		2	310	250	1		2	310	235	1
47422	11	JHP_01_Jpa	22	362	U	2015	4	3	3	b	3	3.08333	3	611	12	12		3	362	235	1		3	362	250	1		3	362	235	1
47422	12	JHP_01_Jpa	23	299	U	2015	4	1	4	c	2	2.08333	3	611	12	12		2	299	235	1		2	299	250	1		2	299	235	1
47422	13	JHP_01_Jpa	24	318	F	2015	4	3			3	3.08333	3	611	12	12		3	318	235	1		3	318	250	1		3	318	235	1
47422	14	JHP_01_Jpa	25	363	U	2015	4	2	4	d	3	3.08333	3	611	12	12		3	363	235	1		3	363	250	1		3	363	235	1
47423	09	JHP_01_Jpa	26	420	M	2015	5	3	2	d	5	5.16667	3	611	12	12		5	420	235	1		5	420	250	1		5	420	235	1
47429	06	JHP_01_Jpa	27	295	F	2015	6	1	3	b	2	2.25	3	611	12	12		2	295	235	1		2	295	250	1		2	295	235	1
47551	03	JHP_01_Jpa	28	360	F	2015	1	4	4	c	4	3.83333	3	611	12	11		4	360	235	1		4	360	250	1		4	360	235	1
47552	02	JHP_01_Jpa	29	425	F	2015	1	3	3	d	4	3.83333	3	611	12	11		4	425	235	1		4	425	250	1		4	425	235	1
47552	03	JHP_01_Jpa	30	600	M	2015	1	5	2	d	5	4.83333	3	611	12	11		5	600	235	1		5	600	250	1		5	600	235	1
47558	07	JHP_01_Jpa	31	465	F	2015	1	3	2	c	4	3.83333	3	611	12	11		4	465	235	1		4	465	250	1		4	465	235	1
47560	01	JHP_01_Jpa	32	302	F	2015	1	1	4	c	2	1.83333	3	611	12	12		2	302	235	1		2	302	250	1		2	302	235	1
47560	91	JHP_01_Jpa	33	295	F	2015	1	1	4	c	2	1.83333	3	611	12	12		2	295	235	1		2	295	250	1		2	295	235	1
47562	06	JHP_01_Jpa	34	440	F	2015	1				6	5.83333	3	611	12	12		6	440	235	1		6	440	250	1		6	440	235	1
47562	12	JHP_01_Jpa	35	407	F	2015	1	4	4	d	5	4.83333	3	611	12	12		5	407	235	1		5	407	250	1		5	407	235	1
47562	14	JHP_01_Jpa	36	385	F	2015	1	3	2	d	4	3.83333	3	611	12	12		4	385	235	1		4	385	250	1		4	385	235	1
47562	17	JHP_01_Jpa	37	470	F	2015	1	6	2	d	6	5.83333	3	611	12	12		6	470	235	1		6	470	250	1		6	470	235	1
47562	23	JHP_01_Jpa	38	445	M	2015	1	4	3	c	5	4.83333	3	611	12	12		5	445	235	1		5	445	250	1		5	445	235	1
47562	77	JHP_01_Jpa	39	387	F	2015	1	3	2	c	3	2.83333	3	611	12	12		3	387	235	1		3	387	250	1		3	387	235	1
47563	01	JHP_01_Jpa	40	380	F	2015	1	4	4	d	5	4.83333	3	611	12	12		5	380	235	1		5	380	250	1		5	380	235	1
47563	09	JHP_01_Jpa	41	340	F	2015	1	3	3	d	4	3.83333	3	611	12	12		4	340	235	1		4	340	250	1		4	340	235	1
47563	18	JHP_01_Jpa	42	357	F	2015	1	3	3	d	4	3.83333	3	611	12	12		4	357	235	1		4	357	250	1		4	357	235	1
47563	48	JHP_01_Jpa	43	300	F	2015	1	2	4	c	3	2.83333	3	611	12	12		3	300	235	1		3	300	250	1		3	300	235	1
47564	26	JHP_01_Jpa	44	382	F	2015	1	4	3	d	5	4.83333	3	611	12	12		5	382	235	1		5	382	250	1		5	382	235	1
47567	13	JHP_01_Jpa	45	395	F	2015	1	3	3	d	5	4.83333	3	611	12	12		5	395	235	1		5	395	250	1		5	395	235	1
47567	15	JHP_01_Jpa	46	445	M	2015	1	3	3	c	4	3.83333	3	611	12	12		4	445	235	1		4	445	250	1		4	445	235	1
47569	13	JHP_01_Jpa	47	625	M	2015	1	6	3	c	7	6.83333	3	611	12	12		7	625	235	1		7	625	250	1		7	625	235	1
47577	07	JHP_01_Jpa	48	422	F	2015	1	4	2	d	5	4.83333	3	611	12	12		5	422	235	1		5	422	250	1		5	422	235	1
47579	28	JHP_01_Jpa	49	460	M	2015	2	4	3	d	5	4.91667	3	611	12	12		5	460	235	1		5	460	250	1		5	460	235	1
47583	01	JHP_01_Jpa	50	420	F	2015	2	3	4	d	4	3.91667	3	611	12	12		4	420	235	1		4	420	250	1		4	420	235	1
47583	03	JHP_01_Jpa	51	475	M	2015	2	4	3	c	4	3.91667	3	611	12	12		4	475	235	1		4	475	250	1		4	475	235	1
47583	04	JHP_01_Jpa	52	440	M	2015	2	3	4	d	4	3.91667	3	611	12	12		4	440	235	1		4	440	250	1		4	440	235	1
47583	05	JHP_01_Jpa	53	512	M	2015	2	3	3	d	4	3.91667	3	611	12	12		4	512	235	1		4	512	250	1		4	512	235	1
47583	06	JHP_01_Jpa	54	445	M	2015	2	2	4	c	4	3.91667	3	611	12	12		4	445	235	1		4	445	250	1		4	445	235	1
47583	07	JHP_01_Jpa	55	390	F	2015	2	3	3	d	4	3.91667	3	611	12	12		4	390	235	1		4	390	250	1		4	390	235	1
47583	08	JHP_01_Jpa	56	470	M	2015	2	3	4	C	4	3.91667	3	611	12	12		4	470	235	1		4	470	250	1		4	470	235	1
47583	09	JHP_01_Jpa	57	370	F	2015	2	3	3	C	4	3.91667	3	611	12	12		4	370	235	1		4	370	250	1		4	370	235	1
47583	10	JHP_01_Jpa	58	382	F	2015	2	3	3	D	4	3.91667	3	611	12	12		4	382	235	1		4	382	250	1		4	382	235	1
47583	11	JHP_01_Jpa	59	465	M	2015	2	3	2	D	4	3.91667	3	611	12	12		4	465	235	1		4	465	250	1		4	465	235	1
47583	12	JHP_01_Jpa	60	452	F	2015	2	3	4	D	4	3.91667	3	611	12	12		4	452	235	1		4	452	250	1		4	452	235	1
47583	13	JHP_01_Jpa	61	480	F	2015	2	4	3	D	5	4.91667	3	611	12	12		5	480	235	1		5	480	250	1		5	480	235	1
47583	14	JHP_01_Jpa	62	425	F	2015	2	3	4	D	4	3.91667	3	611	12	12		4	425	235	1		4	425	250	1		4	425	235	1
47583	15	JHP_01_Jpa	63	420	F	2015	2	2	3	D	3	2.91667	3	611	12	12		3	420	235	1		3	420	250	1		3	420	235	1
47583	16	JHP_01_Jpa	64	435	F	2015	2	3	3	D	4	3.91667	3	611	12	12		4	435	235	1		4	435	250	1		4	435	235	1
47583	18	JHP_01_Jpa	65	415	F	2015	2	2	4	E	3	2.91667	3	611	12	12		3	415	235	1		3	415	250	1		3	415	235	1
47583	19	JHP_01_Jpa	66	417	F	2015	2	3	3	C	4	3.91667	3	611	12	12		4	417	235	1		4	417	250	1		4	417	235	1
47583	20	JHP_01_Jpa	67	445	F	2015	2	3	3	D	4	3.91667	3	611	12	12		4	445	235	1		4	445	250	1		4	445	235	1
47583	21	JHP_01_Jpa	68	455	F	2015	2	3	3	D	4	3.91667	3	611	12	12		4	455	235	1		4	455	250	1		4	455	235	1
47583	22	JHP_01_Jpa	69	365	F	2015	2	2	3	C	3	2.91667	3	611	12	12		3	365	235	1		3	365	250	1		3	365	235	1
47583	23	JHP_01_Jpa	70	485	M	2015	2	3	3	D	4	3.91667	3	611	12	12		4	485	235	1		4	485	250	1		4	485	235	1
47583	26	JHP_01_Jpa	71	410	F	2015	2	3	3	D	4	3.91667	3	611	12	12		4	410	235	1		4	410	250	1		4	410	235	1
47584	05	JHP_01_Jpa	72	365	F	2015	2	3	2	D	4	3.91667	3	611	12	12		4	365	235	1		4	365	250	1		4	365	235	1
47584	06	JHP_01_Jpa	73	420	F	2015	2	3	3	D	4	3.91667	3	611	12	12		4	420	235	1		4	420	250	1		4	420	235	1
47584	07	JHP_01_Jpa	74	390	F	2015	2	3	2	D	3	2.91667	3	611	12	12		3	390	235	1		3	390	250	1		3	390	235	1
47584	08	JHP_01_Jpa	75	430	F	2015	2	3	3	D	4	3.91667	3	611	12	12		4	430	235	1		4	430	250	1		4	430	235	1
47584	14	JHP_01_Jpa	76	410	F	2015	2	3	3	D	4	3.91667	3	611	12	12		4	410	235	1		4	410	250	1		4	410	235	1
47584	15	JHP_01_Jpa	77	412	F	2015	2	4	2	D	4	3.91667	3	611	12	12		4	412	235	1		4	412	250	1		4	412	235	1
47584	70	JHP_01_Jpa	78	397	F	2015	2	4	2	C	4	3.91667	3	611	12	12		4	397	235	1		4	397	250	1		4	397	235	1
47589	35	JHP_01_Jpa	79	347	F	2015	2	3	2	D	3	2.91667	3	611	12	12		3	347	235	1		3	347	250	1		3	347	235	1
47589	40	JHP_01_Jpa	80	412	F	2015	2	3	4	E	4	3.91667	3	611	12	12		4	412	235	1		4	412	250	1		4	412	235	1
47589	41	JHP_01_Jpa	81	402	F	2015	2	2	4	D	3	2.91667	3	611	12	12		3	402	235	1		3	402	250	1		3	402	235	1
47590	07	JHP_01_Jpa	82	450	F	2015	2	5	2	D	5	4.91667	3	611	12	12		5	450	235	1		5	450	250	1		5	450	235	1
47590	08	JHP_01_Jpa	83	457	F	2015	2	4	2	C	4	3.91667	3	611	12	12		4	457	235	1		4	457	250	1		4	457	235	1
47590	09	JHP_01_Jpa	84	400	F	2015	2	4	2	C	4	3.91667	3	611	12	12		4	400	235	1		4	400	250	1		4	400	235	1
47590	10	JHP_01_Jpa	85	475	M	2015	2	4	2	D	4	3.91667	3	611	12	12		4	475	235	1		4	475	250	1		4	475	235	1
47590	11	JHP_01_Jpa	86	375	F	2015	2	2	4	D	3	2.91667	3	611	12	12		3	375	235	1		3	375	250	1		3	375	235	1
47590	12	JHP_01_Jpa	87	365	F	2015	2	3	3	D	4	3.91667	3	611	12	12		4	365	235	1		4	365	250	1		4	365	235	1
47590	13	JHP_01_Jpa	88	455	M	2015	2	4	3	E	5	4.91667	3	611	12	12		5	455	235	1		5	455	250	1		5	455	235	1
47591	28	JHP_01_Jpa	89	385	F	2015	2	2	4	C	3	2.91667	3	611	12	12		3	385	235	1		3	385	250	1		3	385	235	1
47599	01	JHP_01_Jpa	90	520	F	2015	2	4	2	C	5	4.91667	3	611	12	12		5	520	235	1		5	520	250	1		5	520	235	1
47599	02	JHP_02_Jpa	1	432	F	2015	2	3	3	D	4	3.91667	3	611	12	12		4	432	235	1		4	432	250	1		4	432	235	1
47599	03	JHP_02_Jpa	2	390	F	2015	2	3	3	D	4	3.91667	3	611	12	12		4	390	235	1		4	390	250	1		4	390	235	1
47599	06	JHP_02_Jpa	3	362	F	2015	2	3	2	C	4	3.91667	3	611	12	12		4	362	235	1		4	362	250	1		4	362	235	1
47599	07	JHP_02_Jpa	4	380	F	2015	2	2	4	C	3	2.91667	3	611	12	12		3	380	235	1		3	380	250	1		3	380	235	1
47599	10	JHP_02_Jpa	5	390	F	2015	2	2	3	C	3	2.91667	3	611	12	12		3	390	235	1		3	390	250	1		3	390	235	1
47599	11	JHP_02_Jpa	6	395	M	2015	2	2	4	C	3	2.91667	3	611	12	12		3	395	235	1		3	395	250	1		3	395	235	1
47599	12	JHP_02_Jpa	7	370	M	2015	2	2	3	D	3	2.91667	3	611	12	12		3	370	235	1		3	370	250	1		3	370	235	1
47599	15	JHP_02_Jpa	8	325	F	2015	2	1	4	C	2	1.91667	3	611	12	12		2	325	235	1		2	325	250	1		2	325	235	1
47599	16	JHP_02_Jpa	9	415	F	2015	2	3	3	D	4	3.91667	3	611	12	12		4	415	235	1		4	415	250	1		4	415	235	1
47599	17	JHP_02_Jpa	10	385	F	2015	2	2	3	D	3	2.91667	3	611	12	12		3	385	235	1		3	385	250	1		3	385	235	1
47599	18	JHP_02_Jpa	11	397	F	2015	2	3	3	D	4	3.91667	3	611	12	12		4	397	235	1		4	397	250	1		4	397	235	1
47599	19	JHP_02_Jpa	12	385	F	2015	2	2	4	D	3	2.91667	3	611	12	12		3	385	235	1		3	385	250	1		3	385	235	1
47599	20	JHP_02_Jpa	13	382	F	2015	2	3	2	D	4	3.91667	3	611	12	12		4	382	235	1		4	382	250	1		4	382	235	1
47599	21	JHP_02_Jpa	14	410	M	2015	2	3	4	D	4	3.91667	3	611	12	12		4	410	235	1		4	410	250	1		4	410	235	1
47599	22	JHP_02_Jpa	15	420	F	2015	2	2	4	C	3	2.91667	3	611	12	12		3	420	235	1		3	420	250	1		3	420	235	1
47705	01	JHP_02_Jpa	16	410	F	2015	3	3	4	C	4	4	3	611	12	11		4	410	235	1		4	410	250	1		4	410	235	1
47705	02	JHP_02_Jpa	17	420	M	2015	3	3	4	D	4	4	3	611	12	11		4	420	235	1		4	420	250	1		4	420	235	1
47705	03	JHP_02_Jpa	18	310	F	2015	3	2	4	C	2	2	3	611	12	11		2	310	235	1		2	310	250	1		2	310	235	1
47705	05	JHP_02_Jpa	19	402	F	2015	3	3	3	C	3	3	3	611	12	11		3	402	235	1		3	402	250	1		3	402	235	1
47706	10	JHP_02_Jpa	20	290	F	2015	3	1	4	C	2	2	3	611	12	12		2	290	235	1		2	290	250	1		2	290	235	1
47706	11	JHP_02_Jpa	21	375	F	2015	3	2	4	D	3	3	3	611	12	12		3	375	235	1		3	375	250	1		3	375	235	1
47706	18	JHP_02_Jpa	22	325	F	2015	3	2	1	D	2	2	3	611	12	12		2	325	235	1		2	325	250	1		2	325	235	1
47706	19	JHP_02_Jpa	23	365	F	2015	3	3	2	D	3	3	3	611	12	12		3	365	235	1		3	365	250	1		3	365	235	1
47708	01	JHP_02_Jpa	24	375	F	2015	3	3	4	C	3	3	3	611	12	12		3	375	235	1		3	375	250	1		3	375	235	1
47708	02	JHP_02_Jpa	25	335	F	2015	3	1	4	B	2	2	3	611	12	12		2	335	235	1		2	335	250	1		2	335	235	1
47708	22	JHP_02_Jpa	26	320	F	2015	3	1	4	C	2	2	3	611	12	12		2	320	235	1		2	320	250	1		2	320	235	1
47708	99	JHP_02_Jpa	27	310	F	2015	3	2	1	C	2	2	3	611	12	12		2	310	235	1		2	310	250	1		2	310	235	1
47711	18	JHP_02_Jpa	28	235	F	2015	3	2	2	C	2	2	3	611	12	12		2	235	235	1		4	365	250	1		2	235	235	1
47712	18	JHP_02_Jpa	29	365	F	2015	3	4	2	C	4	4	3	611	12	12		4	365	235	1		4	465	250	1		4	365	235	1
47714	09	JHP_02_Jpa	30	465	M	2015	3	3	2	D	4	4	3	611	12	12		4	465	235	1		4	397	250	1		4	465	235	1
47714	11	JHP_02_Jpa	31	397	F	2015	3	3	3	D	4	4	3	611	12	12		4	397	235	1		4	375	250	1		4	397	235	1
47714	12	JHP_02_Jpa	32	375	F	2015	3	3	3	D	4	4	3	611	12	12		4	375	235	1		3	375	250	1		4	375	235	1
47714	13	JHP_02_Jpa	33	375	F	2015	3	2	4	D	3	3	3	611	12	12		3	375	235	1		3	370	250	1		3	375	235	1
47716	38	JHP_02_Jpa	34	370	F	2015	3	2	4	E	3	3	3	611	12	12		3	370	235	1		3	420	250	1		3	370	235	1
47718	12	JHP_02_Jpa	35	420	F	2015	3	2	4	D	3	3	3	611	12	12		3	420	235	1		4	392	250	1		3	420	235	1
47718	13	JHP_02_Jpa	36	392	F	2015	3	3	4	D	4	4	3	611	12	12		4	392	235	1		4	460	250	1		4	392	235	1
47724	01	JHP_02_Jpa	37	460	M	2015	3	4	2	C	4	4	3	611	12	12		4	460	235	1		4	472	250	1		4	460	235	1
47724	02	JHP_02_Jpa	38	472	M	2015	3	4	4	C	4	4	3	611	12	12		4	472	235	1		3	355	250	1		4	472	235	1
47727	01	JHP_02_Jpa	39	355	M	2015	3	2	3	D	3	3	3	611	12	12		3	355	235	1		2	305	250	1		3	355	235	1
47727	18	JHP_02_Jpa	40	305	F	2015	3	2	1	C	2	2	3	611	12	12		2	305	235	1		2	315	250	1		2	305	235	1
47728	17	JHP_02_Jpa	41	315	F	2015	3	1	4	C	2	2	3	611	12	12		2	315	235	1		3	377	250	1		2	315	235	1
47728	18	JHP_02_Jpa	42	377	F	2015	3	2	2	C	3	3	3	611	12	12		3	377	235	1		3	340	250	1		3	377	235	1
47728	21	JHP_02_Jpa	43	340	F	2015	3	2	3	D	3	3	3	611	12	12		3	340	235	1		3	335	250	1		3	340	235	1
47728	24	JHP_02_Jpa	44	335	F	2015	3	2	2	E	3	3	3	611	12	12		3	335	235	1		5	360	250	1		3	335	235	1
47728	25	JHP_02_Jpa	45	360	F	2015	3	5	1	D	5	5	3	611	12	12		5	360	235	1		3	397	250	1		5	360	235	1
47730	09	JHP_02_Jpa	46	397	F	2015	3	2	4	C	3	3	3	611	12	12		3	397	235	1		2	330	250	1		3	397	235	1
47732	31	JHP_02_Jpa	48	330	F	2015	2	2	4	C	2	1.91667	3	611	12	12		2	330	235	1		2	347	250	1		2	330	235	1
47733	06	JHP_02_Jpa	49	347	F	2015	3	1	4	C	2	2	3	611	12	12		2	347	235	1		2	320	250	1		2	347	235	1
47736	03	JHP_02_Jpa	50	320	F	2015	4	1	4	B	2	2.08333	3	611	12	12		2	320	235	1		3	382	250	1		2	320	235	1
47736	04	JHP_02_Jpa	51	382	F	2015	4	2	3	D	3	3.08333	3	611	12	12		3	382	235	1		7	535	250	1		3	382	235	1
47738	16	JHP_02_Jpa	52	535	M	2015	4	6	4	E	7	7.08333	3	611	12	12		7	535	235	1		2	305	250	1		7	535	235	1
47740	15	JHP_02_Jpa	53	305	F	2015	4	2	1	D	2	2.08333	3	611	12	12		2	305	235	1		2	302	250	1		2	305	235	1
47740	16	JHP_02_Jpa	54	302	F	2015	4	2	1	D	2	2.08333	3	611	12	12		2	302	235	1		2	337	250	1		2	302	235	1
47740	17	JHP_02_Jpa	55	337	F	2015	4	2	1	B	2	2.08333	3	611	12	12		2	337	235	1		2	320	250	1		2	337	235	1
47740	19	JHP_02_Jpa	56	320	F	2015	4	2	1	C	2	2.08333	3	611	12	12		2	320	235	1		2	290	250	1		2	320	235	1
47741	01	JHP_02_Jpa	57	290	F	2015	4	2	1	B	2	2.08333	3	611	12	12		2	290	235	1		2	315	250	1		2	290	235	1
47741	02	JHP_02_Jpa	58	315	F	2015	4	1	4	C	2	2.08333	3	611	12	12		2	315	235	1		2	325	250	1		2	315	235	1
47741	09	JHP_02_Jpa	59	325	F	2015	4	1	3	C	2	2.08333	3	611	12	12		2	325	235	1		2	305	250	1		2	325	235	1
47741	38	JHP_02_Jpa	60	305	F	2015	4	2	1	C	2	2.08333	3	611	12	12		2	305	235	1		2	310	250	1		2	305	235	1
47743	04	JHP_02_Jpa	61	310	F	2015	4	2	1	C	2	2.08333	3	611	12	12		2	310	235	1		2	302	250	1		2	310	235	1
47743	10	JHP_02_Jpa	62	302	F	2015	4	1	4	B	2	2.08333	3	611	12	12		2	302	235	1		5	392	250	1		2	302	235	1
47744	13	JHP_02_Jpa	63	392	F	2015	4	4	3	D	5	5.08333	3	611	12	12		5	392	235	1		4	350	250	1		5	392	235	1
47744	24	JHP_02_Jpa	64	350	M	2015	4	4	1	D	4	4.08333	3	611	12	12		4	350	235	1		2	305	250	1		4	350	235	1
47746	04	JHP_02_Jpa	65	305	F	2015	4	2	1	D	2	2.08333	3	611	12	12		2	305	235	1		2	282	250	1		2	305	235	1
47746	12	JHP_02_Jpa	66	282	F	2015	4	1	4	C	2	2.08333	3	611	12	12		2	282	235	1		2	305	250	1		2	282	235	1
47746	13	JHP_02_Jpa	67	305	F	2015	4	2	1	D	2	2.08333	3	611	12	12		2	305	235	1		3	377	250	1		2	305	235	1
47746	37	JHP_02_Jpa	68	377	F	2015	4	3	1	D	3	3.08333	3	611	12	12		3	377	235	1		2	320	250	1		3	377	235	1
47746	40	JHP_02_Jpa	69	320	F	2015	4	1	4	C	2	2.08333	3	611	12	12		2	320	235	1		4	535	250	1		2	320	235	1
47751	22	JHP_02_Jpa	70	535	F	2015	4	4	2	D	4	4.08333	3	611	12	12		4	535	235	1		5	520	250	1		4	535	235	1
47751	24	JHP_02_Jpa	71	520	U	2015	4	5	2	D	5	5.08333	3	611	12	12		5	520	235	1		5	532	250	1		5	520	235	1
47751	34	JHP_02_Jpa	72	532	M	2015	4	5	2	D	5	5.08333	3	611	12	12		5	532	235	1		2	352	250	1		5	532	235	1
47783	20	JHP_02_Jpa	73	352	F	2015	5	1	4	B	2	2.16667	3	611	12	12		2	352	235	1		4	450	250	1		2	352	235	1
47788	09	JHP_02_Jpa	74	450	M	2015	5	3	3	D	4	4.16667	3	611	12	12		4	450	235	1		2	337	250	1		4	450	235	1
47789	09	JHP_02_Jpa	75	337	F	2015	5	1	4	C	2	2.16667	3	611	12	12		2	337	235	1		5	440	250	1		2	337	235	1
47792	08	JHP_02_Jpa	76	440	F	2015	5	4	2	E	5	5.16667	3	611	12	12		5	440	235	1		5	542	250	1		5	440	235	1
47792	10	JHP_02_Jpa	77	542	F	2015	5	4	2	D	5	5.16667	3	611	12	12		5	542	235	1		3	400	250	1		5	542	235	1
47792	11	JHP_02_Jpa	78	400	F	2015	5	2	3	C	3	3.16667	3	611	12	12		3	400	235	1		5	475	250	1		3	400	235	1
47792	14	JHP_02_Jpa	79	475	F	2015	5	4	2	EE	5	5.16667	3	611	12	12		5	475	235	1		7	565	250	1		5	475	235	1
47792	19	JHP_02_Jpa	80	565	M	2015	5	7	2	E	7	7.16667	3	611	12	12		7	565	235	1		13	680	250	1		7	565	235	1
47792	29	JHP_02_Jpa	81	680	F	2015	5	13	3	E	13	13.1667	3	611	12	12		13	680	235	1		5	502	250	1		13	680	235	1
47792	50	JHP_02_Jpa	82	502	M	2015	5	5	2	D	5	5.16667	3	611	12	12		5	502	235	1		5	462	250	1		5	502	235	1
47792	52	JHP_02_Jpa	83	462	F	2015	5	4	2	D	5	5.16667	3	611	12	12		5	462	235	1		4	405	250	1		5	462	235	1
47792	53	JHP_02_Jpa	84	405	F	2015	5	3	4	D	4	4.16667	3	611	12	12		4	405	235	1		2	317	250	1		4	405	235	1
47795	05	JHP_02_Jpa	85	317	F	2015	5	2	1	D	2	2.16667	3	611	12	12		2	317	235	1		2	317	250	1		2	317	235	1
47795	06	JHP_02_Jpa	86	317	F	2015	5	2	2	D	2	2.16667	3	611	12	12		2	317	235	1		3	312	250	1		2	317	235	1
47795	36	JHP_02_Jpa	87	312	F	2015	5	2	4	D	3	3.16667	3	611	12	12		3	312	235	1		4	420	250	1		3	312	235	1
47798	04	JHP_02_Jpa	88	420	F	2015	5	3	2	D	4	4.16667	3	611	12	12		4	420	235	1		4	455	250	1		4	420	235	1
47804	07	JHP_02_Jpa	89	455	M	2015	4	4	2	D	4	4.08333	3	611	12	11		4	455	235	1		2	331	250	1		4	455	235	1
47808	05	JHP_02_Jpa	90	331	F	2015	4	1	4	C	2	2.08333	3	611	12	11		2	331	235	1		3	370	250	1		2	331	235	1
47819	12	JHP_03_Jpa	1	370	M	2015	5	3	1	D	3	3.16667	3	611	12	11		3	370	235	1		2	325	250	1		3	370	235	1
47845	14	JHP_03_Jpa	2	325	F	2015	6	2	2	C	2	2.25	3	611	12	11		2	325	235	1		2	323	250	1		2	325	235	1
47848	18	JHP_03_Jpa	3	323	F	2015	6	2	2	C	2	2.25	3	611	12	11		2	323	235	1		2	324	250	1		2	323	235	1
47856	20	JHP_03_Jpa	4	324	F	2015	7	2	2	D	2	2.33333	3	611	12	11		2	324	235	1		4	472	250	1		2	324	235	1
47856	21	JHP_03_Jpa	5	472	F	2015	7	4	2	D	4	4.33333	3	611	12	11		4	472	235	1		2	316	250	1		4	472	235	1
47862	06	JHP_03_Jpa	6	316	F	2015	7	2	2	D	2	2.33333	3	611	12	11		2	316	235	1		2	342	250	1		2	316	235	1
47863	13	JHP_03_Jpa	7	342	F	2015	7	2	2	D	2	2.33333	3	611	12	11		2	342	235	1		2	327	250	1		2	342	235	1
47864	11	JHP_03_Jpa	8	327	F	2015	7	2	2	D	2	2.33333	3	611	12	11		2	327	235	1		2	405	250	1		2	327	235	1
47868	12	JHP_03_Jpa	9	405	F	2015	7	2	3	D	2	2.33333	3	611	12	11		2	405	235	1		2	356	250	1		2	405	235	1
47872	05	JHP_03_Jpa	10	356	F	2015	8	2	2	C	2	2.41667	3	611	12	11		2	356	235	1		3	339	250	1		2	356	235	1
47874	30	JHP_03_Jpa	11	339	F	2015	8	3	2	E	3	3.41667	3	611	12	11		3	339	235	1		2	333.611	250	1		3	339	235	1
47876	18	JHP_03_Jpa	12	333.611	F	2015	8	2	2	D	2	2.41667	3	611	12	11		2	333.611	235	1		2	332	250	1		2	333.611	235	1
47877	17	JHP_03_Jpa	13	332	F	2015	8	2	2	D	2	2.41667	3	611	12	11		2	332	235	1		4	422	250	1		2	332	235	1
47880	15	JHP_03_Jpa	14	422	U	2015	8	3	3	D	4	4.41667	3	611	12	11		4	422	235	1		3	444	250	1		4	422	235	1
47886	06	JHP_03_Jpa	15	444	F	2015	8	3	3	C	3	3.41667	3	611	12	11		3	444	235	1		5	485	250	1		3	444	235	1
47890	17	JHP_03_Jpa	16	485	F	2015	9	5	2	D	5	5.5	3	611	12	11		5	485	235	1		2	291	250	1		5	485	235	1
47895	07	JHP_03_Jpa	17	291	F	2015	9	2	2	D	2	2.5	3	611	12	11		2	291	235	1		2	338	250	1		2	291	235	1
47898	09	JHP_03_Jpa	18	338	F	2015	9	2	3	D	2	2.5	3	611	12	11		2	338	235	1		7	590	250	1		2	338	235	1
48007	12	JHP_03_Jpa	19	590	F	2015	5	6	2	D	7	7.16667	3	611	12	12		7	590	235	1		9	570	250	1		7	590	235	1
48022	15	JHP_03_Jpa	20	570	M	2015	6	9	2	E	9	9.25	3	611	12	12		9	570	235	1		4	455	250	1		9	570	235	1
48028	01	JHP_03_Jpa	21	455	F	2015	6	3	2	D	4	4.25	3	611	12	11		4	455	235	1		3	365	250	1		4	455	235	1
48028	04	JHP_03_Jpa	22	365	F	2015	6	3	1	D	3	3.25	3	611	12	11		3	365	235	1		4	415	250	1		3	365	235	1
48028	07	JHP_03_Jpa	23	415	F	2015	6	3	2	D	4	4.25	3	611	12	11		4	415	235	1		2	337	250	1		4	415	235	1
48035	05	JHP_03_Jpa	24	337	F	2015	6	2	2	D	2	2.25	3	611	12	12		2	337	235	1		6	510	250	1		2	337	235	1
48037	37	JHP_03_Jpa	25	510	M	2015	6	5	2	E	6	6.25	3	611	12	12		6	510	235	1		4	420	250	1		6	510	235	1
48037	38	JHP_03_Jpa	26	420	F	2015	6	3	3	D	4	4.25	3	611	12	12		4	420	235	1		8	625	250	1		4	420	235	1
48037	43	JHP_03_Jpa	27	625	F	2015	6	7	3	D	8	8.25	3	611	12	12		8	625	235	1		3	357	250	1		8	625	235	1
48039	02	JHP_03_Jpa	28	357	F	2015	6	2	4	C	3	3.25	3	611	12	12		3	357	235	1		2	305	250	1		3	357	235	1
48039	05	JHP_03_Jpa	29	305	F	2015	6	2	1	C	2	2.25	3	611	12	12		2	305	235	1		2	305	250	1		2	305	235	1
48039	08	JHP_03_Jpa	30	305	U	2015	6	2	2	C	2	2.25	3	611	12	12		2	305	235	1		12	670	250	1		2	305	235	1
48050	39	JHP_03_Jpa	31	670	M	2015	6	12	2	D	12	12.25	3	611	12	12		12	670	235	1		5	382	250	1		12	670	235	1
48053	41	JHP_03_Jpa	32	382	F	2015	6	4	3	E	5	5.25	3	611	12	12		5	382	235	1		5	507	250	1		5	382	235	1
48053	42	JHP_03_Jpa	33	507	F	2015	6	4	3	D	5	5.25	3	611	12	12		5	507	235	1		2	365	250	1		5	507	235	1
48061	01	JHP_03_Jpa	34	365	F	2015	7	2	2	D	2	2.33333	3	611	12	12		2	365	235	1		3	405	250	1		2	365	235	1
48076	07	JHP_03_Jpa	35	405	F	2015	8	3	2	D	3	3.41667	3	611	12	11		3	405	235	1		4	472	250	1		3	405	235	1
48077	05	JHP_03_Jpa	36	472	F	2015	8	4	4	D	4	4.41667	3	611	12	11		4	472	235	1		2	330	250	1		4	472	235	1
48079	50	JHP_03_Jpa	37	330	F	2015	8	2	2	D	2	2.41667	3	611	12	11		2	330	235	1		8	632	250	1		2	330	235	1
48091	31	JHP_03_Jpa	38	632	M	2015	8	8	2	E	8	8.41667	3	611	12	12		8	632	235	1		4	475	250	1		8	632	235	1
48091	42	JHP_03_Jpa	39	475	M	2015	8	5	4	D	4	4.41667	3	611	12	12		4	475	235	1		4	430	250	1		4	475	235	1
48091	43	JHP_03_Jpa	40	430	F	2015	8	4	4	D	4	4.41667	3	611	12	12		4	430	235	1		4	457	250	1		4	430	235	1
48091	55	JHP_03_Jpa	41	457	F	2015	8	4	2	C	4	4.41667	3	611	12	12		4	457	235	1		4	450	250	1		4	457	235	1
48091	69	JHP_03_Jpa	42	450	F	2015	8	4	2	D	4	4.41667	3	611	12	12		4	450	235	1		2	295	250	1		4	450	235	1
48093	01	JHP_03_Jpa	43	295	F	2015	8	2	4	C	2	2.41667	3	611	12	12		2	295	235	1		2	295	250	1		2	295	235	1
48093	02	JHP_03_Jpa	44	295	F	2015	8	2	2	C	2	2.41667	3	611	12	12		2	295	235	1		2	380	250	1		2	295	235	1
48093	06	JHP_03_Jpa	45	380	F	2015	8	2	3	C	2	2.41667	3	611	12	12		2	380	235	1		2	295	250	1		2	380	235	1
48093	09	JHP_03_Jpa	46	295	F	2015	8	2	4	D	2	2.41667	3	611	12	12		2	295	235	1		3	320	250	1		2	295	235	1
48093	10	JHP_03_Jpa	47	320	F	2015	8	3	2	E	3	3.41667	3	611	12	12		3	320	235	1		2	330	250	1		3	320	235	1
48093	28	JHP_03_Jpa	48	330	F	2015	8	2	3	D	2	2.41667	3	611	12	12		2	330	235	1		2	315	250	1		2	330	235	1
48093	29	JHP_03_Jpa	49	315	F	2015	8	2	2	D	2	2.41667	3	611	12	12		2	315	235	1		2	347	250	1		2	315	235	1
48400	14	JHP_03_Jpa	50	347	F	2015	8	2	2	D	2	2.41667	3	611	12	12		2	347	235	1		1	297	250	1		2	347	235	1
48408	17	JHP_03_Jpa	51	297	F	2015	8	1	3	D	1	1.41667	3	611	12	12		1	297	235	1		2	340	250	1		1	297	235	1
48418	02	JHP_03_Jpa	52	340	F	2015	9	2	3	D	2	2.5	3	611	12	12		2	340	235	1		3	445	250	1		2	340	235	1
48421	02	JHP_03_Jpa	53	445	F	2015	9	3	2	D	3	3.5	3	611	12	11		3	445	235	1		3	377	250	1		3	445	235	1
48424	02	JHP_03_Jpa	54	377	F	2015	9	3	2	D	3	3.5	3	611	12	12		3	377	235	1		5	525	250	1		3	377	235	1
48424	05	JHP_03_Jpa	55	525	M	2015	9	5	3	C	5	5.5	3	611	12	12		5	525	235	1		4	445	250	1		5	525	235	1
48424	27	JHP_03_Jpa	56	445	M	2015	9	4	3	D	4	4.5	3	611	12	12		4	445	235	1		3	520	250	1		4	445	235	1
48424	28	JHP_03_Jpa	57	520	F	2015	9	3	2	C	3	3.5	3	611	12	12		3	520	235	1		3	497	250	1		3	520	235	1
48424	29	JHP_03_Jpa	58	497	F	2015	9	3	3	C	3	3.5	3	611	12	12		3	497	235	1		7	640	250	1		3	497	235	1
48424	33	JHP_03_Jpa	59	640	M	2015	9	7	2	D	7	7.5	3	611	12	12		7	640	235	1		7	565	250	1		7	640	235	1
48424	38	JHP_03_Jpa	60	565	M	2015	9	6	2	D	7	7.5	3	611	12	12		7	565	235	1		6	540	250	1		7	565	235	1
48424	39	JHP_03_Jpa	61	540	F	2015	9	5	3	D	6	6.5	3	611	12	12		6	540	235	1		4	440	250	1		6	540	235	1
48430	03	JHP_03_Jpa	62	440	M	2015	9	5	2	D	4	4.5	3	611	12	12		4	440	235	1		8	470	250	1		4	440	235	1
48433	01	JHP_03_Jpa	63	470	F	2015	9	7	3	D	8	8.5	3	611	12	12		8	470	235	1		8	480	250	1		8	470	235	1
48433	16	JHP_03_Jpa	64	480	M	2015	9	8	2	C	8	8.5	3	611	12	12		8	480	235	1		3	395	250	1		8	480	235	1
48433	21	JHP_03_Jpa	65	395	F	2015	9	3	2	D	3	3.5	3	611	12	12		3	395	235	1		4	407	250	1		3	395	235	1
48434	06	JHP_03_Jpa	66	407	F	2015	9	4	2	C	4	4.5	3	611	12	12		4	407	235	1		6	420	250	1		4	407	235	1
48436	02	JHP_03_Jpa	67	420	M	2015	9	6	3	D	6	6.5	3	611	12	12		6	420	235	1		2	365	250	1		6	420	235	1
48437	30	JHP_03_Jpa	68	365	F	2015	9	2	2	C	2	2.5	3	611	12	12		2	365	235	1		1	270	250	1		2	365	235	1
48442	07	JHP_03_Jpa	69	270	F	2015	10	1	3	C	1	1.58333	3	611	12	12		1	270	235	1		3	362	250	1		1	270	235	1
48443	50	JHP_03_Jpa	70	362	F	2015	10	3	2	C	3	3.58333	3	611	12	12		3	362	235	1		1	255	250	1		3	362	235	1
48444	09	JHP_03_Jpa	71	255	F	2015	10	1	3	D	1	1.58333	3	611	12	12		1	255	235	1		3	395	250	1		1	255	235	1
48444	11	JHP_03_Jpa	72	395	F	2015	10	3	2	D	3	3.58333	3	611	12	12		3	395	235	1		3	402	250	1		3	395	235	1
48447	01	JHP_03_Jpa	73	402	F	2015	10	3	2	E	3	3.58333	3	611	12	12		3	402	235	1		1	322	250	1		3	402	235	1
48448	02	JHP_03_Jpa	74	322	U	2015	10	1	4	D	1	1.58333	3	611	12	12		1	322	235	1		2	377	250	1		1	322	235	1
48449	01	JHP_03_Jpa	75	377	F	2015	10	2	2	C	2	2.58333	3	611	12	12		2	377	235	1		1	375	250	1		2	377	235	1
48450	02	JHP_03_Jpa	76	375	F	2015	10	1	3	B	1	1.58333	3	611	12	12		1	375	235	1		2	330	250	1		1	375	235	1
48457	02	JHP_03_Jpa	77	330	F	2015	10	2	2	C	2	2.58333	3	611	12	12		2	330	235	1		2	355	250	1		2	330	235	1
48457	03	JHP_03_Jpa	78	355	F	2015	10	2	3	C	2	2.58333	3	611	12	12		2	355	235	1		2	325	250	1		2	355	235	1
48457	04	JHP_03_Jpa	79	325	F	2015	10	2	2	C	2	2.58333	3	611	12	12		2	325	235	1		3	345	250	1		2	325	235	1
48461	12	JHP_03_Jpa	80	345	F	2015	10	3	3	D	3	3.58333	3	611	12	12		3	345	235	1		2	325	250	1		3	345	235	1
48464	05	JHP_03_Jpa	81	325	F	2015	10	2	3	D	2	2.58333	3	611	12	12		2	325	235	1		4	440	250	1		2	325	235	1
48464	07	JHP_03_Jpa	82	440	F	2015	10	3	3	C	4	4.58333	3	611	12	12		4	440	235	1		4	445	250	1		4	440	235	1
48467	08	JHP_03_Jpa	83	445	F	2015	11	4	2	D	4	4.66667	3	611	12	12		4	445	235	1		4	397	250	1		4	445	235	1
48473	15	JHP_03_Jpa	84	397	F	2015	11	3	3	D	4	4.66667	3	611	12	12		4	397	235	1		2	385	250	1		4	397	235	1
48473	22	JHP_03_Jpa	85	385	F	2015	11	2	3	D	2	2.66667	3	611	12	12		2	385	235	1		2	355	250	1		2	385	235	1
48474	03	JHP_03_Jpa	86	355	F	2015	11	2	3	D	2	2.66667	3	611	12	12		2	355	235	1		1	275	250	1		2	355	235	1
48480	03	JHP_03_Jpa	87	275	F	2015	11	1	3	C	1	1.66667	3	611	12	12		1	275	235	1		1	282	250	1		1	275	235	1
48480	09	JHP_03_Jpa	88	282	F	2015	11	1	3	B	1	1.66667	3	611	12	12		1	282	235	1		1	305	250	1		1	282	235	1
48480	10	JHP_03_Jpa	89	305	F	2015	11	1	3	C	1	1.66667	3	611	12	12		1	305	235	1		1	310	250	1		1	305	235	1
48480	11	JHP_03_Jpa	90	310	F	2015	11	1	3	D	1	1.66667	3	611	12	12		1	310	235	1		2	365	250	1		1	310	235	1
48484	05	JHP_04_Jpa	1	365	F	2015	11	2	3	D	2	2.66667	3	611	12	12		2	365	235	1		2	330	250	1		2	365	235	1
48486	10	JHP_04_Jpa	2	330	F	2015	11	2	3	D	2	2.66667	3	611	12	12		2	330	235	1		1	290	250	1		2	330	235	1
48487	04	JHP_04_Jpa	3	290	F	2015	11	1	4	C	1	1.66667	3	611	12	12		1	290	235	1		2	345	250	1		1	290	235	1
48487	15	JHP_04_Jpa	4	345	F	2015	11	2	3	C	2	2.66667	3	611	12	12		2	345	235	1		1	297	250	1		2	345	235	1
48487	16	JHP_04_Jpa	5	297	F	2015	11	1	3	C	1	1.66667	3	611	12	12		1	297	235	1		1	280	250	1		1	297	235	1
48487	52	JHP_04_Jpa	6	280	F	2015	11	1	4	C	1	1.66667	3	611	12	12		1	280	235	1		5	405	250	1		1	280	235	1
48492	08	JHP_04_Jpa	7	405	F	2015	11	5	3	D	5	5.66667	3	611	12	12		5	405	235	1		2	345	250	1		5	405	235	1
48496	06	JHP_04_Jpa	8	345	F	2015	11	2	3	C	2	2.66667	3	611	12	11		2	345	235	1		2	345	250	1		2	345	235	1
48498	07	JHP_04_Jpa	9	345	F	2015	12	2	3	C	2	2.75	3	611	12	12		2	345	235	1		2	310	250	1		2	345	235	1
48498	08	JHP_04_Jpa	10	310	U	2015	12	2	3	D	2	2.75	3	611	12	12		2	310	235	1		2	332	250	1		2	310	235	1
48505	01	JHP_04_Jpa	11	332	F	2015	9	2	3	C	2	2.5	3	611	12	11		2	332	235	1		2	354	250	1		2	332	235	1
48505	02	JHP_04_Jpa	12	354	F	2015	9	2	2	D	2	2.5	3	611	12	11		2	354	235	1		2	352	250	1		2	354	235	1
48511	13	JHP_04_Jpa	13	352	F	2015	10	2	3	D	2	2.58333	3	611	12	11		2	352	235	1		2	339	250	1		2	352	235	1
48516	16	JHP_04_Jpa	14	339	F	2015	10	2	3	D	2	2.58333	3	611	12	11		2	339	235	1		2	322	250	1		2	339	235	1
48534	07	JHP_04_Jpa	15	322	F	2015	11	2	3	D	2	2.66667	3	611	12	11		2	322	235	1		2	323	250	1		2	322	235	1
48544	03	JHP_04_Jpa	16	323	F	2015	12	2	4	D	2	2.75	3	611	12	11		2	323	235	1		2	329	250	1		2	323	235	1
48545	17	JHP_04_Jpa	17	329	F	2015	12	2	3	D	2	2.75	3	611	12	11		2	329	235	1		2	367	250	1		2	329	235	1
48546	08	JHP_04_Jpa	18	367	F	2015	12	2	3	C	2	2.75	3	611	12	11		2	367	235	1		2	347	250	1		2	367	235	1
48549	17	JHP_04_Jpa	19	347	F	2015	12	2	2	D	2	2.75	3	611	12	11		2	347	235	1		3	413	250	1		2	347	235	1
48551	15	JHP_04_Jpa	20	413	F	2015	12	3	3	D	3	3.75	3	611	12	11		3	413	235	1		2	283	250	1		3	413	235	1
48558	03	JHP_04_Jpa	21	283	F	2015	12	2	3	C	2	2.75	3	611	12	11		2	283	235	1		1	349	250	1		2	283	235	1
48558	04	JHP_04_Jpa	22	349	F	2015	12	1	4	C	1	1.75	3	611	12	11		1	349	235	1		6	527	250	1		1	349	235	1
48802	04	JHP_04_Jpa	23	527	M	2015	12	6	3	C	6	6.75	3	611	12	12		6	527	235	1		2	347	250	1		6	527	235	1
48803	04	JHP_04_Jpa	24	347	F	2015	12	2	3	D	2	2.75	3	611	12	12		2	347	235	1		3	412	250	1		2	347	235	1
48806	01	JHP_04_Jpa	25	412	F	2015	12	3	2	C	3	3.75	3	611	12	12		3	412	235	1		4	395	250	1		3	412	235	1
48806	02	JHP_04_Jpa	26	395	F	2015	12	4	3	D	4	4.75	3	611	12	12		4	395	235	1		2	380	250	1		4	395	235	1
48806	03	JHP_04_Jpa	27	380	F	2015	12	2	4	C	2	2.75	3	611	12	12		2	380	235	1		4	452	250	1		2	380	235	1
48806	04	JHP_04_Jpa	28	452	F	2015	12	4	2	D	4	4.75	3	611	12	12		4	452	235	1		4	415	250	1		4	452	235	1
48806	05	JHP_04_Jpa	29	415	F	2015	12	4	2	D	4	4.75	3	611	12	12		4	415	235	1		7	445	250	1		4	415	235	1
48806	06	JHP_04_Jpa	30	445	F	2015	12	5	3	D	7	7.75	3	611	12	12		7	445	235	1		6	445	250	1		7	445	235	1
48808	08	JHP_04_Jpa	31	445	F	2015	12	5	3	D	6	6.75	3	611	12	12		6	445	235	1		2	335	250	1		6	445	235	1
48812	14	JHP_04_Jpa	32	335	F	2015	12	2	3	D	2	2.75	3	611	12	12		2	335	235	1		1	332	250	1		2	335	235	1
48812	15	JHP_04_Jpa	33	332	F	2015	12	1	4	D	1	1.75	3	611	12	12		1	332	235	1		2	345	250	1		1	332	235	1
48812	16	JHP_04_Jpa	34	345	F	2015	12	2	3	D	2	2.75	3	611	12	12		2	345	235	1		1	290	250	1		2	345	235	1
48813	01	JHP_04_Jpa	35	290	F	2015	12	1	4	B	1	1.75	3	611	12	12		1	290	235	1		2	375	250	1		1	290	235	1
48815	06	JHP_04_Jpa	36	375	F	2015	12	2	3	D	2	2.75	3	611	12	12		2	375	235	1		2	289	250	1		2	375	235	1
48564	27	JHP_04_Jpa	37	289	U	2016	1	1	4	D	2	1.83333	3	611	12	11		2	289	235	1		2	337	250	1		2	289	235	1
48576	14	JHP_04_Jpa	38	337	F	2016	1	2	3	C	2	1.83333	3	611	12	11		2	337	235	1		2	278	250	1		2	337	235	1
48584	03	JHP_04_Jpa	39	278	F	2016	2	1	4	D	2	1.91667	3	611	12	11		2	278	235	1		3	359	250	1		2	278	235	1
48592	06	JHP_04_Jpa	40	359	F	2016	2	2	3	D	3	2.91667	3	611	12	11		3	359	235	1		3	351	250	1		3	359	235	1
48592	21	JHP_04_Jpa	41	351	F	2016	2	2	4	D	3	2.91667	3	611	12	11		3	351	235	1		3	370	250	1		3	351	235	1
48593	12	JHP_04_Jpa	42	370	F	2016	2	2	4	E	3	2.91667	3	611	12	11		3	370	235	1		6	490	250	1		3	370	235	1
48593	13	JHP_04_Jpa	43	490	M	2016	2	5	4	E	6	5.91667	3	611	12	11		6	490	235	1		6	445	250	1		6	490	235	1
48825	04	JHP_04_Jpa	44	445	M	2016	1	5	4	C	6	5.83333	3	611	12	12		6	445	235	1		4	410	250	1		6	445	235	1
48826	04	JHP_04_Jpa	45	410	F	2016	1	3	3	D	4	3.83333	3	611	12	12		4	410	235	1		3	365	250	1		4	410	235	1
48826	05	JHP_04_Jpa	46	365	F	2016	1	2	3	C	3	2.83333	3	611	12	12		3	365	235	1		3	360	250	1		3	365	235	1
48826	07	JHP_04_Jpa	47	360	F	2016	1	2	4	C	3	2.83333	3	611	12	12		3	360	235	1		3	345	250	1		3	360	235	1
48826	08	JHP_04_Jpa	48	345	F	2016	1	2	4	D	3	2.83333	3	611	12	12		3	345	235	1		4	415	250	1		3	345	235	1
48826	09	JHP_04_Jpa	49	415	F	2016	1	3	3	D	4	3.83333	3	611	12	12		4	415	235	1		4	402	250	1		4	415	235	1
48826	36	JHP_04_Jpa	50	402	F	2016	1	3	3	C	4	3.83333	3	611	12	12		4	402	235	1		7	585	250	1		4	402	235	1
48830	01	JHP_04_Jpa	51	585	M	2016	1	6	3	D	7	6.83333	3	611	12	12		7	585	235	1		6	497	250	1		7	585	235	1
48830	02	JHP_04_Jpa	52	497	M	2016	1	5	4	D	6	5.83333	3	611	12	12		6	497	235	1		5	452	250	1		6	497	235	1
48839	08	JHP_04_Jpa	53	452	F	2016	1	4	4	D	5	4.83333	3	611	12	12		5	452	235	1		3	400	250	1		5	452	235	1
48839	12	JHP_04_Jpa	54	400	F	2016	1	2	4	C	3	2.83333	3	611	12	12		3	400	235	1		3	380	250	1		3	400	235	1
48842	21	JHP_04_Jpa	55	380	F	2016	1	2	3	D	3	2.83333	3	611	12	12		3	380	235	1		4	375	250	1		3	380	235	1
48842	29	JHP_04_Jpa	56	375	F	2016	1	3	3	D	4	3.83333	3	611	12	12		4	375	235	1		2	320	250	1		4	375	235	1
48847	16	JHP_04_Jpa	57	320	F	2016	1	1	4	C	2	1.83333	3	611	12	12		2	320	235	1		3	395	250	1		2	320	235	1
48850	03	JHP_04_Jpa	58	395	F	2016	1	2	3	D	3	2.83333	3	611	12	12		3	395	235	1		4	342	250	1		3	395	235	1
48850	05	JHP_04_Jpa	59	342	F	2016	1	3	3	D	4	3.83333	3	611	12	12		4	342	235	1		6	380	250	1		4	342	235	1
48850	07	JHP_04_Jpa	60	380	F	2016	1	5	3	E	6	5.83333	3	611	12	12		6	380	235	1		3	415	250	1		6	380	235	1
48850	08	JHP_04_Jpa	61	415	F	2016	1	3	3	D	3	2.83333	3	611	12	12		3	415	235	1		3	365	250	1		3	415	235	1
48850	09	JHP_04_Jpa	62	365	F	2016	1	3	2	D	3	2.83333	3	611	12	12		3	365	235	1		2	300	250	1		3	365	235	1
48857	25	JHP_04_Jpa	63	300	F	2016	1	1	4	C	2	1.83333	3	611	12	12		2	300	235	1		2	305	250	1		2	300	235	1
48858	15	JHP_04_Jpa	64	305	F	2016	1	1	3	C	2	1.83333	3	611	12	12		2	305	235	1		3	320	250	1		2	305	235	1
48858	27	JHP_04_Jpa	65	320	F	2016	1	2	3	D	3	2.83333	3	611	12	12		3	320	235	1		4	430	250	1		3	320	235	1
48861	07	JHP_04_Jpa	66	430	M	2016	2	3	4	D	4	3.91667	3	611	12	12		4	430	235	1		3	387	250	1		4	430	235	1
48861	08	JHP_04_Jpa	67	387	F	2016	2	2	4	D	3	2.91667	3	611	12	12		3	387	235	1		4	427	250	1		3	387	235	1
48861	09	JHP_04_Jpa	68	427	M	2016	2	3	4	D	4	3.91667	3	611	12	12		4	427	235	1		5	387	250	1		4	427	235	1
48861	10	JHP_04_Jpa	69	387	F	2016	2	4	3	C	5	4.91667	3	611	12	12		5	387	235	1		2	272	250	1		5	387	235	1
48862	22	JHP_04_Jpa	70	272	F	2016	2	1	4	C	2	1.91667	3	611	12	12		2	272	235	1		2	297	250	1		2	272	235	1
48866	08	JHP_04_Jpa	71	297	F	2016	2	1	3	D	2	1.91667	3	611	12	12		2	297	235	1		3	342	250	1		2	297	235	1
48866	13	JHP_04_Jpa	72	342	F	2016	2	2	3	D	3	2.91667	3	611	12	12		3	342	235	1		2	310	250	1		3	342	235	1
48866	16	JHP_04_Jpa	73	310	F	2016	2	1	4	D	2	1.91667	3	611	12	12		2	310	235	1		6	515	250	1		2	310	235	1
48870	02	JHP_04_Jpa	74	515	M	2016	2	4	4	C	6	5.91667	3	611	12	12		6	515	235	1		3	360	250	1		6	515	235	1
48870	33	JHP_04_Jpa	75	360	F	2016	2	2	3	D	3	2.91667	3	611	12	12		3	360	235	1		3	347	250	1		3	360	235	1
48873	01	JHP_04_Jpa	76	347	F	2016	2	2	3	D	3	2.91667	3	611	12	12		3	347	235	1		3	350	250	1		3	347	235	1
48873	12	JHP_04_Jpa	77	350	F	2016	2	2	4	E	3	2.91667	3	611	12	12		3	350	235	1		2	317	250	1		3	350	235	1
48873	13	JHP_04_Jpa	78	317	F	2016	2	1	4	D	2	1.91667	3	611	12	12		2	317	235	1		4	387	250	1		2	317	235	1
48875	43	JHP_04_Jpa	79	387	F	2016	2	3	4	E	4	3.91667	3	611	12	12		4	387	235	1		2	302	250	1		4	387	235	1
48876	05	JHP_04_Jpa	80	302	F	2016	2	1	4	D	2	1.91667	3	611	12	12		2	302	235	1		3	400	250	1		2	302	235	1
48876	06	JHP_04_Jpa	81	400	F	2016	2	2	4	D	3	2.91667	3	611	12	12		3	400	235	1		3	360	250	1		3	400	235	1
48876	22	JHP_04_Jpa	82	360	F	2016	2	2	4	D	3	2.91667	3	611	12	12		3	360	235	1		2	325	250	1		3	360	235	1
48876	32	JHP_04_Jpa	83	325	F	2016	2	1	4	D	2	1.91667	3	611	12	12		2	325	235	1		2	325	250	1		2	325	235	1
48876	44	JHP_04_Jpa	84	325	M	2016	2	1	4	C	2	1.91667	3	611	12	12		2	325	235	1		6	462	250	1		2	325	235	1
48877	03	JHP_04_Jpa	85	462	M	2016	2	5	3	E	6	5.91667	3	611	12	12		6	462	235	1		7	445	250	1		6	462	235	1
48877	04	JHP_04_Jpa	86	445	F	2016	2	5	4	D	7	6.91667	3	611	12	12		7	445	235	1		3	380	250	1		7	445	235	1
48878	05	JHP_04_Jpa	87	380	F	2016	2	2	3	C	3	2.91667	3	611	12	12		3	380	235	1		3	370	250	1		3	380	235	1
48878	06	JHP_04_Jpa	88	370	F	2016	2	2	4	D	3	2.91667	3	611	12	12		3	370	235	1		2	320	250	1		3	370	235	1
48878	07	JHP_04_Jpa	89	320	F	2016	2	1	4	D	2	1.91667	3	611	12	12		2	320	235	1		2	293	250	1		2	320	235	1
48901	09	JHP_04_Jpa	90	293	F	2016	3	1	4	D	2	2	3	611	12	11		2	293	235	1		3	284	250	1		2	293	235	1
48903	08	JHP_05_Jpa	1	284	M	2016	3	2	4	d	3	3	3	611	12	11		3	284	235	1		2	256	250	1		3	284	235	1
48904	01	JHP_05_Jpa	2	256	F	2016	3	1	4	C	2	2	3	611	12	11		2	256	235	1		3	316	250	1		2	256	235	1
48905	04	JHP_05_Jpa	3	316	F	2016	3	2	4	D	3	3	3	611	12	11		3	316	235	1		3	325	250	1		3	316	235	1
48909	01	JHP_05_Jpa	4	325	F	2016	3	2	4	D	3	3	3	611	12	11		3	325	235	1		2	301	250	1		3	325	235	1
48909	02	JHP_05_Jpa	5	301	F	2016	3	1	4	B	2	2	3	611	12	11		2	301	235	1		4	352	250	1		2	301	235	1
48915	21	JHP_05_Jpa	6	352	F	2016	3	3	4	D	4	4	3	611	12	11		4	352	235	1		3	316	250	1		4	352	235	1
48920	01	JHP_05_Jpa	7	316	F	2016	3	3	1	D	3	3	3	611	12	11		3	316	235	1		2	313	250	1		3	316	235	1
48920	02	JHP_05_Jpa	8	313	F	2016	3	1	4	C	2	2	3	611	12	11		2	313	235	1		2	299	250	1		2	313	235	1
48920	05	JHP_05_Jpa	9	299	F	2016	3	1	4	C	2	2	3	611	12	11		2	299	235	1		3	365	250	1		2	299	235	1
48922	11	JHP_05_Jpa	10	365	F	2016	3	3	1	C	3	3	3	611	12	11		3	365	235	1		3	380	250	1		3	365	235	1
48926	01	JHP_05_Jpa	11	380	F	2016	4	2	4	C	3	3.08333	3	611	12	11		3	380	235	1		3	357	250	1		3	380	235	1
48930	16	JHP_05_Jpa	12	357	F	2016	4	2	4	B	3	3.08333	3	611	12	11		3	357	235	1		2	305	250	1		3	357	235	1
48940	07	JHP_05_Jpa	13	305	F	2016	4	1	4	B	2	2.08333	3	611	12	11		2	305	235	1		1	250	250	1		2	305	235	1
FL1573620151129001	KY1500843	JHP_05_Jpa	14	250	M	2015	11	1	3	B	1	1.66667	2	610	12	748		1	250	235	1		2	311.711	250	1		1	250	235	1
	20151832086	JHP_05_Jpa	15	311.711		2015	9	2	2	C	2	2.5	CM HL	611	FL	12		2	311.711	235	1		2	344.561	250	1		2	311.711	235	1
	20151832087	JHP_05_Jpa	16	344.561		2015	9	2	3	D	2	2.5	CM HL	611	FL	12		2	344.561	235	1		2	324.851	250	1		2	344.561	235	1
	20151832088	JHP_05_Jpa	17	324.851		2015	9	2	2	C	2	2.5	CM HL		FL	12		2	324.851	235	1		1	284.336	250	1		2	324.851	235	1
	20151832089	JHP_05_Jpa	18	284.336		2015	9	1	2	D	1	1.5	CM HL		FL	12		1	284.336	235	1		2	336.896	250	1		1	284.336	235	1
	20151832090	JHP_05_Jpa	19	336.896		2015	9	2	2	C	2	2.5	CM HL		FL	12		2	336.896	235	1		2	353.321	250	1		2	336.896	235	1
	20151832091	JHP_05_Jpa	20	353.321		2015	9	2	2	E	2	2.5	CM HL		FL	12		2	353.321	235	1		3	469.391	250	1		2	353.321	235	1
	20151830481	JHP_05_Jpa	21	469.391		2015	4	3	2	C	3	3.08333	CM SPEARS		FL	11		3	469.391	235	1		4	457	250	1		3	469.391	235	1
092215DT001	1	JHP_05_Jpa	22	457	F	2015	9	4	2	D	4	4.5	2	611	12	12		4	457	235	1		6	599	250	1		4	457	235	1
092215DT001	2	JHP_05_Jpa	23	599	F	2015	9	7	3	C	6	6.5	2	611	12	12		6	599	235	1		4	453	250	1		6	599	235	1
092215DT001	3	JHP_05_Jpa	24	453	F	2015	9	4	2	D	4	4.5	2	611	12	12		4	453	235	1		6	513	250	1		4	453	235	1
092215DT001	4	JHP_05_Jpa	25	513	F	2015	9	6	2	D	6	6.5	2	611	12	12		6	513	235	1		8	596	250	1		6	513	235	1
092215DT001	5	JHP_05_Jpa	26	596	F	2015	9	8	2	F	8	8.5	2	611	12	12		8	596	235	1		6	586	250	1		8	596	235	1
092215DT001	6	JHP_05_Jpa	27	586	F	2015	9	6	3	D	6	6.5	2	611	12	12		6	586	235	1		3	345	250	1		6	586	235	1
48568	15	JHP_05_Jpa	29	345	F	2016	1	2	3	B	3	2.83333	3	611	12	11		3	345	235	1		4	320	250	1		3	345	235	1
48572	19	JHP_05_Jpa	30	320	M	2016	1	2	3	C	4	3.83333	3	611	12	11		4	320	235	1		2	286	250	1		4	320	235	1
48577	10	JHP_05_Jpa	31	286	F	2016	1	1	4	D	2	1.83333	3	611	12	11		2	286	235	1		3	391	250	1		2	286	235	1
48581	08	JHP_05_Jpa	32	391	F	2016	2	2	3	C	3	2.91667	3	611	12	11		3	391	235	1		5	449	250	1		3	391	235	1
48583	18	JHP_05_Jpa	33	449	F	2016	2	4	4	D	5	4.91667	3	611	12	11		5	449	235	1		2	304	250	1		5	449	235	1
48586	19	JHP_05_Jpa	34	304	F	2016	2	1	4	E	2	1.91667	3	611	12	11		2	304	235	1		4	445	250	1		2	304	235	1
48587	05	JHP_05_Jpa	35	445	F	2016	2	3	4	C	4	3.91667	3	611	12	11		4	445	235	1		2	316	250	1		4	445	235	1
48590	07	JHP_05_Jpa	36	316	F	2016	2	1	3	C	2	1.91667	3	611	12	11		2	316	235	1		2	280	250	1		2	316	235	1
48595	02	JHP_05_Jpa	37	280	F	2016	2	1	4	D	2	1.91667	3	611	12	11		2	280	235	1		3	356	250	1		2	280	235	1
48598	08	JHP_05_Jpa	38	356	F	2016	2	2	4	C	3	2.91667	3	611	12	11		3	356	235	1		2	321	250	1		3	356	235	1
48598	09	JHP_05_Jpa	39	321	F	2016	2	1	4	C	2	1.91667	3	611	12	11		2	321	235	1		4	357	250	1		2	321	235	1
48884	02	JHP_05_Jpa	40	357	F	2016	2	3	4	C	4	3.91667	3	611	12	12		4	357	235	1		3	410	250	1		4	357	235	1
48888	18	JHP_05_Jpa	41	410	F	2016	2	2	4	C	3	2.91667	3	611	12	12		3	410	235	1		3	375	250	1		3	410	235	1
48891	14	JHP_05_Jpa	42	375	F	2016	2	2	4	C	3	2.91667	3	611	12	12		3	375	235	1		3	315	250	1		3	375	235	1
48891	15	JHP_05_Jpa	43	315	F	2016	2	2	4	D	3	2.91667	3	611	12	12		3	315	235	1		2	347	250	1		3	315	235	1
48891	17	JHP_05_Jpa	44	347	M	2016	2	1	4	E	2	1.91667	3	611	12	12		2	347	235	1		5	522	250	1		2	347	235	1
48891	18	JHP_05_Jpa	45	522	M	2016	2	4	3	C	5	4.91667	3	611	12	12		5	522	235	1		3	335	250	1		5	522	235	1
48891	22	JHP_05_Jpa	46	335	F	2016	2	2	4	C	3	2.91667	3	611	12	12		3	335	235	1		3	312	250	1		3	335	235	1
48891	34	JHP_05_Jpa	47	312	F	2016	2	3	3	C	3	2.91667	3	611	12	12		3	312	235	1		3	345	250	1		3	312	235	1
48891	35	JHP_05_Jpa	48	345	F	2016	2	2	4	D	3	2.91667	3	611	12	12		3	345	235	1		3	412	250	1		3	345	235	1
48893	03	JHP_05_Jpa	49	412	F	2016	2	2	3	D	3	2.91667	3	611	12	12		3	412	235	1		3	377	250	1		3	412	235	1
48893	05	JHP_05_Jpa	50	377	F	2016	2	2	3	D	3	2.91667	3	611	12	12		3	377	235	1		4	375	250	1		3	377	235	1
48893	09	JHP_05_Jpa	51	375	F	2016	2	2	3	B	4	3.91667	3	611	12	12		4	375	235	1		2	320	250	1		4	375	235	1
48897	01	JHP_05_Jpa	52	320	F	2016	2	1	4	C	2	1.91667	3	611	12	12		2	320	235	1		2	317	250	1		2	320	235	1
48897	23	JHP_05_Jpa	53	317	F	2016	2	1	4	D	2	1.91667	3	611	12	12		2	317	235	1		2	304	250	1		2	317	235	1
48941	19	JHP_05_Jpa	54	304	F	2016	5	1	4	D	2	2.16667	3	611	12	11		2	304	235	1		2	313	250	1		2	304	235	1
48944	11	JHP_05_Jpa	55	313	F	2016	5	1	4	D	2	2.16667	3	611	12	11		2	313	235	1		2	310	250	1		2	313	235	1
48948	10	JHP_05_Jpa	56	310	F	2016	5	2	1	D	2	2.16667	3	611	12	11		2	310	235	1		3	377	250	1		2	310	235	1
48949	12	JHP_05_Jpa	57	377	F	2016	5	2	1	D	3	3.16667	3	611	12	11		3	377	235	1		4	395	250	1		3	377	235	1
48949	19	JHP_05_Jpa	58	395	F	2016	5	3	2	E	4	4.16667	3	611	12	11		4	395	235	1		2	304	250	1		4	395	235	1
48951	06	JHP_05_Jpa	59	304	F	2016	5	1	4	C	2	2.16667	3	611	12	11		2	304	235	1		5	393	250	1		2	304	235	1
48951	13	JHP_05_Jpa	60	393	M	2016	5	4	2	D	5	5.16667	3	611	12	11		5	393	235	1		2	290	250	1		5	393	235	1
48951	34	JHP_05_Jpa	61	290	F	2016	5	2	2	C	2	2.16667	3	611	12	11		2	290	235	1		2	327	250	1		2	290	235	1
48952	09	JHP_05_Jpa	62	327	F	2016	5	2	1	C	2	2.16667	3	611	12	11		2	327	235	1		2	340	250	1		2	327	235	1
48953	05	JHP_05_Jpa	63	340	F	2016	5	1	4	D	2	2.16667	3	611	12	11		2	340	235	1		2	317	250	1		2	340	235	1
48953	08	JHP_05_Jpa	64	317	F	2016	5	2	1	C	2	2.16667	3	611	12	11		2	317	235	1		4	445	250	1		2	317	235	1
48954	07	JHP_05_Jpa	65	445	F	2016	5	3	2	C	4	4.16667	3	611	12	11		4	445	235	1		2	301	250	1		4	445	235	1
48954	28	JHP_05_Jpa	66	301	F	2016	5	1	4	C	2	2.16667	3	611	12	11		2	301	235	1		2	351	250	1		2	301	235	1
48957	06	JHP_05_Jpa	67	351	F	2016	5	2	2	B	2	2.16667	3	611	12	11		2	351	235	1		7	461	250	1		2	351	235	1
48961	01	JHP_05_Jpa	68	461	M	2016	5	6	2	D	7	7.16667	3	611	12	11		7	461	235	1		2	315	250	1		7	461	235	1
49300	06	JHP_05_Jpa	69	315	F	2016	2	1	4	D	2	1.91667	3	611	12	12		2	315	235	1		2	285	250	1		2	315	235	1
49300	11	JHP_05_Jpa	70	285	F	2016	2	1	4	D	2	1.91667	3	611	12	12		2	285	235	1		4	440	250	1		2	285	235	1
49301	03	JHP_05_Jpa	71	440	M	2016	2	3	4	D	4	3.91667	3	611	12	12		4	440	235	1		3	370	250	1		4	440	235	1
49301	04	JHP_05_Jpa	72	370	F	2016	2	2	3	C	3	2.91667	3	611	12	12		3	370	235	1		3	352	250	1		3	370	235	1
49301	09	JHP_05_Jpa	73	352	F	2016	2	2	4	D	3	2.91667	3	611	12	12		3	352	235	1		2	330	250	1		3	352	235	1
49304	01	JHP_05_Jpa	74	330	F	2016	3	1	4	C	2	2	3	611	12	12		2	330	235	1		3	352	250	1		2	330	235	1
49305	04	JHP_05_Jpa	75	352	F	2016	3	2	4	D	3	3	3	611	12	12		3	352	235	1		4	455	250	1		3	352	235	1
49305	10	JHP_05_Jpa	76	455	M	2016	3	3	4	D	4	4	3	611	12	12		4	455	235	1		5	411	250	1		4	455	235	1
49305	11	JHP_05_Jpa	77	411	F	2016	3	4	4	D	5	5	3	611	12	12		5	411	235	1		2	317	250	1		5	411	235	1
49314	06	JHP_05_Jpa	78	317	F	2016	3	1	4	C	2	2	3	611	12	12		2	317	235	1		3	340	250	1		2	317	235	1
49317	22	JHP_05_Jpa	79	340	F	2016	3	2	4	C	3	3	3	611	12	12		3	340	235	1		4	447	250	1		3	340	235	1
49320	12	JHP_05_Jpa	80	447	F	2016	3	4	1	C	4	4	3	611	12	11		4	447	235	1		2	292	250	1		4	447	235	1
49321	14	JHP_05_Jpa	81	292	F	2016	3	1	4	C	2	2	3	611	12	12		2	292	235	1		2	342	250	1		2	292	235	1
49323	10	JHP_05_Jpa	82	342	F	2016	3	2	2	C	2	2	3	611	12	12		2	342	235	1		3	375	250	1		2	342	235	1
49330	01	JHP_05_Jpa	83	375	F	2016	3	2	4	C	3	3	3	611	12	12		3	375	235	1		12	680	250	1		3	375	235	1
49333	13	JHP_05_Jpa	84	680	M	2016	3	10	2	C	12	12	3	611	12	12		12	680	235	1		4	415	250	1		12	680	235	1
49333	18	JHP_05_Jpa	85	415	M	2016	3	3	4	C	4	4	3	611	12	12		4	415	235	1		7	605	250	1		4	415	235	1
49333	23	JHP_05_Jpa	86	605	F	2016	3	7	1	D	7	7	3	611	12	12		7	605	235	1		7	410	250	1		7	605	235	1
49333	29	JHP_05_Jpa	87	410	M	2016	3	6	2	C	7	7	3	611	12	12		7	410	235	1		5	480	250	1		7	410	235	1
49333	35	JHP_05_Jpa	88	480	M	2016	3	5	2	C	5	5	3	611	12	12		5	480	235	1		5	500	250	1		5	480	235	1
49344	06	JHP_05_Jpa	89	500	M	2016	4	4	4	C	5	5.08333	3	611	12	12		5	500	235	1		6	432	250	1		5	500	235	1
49345	04	JHP_05_Jpa	90	432	F	2016	4	6	1	D	6	6.08333	3	611	12	12		6	432	235	1		5	480	250	1		6	432	235	1
49345	14	JHP_06_Jpa	1	480	M	2016	4	6	1	D	5	5.08333	3	611	12	12		5	480	235	1		3	397	250	1		5	480	235	1
49345	17	JHP_06_Jpa	2	397	F	2016	4	2	4	B	3	3.08333	3	611	12	12		3	397	235	1		5	545	250	1		3	397	235	1
49345	21	JHP_06_Jpa	3	545	M	2016	4	7	1	C	5	5.08333	3	611	12	12		5	545	235	1		3	430	250	1		5	545	235	1
49345	23	JHP_06_Jpa	4	430	F	2016	4	3	2	C	3	3.08333	3	611	12	12		3	430	235	1		3	380	250	1		3	430	235	1
49345	65	JHP_06_Jpa	5	380	F	2016	4	2	4	C	3	3.08333	3	611	12	12		3	380	235	1		4	420	250	1		3	380	235	1
49345	66	JHP_06_Jpa	6	420	M	2016	4	3	4	D	4	4.08333	3	611	12	12		4	420	235	1		3	465	250	1		4	420	235	1
49345	67	JHP_06_Jpa	7	465	F	2016	4	3	3	C	3	3.08333	3	611	12	12		3	465	235	1		6	485	250	1		3	465	235	1
49345	82	JHP_06_Jpa	8	485	M	2016	4	6	1	C	6	6.08333	3	611	12	12		6	485	235	1		5	407	250	1		6	485	235	1
49345	85	JHP_06_Jpa	9	407	F	2016	4	4	2	C	5	5.08333	3	611	12	12		5	407	235	1		2	287	250	1		5	407	235	1
49347	08	JHP_06_Jpa	10	287	F	2016	4	1	4	B	2	2.08333	3	611	12	12		2	287	235	1		3	350	250	1		2	287	235	1
49347	09	JHP_06_Jpa	11	350	F	2016	4	2	3	D	3	3.08333	3	611	12	12		3	350	235	1		3	390	250	1		3	350	235	1
49354	02	JHP_06_Jpa	12	390	F	2016	4	2	2	C	3	3.08333	3	611	12	12		3	390	235	1		2	307	250	1		3	390	235	1
49358	03	JHP_06_Jpa	13	307	F	2016	4	1	4	E	2	2.08333	3	611	12	12		2	307	235	1		2	332	250	1		2	307	235	1
49358	04	JHP_06_Jpa	14	332	F	2016	4	1	4	D	2	2.08333	3	611	12	12		2	332	235	1		2	325	250	1		2	332	235	1
49361	04	JHP_06_Jpa	15	325	F	2016	4	1	4	C	2	2.08333	3	611	12	12		2	325	235	1		3	330.326	250	1		2	325	235	1
20161830196		JHP_06_Jpa	16	330.326		2016	3	2	4	C	3	3	CM	611	12	12		3	330.326	235	1		2	314.996	250	1		3	330.326	235	1
20161830197		JHP_06_Jpa	17	314.996		2016	3	1	4	C	2	2	CM	611	12	12		2	314.996	235	1		2	301.856	250	1		2	314.996	235	1
20161830198		JHP_06_Jpa	18	301.856		2016	3	1	4	C	2	2	CM	611	12	12		2	301.856	235	1		2	284.336	250	1		2	301.856	235	1
20161830199		JHP_06_Jpa	19	284.336		2016	3	1	4	D	2	2	CM	611	12	12		2	284.336	235	1		2	305.141	250	1		2	284.336	235	1
20161830200		JHP_06_Jpa	20	305.141		2016	3	1	4	D	2	2	CM	611	12	12		2	305.141	235	1		2	300.761	250	1		2	305.141	235	1
20161830201		JHP_06_Jpa	21	300.761		2016	3	1	4	D	2	2	CM	611	12	12		2	300.761	235	1		2	295.286	250	1		2	300.761	235	1
20161830202		JHP_06_Jpa	22	295.286		2016	3	1	4	D	2	2	CM	611	12	12		2	295.286	235	1		2	317.186	250	1		2	295.286	235	1
20161830203		JHP_06_Jpa	23	317.186		2016	3	1	4	E	2	2	CM	611	12	12		2	317.186	235	1		2	318.281	250	1		2	317.186	235	1
20161830204		JHP_06_Jpa	24	318.281		2016	3	1	4	D	2	2	CM	611	12	12		2	318.281	235	1		2	295.286	250	1		2	318.281	235	1
20161830205		JHP_06_Jpa	25	295.286		2016	3	1	4	E	2	2	CM	611	12	12		2	295.286	235	1		2	313.901	250	1		2	295.286	235	1
20161830206		JHP_06_Jpa	26	313.901		2016	3	1	4	D	2	2	CM	611	12	12		2	313.901	235	1		2	310.616	250	1		2	313.901	235	1
20161830207		JHP_06_Jpa	27	310.616		2016	3	1	4	D	2	2	CM	611	12	12		2	310.616	235	1		2	300.761	250	1		2	310.616	235	1
20161830208		JHP_06_Jpa	28	300.761		2016	3	1	4	C	2	2	CM	611	12	12		2	300.761	235	1		3	351.131	250	1		2	300.761	235	1
20161830209		JHP_06_Jpa	29	351.131		2016	3	2	3	C	3	3	CM	611	12	12		3	351.131	235	1		3	378.506	250	1		3	351.131	235	1
20161830210		JHP_06_Jpa	30	378.506		2016	3	2	4	D	3	3	CM	611	12	12		3	378.506	235	1		3	394.931	250	1		3	378.506	235	1
20161830211		JHP_06_Jpa	31	394.931		2016	3	2	4	D	3	3	CM	611	12	12		3	394.931	235	1		3	355.511	250	1		3	394.931	235	1
20161830212		JHP_06_Jpa	32	355.511		2016	3	2	4	C	3	3	CM	611	12	12		3	355.511	235	1		3	382.886	250	1		3	355.511	235	1
20161830213		JHP_06_Jpa	33	382.886		2016	3	2	4	D	3	3	CM	611	12	12		3	382.886	235	1		3	363.176	250	1		3	382.886	235	1
20161830214		JHP_06_Jpa	34	363.176		2016	3	2	4	B	3	3	CM	611	12	12		3	363.176	235	1		3	362.081	250	1		3	363.176	235	1
20161830215		JHP_06_Jpa	35	362.081		2016	3	2	3	C	3	3	CM	611	12	12		3	362.081	235	1		3	350.036	250	1		3	362.081	235	1
20161830267		JHP_06_Jpa	36	350.036		2016	3	2	4	C	3	3	CM	612	12	12		3	350.036	235	1		2	301.856	250	1		3	350.036	235	1
20161830269		JHP_06_Jpa	38	301.856		2016	3	2	1	C	2	2	CM	612	12	12		2	301.856	235	1		2	308.426	250	1		2	301.856	235	1
20161830270		JHP_06_Jpa	39	308.426		2016	3	1	3	C	2	2	CM	612	12	12		2	308.426	235	1		3	355.511	250	1		2	308.426	235	1
20161830274		JHP_06_Jpa	40	355.511		2016	3	2	4	D	3	3	CM	612	12	12		3	355.511	235	1		2	321.566	250	1		3	355.511	235	1
20161830275		JHP_06_Jpa	41	321.566		2016	3	1	4	E	2	2	CM	612	12	12		2	321.566	235	1		2	289.811	250	1		2	321.566	235	1
20161830276		JHP_06_Jpa	42	289.811		2016	3	1	4	D	2	2	CM	612	12	12		2	289.811	235	1		2	328.136	250	1		2	289.811	235	1
20161830277		JHP_06_Jpa	43	328.136		2016	3	1	4	D	2	2	CM	612	12	12		2	328.136	235	1		2	294.191	250	1		2	328.136	235	1
20161830278		JHP_06_Jpa	44	294.191		2016	3	1	4	D	2	2	CM	612	12	12		2	294.191	235	1		2	307.331	250	1		2	294.191	235	1
20161830279		JHP_06_Jpa	45	307.331		2016	3	1	4	D	2	2	CM	612	12	12		2	307.331	235	1		2	312.806	250	1		2	307.331	235	1
20161830280		JHP_06_Jpa	46	312.806		2016	3	1	4	C	2	2	CM	612	12	12		2	312.806	235	1		2	320.471	250	1		2	312.806	235	1
20161830281		JHP_06_Jpa	47	320.471		2016	3	1	4	C	2	2	CM	612	12	12		2	320.471	235	1		2	332.516	250	1		2	320.471	235	1
20161830459		JHP_06_Jpa	48	332.516		2016	3	2	1	C	2	2	CM	612	12	11		2	332.516	235	1		2	322.661	250	1		2	332.516	235	1
20161830460		JHP_06_Jpa	49	322.661		2016	3	1	4	D	2	2	CM	612	12	11		2	322.661	235	1		2	306.236	250	1		2	322.661	235	1
20161830461		JHP_06_Jpa	50	306.236		2016	3	1	4	D	2	2	CM	612	12	11		2	306.236	235	1		2	292.001	250	1		2	306.236	235	1
20161830462		JHP_06_Jpa	51	292.001		2016	3	1	4	D	2	2	CM	612	12	11		2	292.001	235	1		2	320.471	250	1		2	292.001	235	1
20161830463		JHP_06_Jpa	52	320.471		2016	3	1	4	D	2	2	CM	612	12	11		2	320.471	235	1		2	305.141	250	1		2	320.471	235	1
20161830465		JHP_06_Jpa	53	305.141		2016	3	1	3	C	2	2	CM	612	12	11		2	305.141	235	1		2	310.616	250	1		2	305.141	235	1
20161830466		JHP_06_Jpa	54	310.616		2016	3	1	4	C	2	2	CM	612	12	11		2	310.616	235	1		4	382.886	250	1		2	310.616	235	1
20161830467		JHP_06_Jpa	55	382.886		2016	3	3	3	C	4	4	CM	612	12	11		4	382.886	235	1		2	322.661	250	1		4	382.886	235	1
20161830468		JHP_06_Jpa	56	322.661		2016	3	1	4	E	2	2	CM	612	12	11		2	322.661	235	1		2	304.046	250	1		2	322.661	235	1
20161830469		JHP_06_Jpa	57	304.046		2016	3	1	4	C	2	2	CM	612	12	11		2	304.046	235	1		2	335.801	250	1		2	304.046	235	1
20161830470		JHP_06_Jpa	58	335.801		2016	3	1	4	D	2	2	CM	612	12	11		2	335.801	235	1		2	336.896	250	1		2	335.801	235	1
20161830471		JHP_06_Jpa	59	336.896		2016	3	1	4	D	2	2	CM	612	12	11		2	336.896	235	1		2	288.716	250	1		2	336.896	235	1
20161830472		JHP_06_Jpa	60	288.716		2016	3	2	1	D	2	2	CM	612	12	11		2	288.716	235	1		2	299.666	250	1		2	288.716	235	1
20161830473		JHP_06_Jpa	61	299.666		2016	3	1	4	D	2	2	CM	612	12	11		2	299.666	235	1		2	292.001	250	1		2	299.666	235	1
20161830497		JHP_06_Jpa	62	292.001		2016	3	1	4	D	2	2	CM	989	12	11		2	292.001	235	1		3	375.221	250	1		2	292.001	235	1
20161830498		JHP_06_Jpa	63	375.221		2016	3	2	4	E	3	3	CM	989	12	11		3	375.221	235	1		3	364.271	250	1		3	375.221	235	1
20161830499		JHP_06_Jpa	64	364.271		2016	3	3	1	D	3	3	CM	989	12	11		3	364.271	235	1		3	366.461	250	1		3	364.271	235	1
20161830500		JHP_06_Jpa	65	366.461		2016	3	3	2	D	3	3	CM	989	12	11		3	366.461	235	1		3	366.461	250	1		3	366.461	235	1
20161830501		JHP_06_Jpa	66	366.461		2016	3	2	4	D	3	3	CM	989	12	11		3	366.461	235	1		3	360.986	250	1		3	366.461	235	1
20161830502		JHP_06_Jpa	67	360.986		2016	3	2	4	C	3	3	CM	989	12	11		3	360.986	235	1		2	341.276	250	1		3	360.986	235	1
20161830503		JHP_06_Jpa	68	341.276		2016	3	2	1	D	2	2	CM	989	12	11		2	341.276	235	1		3	353.321	250	1		2	341.276	235	1
20161830504		JHP_06_Jpa	69	353.321		2016	3	2	4	D	3	3	CM	989	12	11		3	353.321	235	1		3	345.656	250	1		3	353.321	235	1
20161830505		JHP_06_Jpa	70	345.656		2016	3	2	4	D	3	3	CM	989	12	11		3	345.656	235	1		3	364.271	250	1		3	345.656	235	1
20161830506		JHP_06_Jpa	71	364.271		2016	3	2	4	F	3	3	CM	989	12	11		3	364.271	235	1		3	358.796	250	1		3	364.271	235	1
20161830507		JHP_06_Jpa	72	358.796		2016	3	2	4	D	3	3	CM	989	12	11		3	358.796	235	1		4	330.326	250	1		3	358.796	235	1
20161830508		JHP_06_Jpa	73	330.326		2016	3	3	4	D	4	4	CM	989	12	11		4	330.326	235	1		3	380	250	1		4	330.326	235	1
40775	35	JHP_06_Jpa	74	380	F	2008	10	3	3	C	3	3.58333	3	610	12	11		3	380	235	1		5	329.231	250	1		3	380	235	1
43929	05	JHP_06_Jpa	75	329.231	F	2011	12	5	3	C	5	5.75	3	611	12	11		5	329.231	235	1		4	431	250	1		5	329.231	235	1
43937	01	JHP_06_Jpa	76	431	F	2011	12	4	4	D	4	4.75	3	611	12	11		4	431	235	1		3	367	250	1		4	431	235	1
48968	25	JHP_06_Jpa	77	367	F	2016	6	3	2	C	3	3.25	3	611	12	11		3	367	235	1		3	423	250	1		3	367	235	1
48970	20	JHP_06_Jpa	78	423	F	2016	6	2	4	C	3	3.25	3	611	12	11		3	423	235	1		3	315	250	1		3	423	235	1
48973	02	JHP_06_Jpa	79	315	F	2016	6	2	3	C	3	3.25	3	611	12	11		3	315	235	1		3	366	250	1		3	315	235	1
48981	01	JHP_06_Jpa	80	366	F	2016	6	3	2	D	3	3.25	3	611	12	11		3	366	235	1		2	345	250	1		3	366	235	1
48981	07	JHP_06_Jpa	81	345	U	2016	6	2	2	D	2	2.25	3	611	12	11		2	345	235	1		7	332	250	1		2	345	235	1
48983	05	JHP_06_Jpa	82	332	F	2016	7	2	2	C	7	7.33333	3	611	12	11		7	332	235	1		7	467	250	1		7	332	235	1
48983	09	JHP_06_Jpa	83	467	F	2016	7	7	2	C	7	7.33333	3	611	12	11		7	467	235	1		8	539	250	1		7	467	235	1
48983	10	JHP_06_Jpa	84	539	F	2016	7	8	3	D	8	8.33333	3	611	12	11		8	539	235	1		3	370	250	1		8	539	235	1
48983	11	JHP_06_Jpa	85	370	M	2016	7	3	3	C	3	3.33333	3	611	12	11		3	370	235	1		2	317	250	1		3	370	235	1
48986	03	JHP_06_Jpa	86	317	F	2016	7	2	2	C	2	2.33333	3	611	12	11		2	317	235	1		3	331	250	1		2	317	235	1
48986	06	JHP_06_Jpa	87	331	F	2016	7	3	2	C	3	3.33333	3	611	12	11		3	331	235	1		3	385	250	1		3	331	235	1
48994	17	JHP_06_Jpa	88	385	F	2016	7	3	2	D	3	3.33333	3	611	12	11		3	385	235	1		4	375	250	1		3	385	235	1
48994	18	JHP_06_Jpa	89	375	F	2016	7	4	2	C	4	4.33333	3	611	12	11		4	375	235	1		3	366	250	1		4	375	235	1
48994	19	JHP_06_Jpa	90	366	F	2016	7	3	3	C	3	3.33333	3	611	12	11		3	366	235	1		2	317	250	1		3	366	235	1
48999	01	JHP_07_Jpa	1	317	F	2016	7	2	2	C	2	2.33333	3	611	12	11		2	317	235	1		2	303	250	1		2	317	235	1
48999	12	JHP_07_Jpa	2	303	F	2016	7	2	2	C	2	2.33333	3	611	12	11		2	303	235	1		2	344	250	1		2	303	235	1
48999	16	JHP_07_Jpa	3	344	F	2016	7	2	3	C	2	2.33333	3	611	12	11		2	344	235	1		2	322	250	1		2	344	235	1
48999	17	JHP_07_Jpa	4	322	F	2016	7	2	2	D	2	2.33333	3	611	12	11		2	322	235	1		3	385	250	1		2	322	235	1
49365	10	JHP_07_Jpa	5	385	F	2016	4	3	2	D	3	3.08333	3	611	12	12		3	385	235	1		7	560	250	1		3	385	235	1
49368	18	JHP_07_Jpa	6	560	M	2016	4	7	2	E	7	7.08333	3	611	12	12		7	560	235	1		4	450	250	1		7	560	235	1
49368	20	JHP_07_Jpa	7	450	F	2016	4	3	4	D	4	4.08333	3	611	12	12		4	450	235	1		3	445	250	1		4	450	235	1
49368	23	JHP_07_Jpa	8	445	F	2016	4	2	4	D	3	3.08333	3	611	12	12		3	445	235	1		5	435	250	1		3	445	235	1
49368	24	JHP_07_Jpa	9	435	F	2016	4	4	4	D	5	5.08333	3	611	12	12		5	435	235	1		4	475	250	1		5	435	235	1
49368	25	JHP_07_Jpa	10	475	M	2016	4	4	2	D	4	4.08333	3	611	12	12		4	475	235	1		4	490	250	1		4	475	235	1
49368	26	JHP_07_Jpa	11	490	F	2016	4	4	2	D	4	4.08333	3	611	12	12		4	490	235	1		6	610	250	1		4	490	235	1
49368	27	JHP_07_Jpa	12	610	M	2016	4	6	2	E	6	6.08333	3	611	12	12		6	610	235	1		3	385	250	1		6	610	235	1
49370	14	JHP_07_Jpa	13	385	F	2016	4	2	3	C	3	3.08333	3	611	12	12		3	385	235	1		3	375	250	1		3	385	235	1
49373	19	JHP_07_Jpa	14	375	F	2016	4	2	4	E	3	3.08333	3	611	12	12		3	375	235	1		3	355	250	1		3	375	235	1
49385	30	JHP_07_Jpa	15	355	U	2016	4	3	1	C	3	3.08333	3	611	12	12		3	355	235	1		3	360	250	1		3	355	235	1
49395	28	JHP_07_Jpa	16	360	F	2016	5	2	4	C	3	3.16667	3	611	12	12		3	360	235	1		2	305	250	1		3	360	235	1
49395	29	JHP_07_Jpa	17	305	F	2016	5	2	1	C	2	2.16667	3	611	12	12		2	305	235	1		8	520	250	1		2	305	235	1
49395	31	JHP_07_Jpa	18	520	M	2016	5	8	1	D	8	8.16667	3	611	12	12		8	520	235	1		6	552	250	1		8	520	235	1
49395	23	JHP_07_Jpa	19	552	F	2016	5	5	4	D	6	6.16667	3	611	12	12		6	552	235	1		5	435	250	1		6	552	235	1
49395	24	JHP_07_Jpa	20	435	F	2016	5	4	4	D	5	5.16667	3	611	12	12		5	435	235	1		8	497	250	1		5	435	235	1
49395	25	JHP_07_Jpa	21	497	M	2016	5	7	4	E	8	8.16667	3	611	12	12		8	497	235	1		7	510	250	1		8	497	235	1
49395	26	JHP_07_Jpa	22	510	M	2016	5	6	4	D	7	7.16667	3	611	12	12		7	510	235	1		5	480	250	1		7	510	235	1
49395	27	JHP_07_Jpa	23	480	F	2016	5	5	2	C	5	5.16667	3	611	12	12		5	480	235	1		5	390	250	1		5	480	235	1
49395	59	JHP_07_Jpa	24	390	F	2016	5	4	3	D	5	5.16667	3	611	12	12		5	390	235	1		4	470	250	1		5	390	235	1
49395	60	JHP_07_Jpa	25	470	F	2016	5	3	4	C	4	4.16667	3	611	12	12		4	470	235	1		3	335	250	1		4	470	235	1
49700	57	JHP_07_Jpa	26	335	F	2016	5	3	1	C	3	3.16667	3	611	12	12		3	335	235	1		4	410	250	1		3	335	235	1
49708	01	JHP_07_Jpa	27	410	F	2016	5	4	2	C	4	4.16667	3	611	12	12		4	410	235	1		3	357	250	1		4	410	235	1
49712	04	JHP_07_Jpa	28	357	F	2016	5	2	4	C	3	3.16667	3	611	12	12		3	357	235	1		3	345	250	1		3	357	235	1
49712	16	JHP_07_Jpa	29	345	F	2016	5	3	2	C	3	3.16667	3	611	12	12		3	345	235	1		2	252	250	1		3	345	235	1
49715	19	JHP_07_Jpa	30	252	F	2016	5	1	4	D	2	2.16667	3	611	12	12		2	252	235	1		6	467	250	1		2	252	235	1
49716	02	JHP_07_Jpa	31	467	F	2016	5	6	1	D	6	6.16667	3	611	12	12		6	467	235	1		3	382	250	1		6	467	235	1
49717	01	JHP_07_Jpa	32	382	F	2016	5	2	4	C	3	3.16667	3	611	12	12		3	382	235	1		2	382	250	1		3	382	235	1
49720	01	JHP_07_Jpa	33	382	F	2016	5	1	4	C	2	2.16667	3	611	12	11		2	382	235	1		4	420	250	1		2	382	235	1
49720	05	JHP_07_Jpa	34	420	F	2016	5	4	1	C	4	4.16667	3	611	12	11		4	420	235	1		2	327	250	1		4	420	235	1
49722	14	JHP_07_Jpa	35	327	F	2016	5	2	2	C	2	2.16667	3	611	12	12		2	327	235	1		6	485	250	1		2	327	235	1
49731	04	JHP_07_Jpa	36	485	M	2016	6	6	2	D	6	6.25	3	611	12	12		6	485	235	1		3	355	250	1		6	485	235	1
49731	05	JHP_07_Jpa	37	355	F	2016	6	2	4	C	3	3.25	3	611	12	12		3	355	235	1		3	350	250	1		3	355	235	1
49731	07	JHP_07_Jpa	38	350	F	2016	6	2	4	C	3	3.25	3	611	12	12		3	350	235	1		4	375	250	1		3	350	235	1
49731	09	JHP_07_Jpa	39	375	F	2016	6	3	3	D	4	4.25	3	611	12	12		4	375	235	1		2	340	250	1		4	375	235	1
49731	10	JHP_07_Jpa	40	340	F	2016	6	2	2	C	2	2.25	3	611	12	12		2	340	235	1		2	346	250	1		2	340	235	1
49733	13	JHP_07_Jpa	41	346	F	2016	6	2	2	C	2	2.25	3	611	12	12		2	346	235	1		2	305	250	1		2	346	235	1
49733	14	JHP_07_Jpa	42	305	F	2016	6	1	4	C	2	2.25	3	611	12	12		2	305	235	1		2	292	250	1		2	305	235	1
49735	04	JHP_07_Jpa	43	292	F	2016	6	2	1	C	2	2.25	3	611	12	12		2	292	235	1		3	344	250	1		2	292	235	1
49735	05	JHP_07_Jpa	44	344	F	2016	6	3	2	D	3	3.25	3	611	12	12		3	344	235	1		2	295	250	1		3	344	235	1
49735	06	JHP_07_Jpa	45	295	F	2016	6	2	2	D	2	2.25	3	611	12	12		2	295	235	1		2	287	250	1		2	295	235	1
49712	13	JHP_07_Jpa	46	287	F	2016	5	2	1	C	2	2.16667	3	611	12	12		2	287	235	1		6	480	250	1		2	287	235	1
49749	02	JHP_07_Jpa	47	480	F	2016	6	6	2	C	6	6.25	3	611	12	12		6	480	235	1		9	475	250	1		6	480	235	1
49749	35	JHP_07_Jpa	48	475	M	2016	6	9	2	D	9	9.25	3	611	12	12		9	475	235	1		7	440	250	1		9	475	235	1
49749	41	JHP_07_Jpa	49	440	F	2016	6	7	2	D	7	7.25	3	611	12	12		7	440	235	1		2	328	250	1		7	440	235	1
49750	04	JHP_07_Jpa	50	328	F	2016	6	2	2	B	2	2.25	3	611	12	12		2	328	235	1		2	304	250	1		2	328	235	1
49750	05	JHP_07_Jpa	51	304	F	2016	6	1	4	C	2	2.25	3	611	12	12		2	304	235	1		2	304	250	1		2	304	235	1
49750	06	JHP_07_Jpa	52	304	F	2016	6	2	2	C	2	2.25	3	611	12	12		2	304	235	1		2	312	250	1		2	304	235	1
49750	07	JHP_07_Jpa	53	312	F	2016	6	2	1	C	2	2.25	3	611	12	12		2	312	235	1		2	325	250	1		2	312	235	1
49750	08	JHP_07_Jpa	54	325	F	2016	6	1	4	C	2	2.25	3	611	12	12		2	325	235	1		2	325	250	1		2	325	235	1
49754	03	JHP_07_Jpa	55	325	F	2016	6	1	4	B	2	2.25	3	611	12	11		2	325	235	1		2	342	250	1		2	325	235	1
49768	05	JHP_07_Jpa	56	342	F	2016	7	2	2	C	2	2.33333	3	611	12	12		2	342	235	1		2	348	250	1		2	342	235	1
49800	04	JHP_07_Jpa	57	348	F	2016	7	2	2	C	2	2.33333	3	611	12	11		2	348	235	1		2	313	250	1		2	348	235	1
49802	49	JHP_07_Jpa	58	313	F	2016	7	2	2	D	2	2.33333	3	611	12	11		2	313	235	1		2	311	250	1		2	313	235	1
49803	03	JHP_07_Jpa	59	311	F	2016	8	2	2	D	2	2.41667	3	611	12	11		2	311	235	1		2	347	250	1		2	311	235	1
49803	04	JHP_07_Jpa	60	347	F	2016	8	2	2	C	2	2.41667	3	611	12	11		2	347	235	1		4	280	250	1		2	347	235	1
49806	20	JHP_07_Jpa	61	280	M	2016	8	4	3	D	4	4.41667	3	611	12	11		4	280	235	1		3	348	250	1		4	280	235	1
49807	13	JHP_07_Jpa	62	348	F	2016	8	3	2	D	3	3.41667	3	611	12	11		3	348	235	1		2	355	250	1		3	348	235	1
49807	20	JHP_07_Jpa	63	355	F	2016	8	2	4	D	2	2.41667	3	611	12	11		2	355	235	1		2	317	250	1		2	355	235	1
49809	05	JHP_07_Jpa	64	317	F	2016	8	2	2	D	2	2.41667	3	611	12	11		2	317	235	1		4	375	250	1		2	317	235	1
49810	10	JHP_07_Jpa	65	375	F	2016	8	4	2	D	4	4.41667	3	611	12	11		4	375	235	1		2	316	250	1		4	375	235	1
49814	02	JHP_07_Jpa	66	316	F	2016	8	2	2	B	2	2.41667	3	611	12	11		2	316	235	1		2	314	250	1		2	316	235	1
49814	05	JHP_07_Jpa	67	314	F	2016	8	2	3	C	2	2.41667	3	611	12	11		2	314	235	1		2	306	250	1		2	314	235	1
49814	16	JHP_07_Jpa	68	306	F	2016	8	2	2	C	2	2.41667	3	611	12	11		2	306	235	1		2	311	250	1		2	306	235	1
49817	17	JHP_07_Jpa	69	311	F	2016	8	2	2	C	2	2.41667	3	611	12	11		2	311	235	1		3	316	250	1		2	311	235	1
49817	31	JHP_07_Jpa	70	316	F	2016	8	3	2	C	3	3.41667	3	611	12	11		3	316	235	1		1	332	250	1		3	316	235	1
49821	06	JHP_07_Jpa	71	332	F	2016	8	1	4	C	1	1.41667	3	611	12	11		1	332	235	1		2	309.521	250	1		1	332	235	1
49821	07	JHP_07_Jpa	72	309.521	F	2016	8	2	2	C	2	2.41667	3	611	12	11		2	309.521	235	1		2	341	250	1		2	309.521	235	1
49821	17	JHP_07_Jpa	73	341	F	2016	8	2	3	D	2	2.41667	3	611	12	11		2	341	235	1		2	371	250	1		2	341	235	1
49821	18	JHP_07_Jpa	74	371	F	2016	8	2	3	C	2	2.41667	3	611	12	11		2	371	235	1		2	327	250	1		2	371	235	1
49822	10	JHP_07_Jpa	75	327	F	2016	8	2	2	D	2	2.41667	3	611	12	11		2	327	235	1		3	385	250	1		2	327	235	1
49822	12	JHP_07_Jpa	76	385	F	2016	8	3	2	D	3	3.41667	3	611	12	11		3	385	235	1		2	349	250	1		3	385	235	1
49826	05	JHP_07_Jpa	77	349	F	2016	9	2	2	D	2	2.5	3	611	12	11		2	349	235	1		2	326	250	1		2	349	235	1
49828	24	JHP_07_Jpa	78	326	F	2016	9	2	2	D	2	2.5	3	611	12	11		2	326	235	1		6	485	250	1		2	326	235	1
FL1532120080427002	TQ0803436	JHP_07_Jpa	79	485	M	2008	4	5	4	D	6	6.08333	1	610	FL	11		6	485	235	1		7	522	250	1		6	485	235	1
FL1532120080427002	TQ0803437	JHP_07_Jpa	80	522	M	2008	4	6	3	E	7	7.08333	1	610	FL	11		7	522	235	1		5	435	250	1		7	522	235	1
FL1532120080427002	TQ0803438	JHP_07_Jpa	81	435	M	2008	4	4	4	C	5	5.08333	1	610	FL	11		5	435	235	1		3	362	250	1		5	435	235	1
FL1532120080427002	TQ0803439	JHP_07_Jpa	82	362	F	2008	4	2	3	D	3	3.08333	1	610	FL	11		3	362	235	1		6	490	250	1		3	362	235	1
FL1532120080427006	TQ0803509	JHP_07_Jpa	83	490	M	2008	4	6	2	D	6	6.08333	1	610	FL	11		6	490	235	1		5	455.156	250	1		6	490	235	1
345190	20161830997	JHP_07_JPA	84	455.156	D	2016	5	5	2	D	5	5.16667	1	610	FL	11		5	455.156	235	1		3	364.271	250	1		5	455.156	235	1
345190	20161830998	JHP_07_JPA	85	364.271	D	2016	5	2	4	D	3	3.16667	1	610	FL	11		3	364.271	235	1		4	467.201	250	1		3	364.271	235	1
345190	20161830999	JHP_07_JPA	86	467.201	D	2016	5	4	2	D	4	4.16667	1	610	FL	11		4	467.201	235	1		2	373.031	250	1		4	467.201	235	1
345190	20161831000	JHP_07_JPA	87	373.031	D	2016	5	2	2	C	2	2.16667	1	610	FL	11		2	373.031	235	1		2	359.891	250	1		2	373.031	235	1
345190	20161831001	JHP_07_JPA	88	359.891	D	2016	5	2	1	C	2	2.16667	1	610	FL	11		2	359.891	235	1		2	365.366	250	1		2	359.891	235	1
345190	20161831002	JHP_07_JPA	89	365.366	D	2016	5	2	1	C	2	2.16667	1	610	FL	11		2	365.366	235	1		4	423.401	250	1		2	365.366	235	1
345235	20161831003	JHP_07_JPA	90	423.401	D	2016	5	4	2	E	4	4.16667	1	760	FL	12		4	423.401	235	1		2	308.426	250	1		4	423.401	235	1
345171	20161830869	JHP_08_JPA	1	308.426	D	2016	5	2	2	B	2	2.16667	1	611	FL	12		2	308.426	235	1		3	325.946	250	1		2	308.426	235	1
345171	20161830870	JHP_08_JPA	2	325.946	D	2016	5	3	2	C	3	3.16667	1	611	FL	12		3	325.946	235	1		2	308.426	250	1		3	325.946	235	1
345171	20161830871	JHP_08_JPA	3	308.426	D	2016	5	2	2	D	2	2.16667	1	611	FL	12		2	308.426	235	1		2	294.191	250	1		2	308.426	235	1
345171	20161830872	JHP_08_JPA	4	294.191	D	2016	5	2	1	D	2	2.16667	1	611	FL	12		2	294.191	235	1		2	364.271	250	1		2	294.191	235	1
345171	20161830873	JHP_08_JPA	5	364.271	D	2016	5	2	2	C	2	2.16667	1	611	FL	12		2	364.271	235	1		3	383.981	250	1		2	364.271	235	1
345171	20161830874	JHP_08_JPA	6	383.981	D	2016	5	2	3	C	3	3.16667	1	611	FL	12		3	383.981	235	1		2	310.616	250	1		3	383.981	235	1
345171	20161830875	JHP_08_JPA	7	310.616	D	2016	5	2	2	B	2	2.16667	1	611	FL	12		2	310.616	235	1		3	300.761	250	1		2	310.616	235	1
345171	20161830876	JHP_08_JPA	8	300.761	D	2016	5	3	2	C	3	3.16667	1	611	FL	12		3	300.761	235	1							3	300.761	235	1

## Sheet: Area comp TL@age
INTERVIEW_ID	TAG_NUMBER	SLIDE_BOX_NO	SLIDE	SEX	Year	MONTH	MLB_ring	MLB_edge	MLB_qual	Cal_age	Frac_age	TL_mm	FISHING_MODE_ID	GEAR_CODE	LANDING_AREA_STATE_CODE	AREA_ID
47355	05	JHP_01_Jpa	1	F	2015	2	1	3	b	2	1.91667	289	3	611	12	11
47357	21	JHP_01_Jpa	2	F	2015	2	2	4	b	2	1.91667	290	3	611	12	11
47363	07	JHP_01_Jpa	3	F	2015	2	1	4	c	2	1.91667	309	3	611	12	11
47363	09	JHP_01_Jpa	4	F	2015	2	1	4	c	2	1.91667	260	3	611	12	11
47373	11	JHP_01_Jpa	5	M	2015	3	2	4	d	3	3	310	3	611	12	11
47378	17	JHP_01_Jpa	6	F	2015	3	4	1	d	4	4	392	3	611	12	11
47379	06	JHP_01_Jpa	7	F	2015	3	2	2	d	2	2	309	3	611	12	11
47381	13	JHP_01_Jpa	8	F	2015	3	3	3	d	4	4	353	3	611	12	11
47386	06	JHP_01_Jpa	9	F	2015	3	7	2	d	6	6	456	3	611	12	11
47395	12	JHP_01_Jpa	10	F	2015	4	4	1	d	4	4.08333	399	3	611	12	11
47551	03	JHP_01_Jpa	28	F	2015	1	4	4	c	4	3.83333	360	3	611	12	11
47552	02	JHP_01_Jpa	29	F	2015	1	3	3	d	4	3.83333	425	3	611	12	11
47552	03	JHP_01_Jpa	30	M	2015	1	5	2	d	5	4.83333	600	3	611	12	11
47558	07	JHP_01_Jpa	31	F	2015	1	3	2	c	4	3.83333	465	3	611	12	11
47705	01	JHP_02_Jpa	16	F	2015	3	3	4	C	4	4	410	3	611	12	11
47705	02	JHP_02_Jpa	17	M	2015	3	3	4	D	4	4	420	3	611	12	11
47705	03	JHP_02_Jpa	18	F	2015	3	2	4	C	2	2	310	3	611	12	11
47705	05	JHP_02_Jpa	19	F	2015	3	3	3	C	3	3	402	3	611	12	11
47804	07	JHP_02_Jpa	89	M	2015	4	4	2	D	4	4.08333	455	3	611	12	11
47808	05	JHP_02_Jpa	90	F	2015	4	1	4	C	2	2.08333	331	3	611	12	11
47819	12	JHP_03_Jpa	1	M	2015	5	3	1	D	3	3.16667	370	3	611	12	11
47845	14	JHP_03_Jpa	2	F	2015	6	2	2	C	2	2.25	325	3	611	12	11
47848	18	JHP_03_Jpa	3	F	2015	6	2	2	C	2	2.25	323	3	611	12	11
47856	20	JHP_03_Jpa	4	F	2015	7	2	2	D	2	2.33333	324	3	611	12	11
47856	21	JHP_03_Jpa	5	F	2015	7	4	2	D	4	4.33333	472	3	611	12	11
47862	06	JHP_03_Jpa	6	F	2015	7	2	2	D	2	2.33333	316	3	611	12	11
47863	13	JHP_03_Jpa	7	F	2015	7	2	2	D	2	2.33333	342	3	611	12	11
47864	11	JHP_03_Jpa	8	F	2015	7	2	2	D	2	2.33333	327	3	611	12	11
47868	12	JHP_03_Jpa	9	F	2015	7	2	3	D	2	2.33333	405	3	611	12	11
47872	05	JHP_03_Jpa	10	F	2015	8	2	2	C	2	2.41667	356	3	611	12	11
47874	30	JHP_03_Jpa	11	F	2015	8	3	2	E	3	3.41667	339	3	611	12	11
47876	18	JHP_03_Jpa	12	F	2015	8	2	2	D	2	2.41667	333.611	3	611	12	11
47877	17	JHP_03_Jpa	13	F	2015	8	2	2	D	2	2.41667	332	3	611	12	11
47880	15	JHP_03_Jpa	14	U	2015	8	3	3	D	4	4.41667	422	3	611	12	11
47886	06	JHP_03_Jpa	15	F	2015	8	3	3	C	3	3.41667	444	3	611	12	11
47890	17	JHP_03_Jpa	16	F	2015	9	5	2	D	5	5.5	485	3	611	12	11
47895	07	JHP_03_Jpa	17	F	2015	9	2	2	D	2	2.5	291	3	611	12	11
47898	09	JHP_03_Jpa	18	F	2015	9	2	3	D	2	2.5	338	3	611	12	11
48028	01	JHP_03_Jpa	21	F	2015	6	3	2	D	4	4.25	455	3	611	12	11
48028	04	JHP_03_Jpa	22	F	2015	6	3	1	D	3	3.25	365	3	611	12	11
48028	07	JHP_03_Jpa	23	F	2015	6	3	2	D	4	4.25	415	3	611	12	11
48076	07	JHP_03_Jpa	35	F	2015	8	3	2	D	3	3.41667	405	3	611	12	11
48077	05	JHP_03_Jpa	36	F	2015	8	4	4	D	4	4.41667	472	3	611	12	11
48079	50	JHP_03_Jpa	37	F	2015	8	2	2	D	2	2.41667	330	3	611	12	11
48421	02	JHP_03_Jpa	53	F	2015	9	3	2	D	3	3.5	445	3	611	12	11
48496	06	JHP_04_Jpa	8	F	2015	11	2	3	C	2	2.66667	345	3	611	12	11
48505	01	JHP_04_Jpa	11	F	2015	9	2	3	C	2	2.5	332	3	611	12	11
48505	02	JHP_04_Jpa	12	F	2015	9	2	2	D	2	2.5	354	3	611	12	11
48511	13	JHP_04_Jpa	13	F	2015	10	2	3	D	2	2.58333	352	3	611	12	11
48516	16	JHP_04_Jpa	14	F	2015	10	2	3	D	2	2.58333	339	3	611	12	11
48534	07	JHP_04_Jpa	15	F	2015	11	2	3	D	2	2.66667	322	3	611	12	11
48544	03	JHP_04_Jpa	16	F	2015	12	2	4	D	2	2.75	323	3	611	12	11
48545	17	JHP_04_Jpa	17	F	2015	12	2	3	D	2	2.75	329	3	611	12	11
48546	08	JHP_04_Jpa	18	F	2015	12	2	3	C	2	2.75	367	3	611	12	11
48549	17	JHP_04_Jpa	19	F	2015	12	2	2	D	2	2.75	347	3	611	12	11
48551	15	JHP_04_Jpa	20	F	2015	12	3	3	D	3	3.75	413	3	611	12	11
48558	03	JHP_04_Jpa	21	F	2015	12	2	3	C	2	2.75	283	3	611	12	11
48558	04	JHP_04_Jpa	22	F	2015	12	1	4	C	1	1.75	349	3	611	12	11
48564	27	JHP_04_Jpa	37	U	2016	1	1	4	D	2	1.83333	289	3	611	12	11
48576	14	JHP_04_Jpa	38	F	2016	1	2	3	C	2	1.83333	337	3	611	12	11
48584	03	JHP_04_Jpa	39	F	2016	2	1	4	D	2	1.91667	278	3	611	12	11
48592	06	JHP_04_Jpa	40	F	2016	2	2	3	D	3	2.91667	359	3	611	12	11
48592	21	JHP_04_Jpa	41	F	2016	2	2	4	D	3	2.91667	351	3	611	12	11
48593	12	JHP_04_Jpa	42	F	2016	2	2	4	E	3	2.91667	370	3	611	12	11
48593	13	JHP_04_Jpa	43	M	2016	2	5	4	E	6	5.91667	490	3	611	12	11
48901	09	JHP_04_Jpa	90	F	2016	3	1	4	D	2	2	293	3	611	12	11
48903	08	JHP_05_Jpa	1	M	2016	3	2	4	d	3	3	284	3	611	12	11
48904	01	JHP_05_Jpa	2	F	2016	3	1	4	C	2	2	256	3	611	12	11
48905	04	JHP_05_Jpa	3	F	2016	3	2	4	D	3	3	316	3	611	12	11
48909	01	JHP_05_Jpa	4	F	2016	3	2	4	D	3	3	325	3	611	12	11
48909	02	JHP_05_Jpa	5	F	2016	3	1	4	B	2	2	301	3	611	12	11
48915	21	JHP_05_Jpa	6	F	2016	3	3	4	D	4	4	352	3	611	12	11
48920	01	JHP_05_Jpa	7	F	2016	3	3	1	D	3	3	316	3	611	12	11
48920	02	JHP_05_Jpa	8	F	2016	3	1	4	C	2	2	313	3	611	12	11
48920	05	JHP_05_Jpa	9	F	2016	3	1	4	C	2	2	299	3	611	12	11
48922	11	JHP_05_Jpa	10	F	2016	3	3	1	C	3	3	365	3	611	12	11
48926	01	JHP_05_Jpa	11	F	2016	4	2	4	C	3	3.08333	380	3	611	12	11
48930	16	JHP_05_Jpa	12	F	2016	4	2	4	B	3	3.08333	357	3	611	12	11
48940	07	JHP_05_Jpa	13	F	2016	4	1	4	B	2	2.08333	305	3	611	12	11
	20151830481	JHP_05_Jpa	21		2015	4	3	2	C	3	3.08333	469.391	CM SPEARS		FL	11
48568	15	JHP_05_Jpa	29	F	2016	1	2	3	B	3	2.83333	345	3	611	12	11
48572	19	JHP_05_Jpa	30	M	2016	1	2	3	C	4	3.83333	320	3	611	12	11
48577	10	JHP_05_Jpa	31	F	2016	1	1	4	D	2	1.83333	286	3	611	12	11
48581	08	JHP_05_Jpa	32	F	2016	2	2	3	C	3	2.91667	391	3	611	12	11
48583	18	JHP_05_Jpa	33	F	2016	2	4	4	D	5	4.91667	449	3	611	12	11
48586	19	JHP_05_Jpa	34	F	2016	2	1	4	E	2	1.91667	304	3	611	12	11
48587	05	JHP_05_Jpa	35	F	2016	2	3	4	C	4	3.91667	445	3	611	12	11
48590	07	JHP_05_Jpa	36	F	2016	2	1	3	C	2	1.91667	316	3	611	12	11
48595	02	JHP_05_Jpa	37	F	2016	2	1	4	D	2	1.91667	280	3	611	12	11
48598	08	JHP_05_Jpa	38	F	2016	2	2	4	C	3	2.91667	356	3	611	12	11
48598	09	JHP_05_Jpa	39	F	2016	2	1	4	C	2	1.91667	321	3	611	12	11
48941	19	JHP_05_Jpa	54	F	2016	5	1	4	D	2	2.16667	304	3	611	12	11
48944	11	JHP_05_Jpa	55	F	2016	5	1	4	D	2	2.16667	313	3	611	12	11
48948	10	JHP_05_Jpa	56	F	2016	5	2	1	D	2	2.16667	310	3	611	12	11
48949	12	JHP_05_Jpa	57	F	2016	5	2	1	D	3	3.16667	377	3	611	12	11
48949	19	JHP_05_Jpa	58	F	2016	5	3	2	E	4	4.16667	395	3	611	12	11
48951	06	JHP_05_Jpa	59	F	2016	5	1	4	C	2	2.16667	304	3	611	12	11
48951	13	JHP_05_Jpa	60	M	2016	5	4	2	D	5	5.16667	393	3	611	12	11
48951	34	JHP_05_Jpa	61	F	2016	5	2	2	C	2	2.16667	290	3	611	12	11
48952	09	JHP_05_Jpa	62	F	2016	5	2	1	C	2	2.16667	327	3	611	12	11
48953	05	JHP_05_Jpa	63	F	2016	5	1	4	D	2	2.16667	340	3	611	12	11
48953	08	JHP_05_Jpa	64	F	2016	5	2	1	C	2	2.16667	317	3	611	12	11
48954	07	JHP_05_Jpa	65	F	2016	5	3	2	C	4	4.16667	445	3	611	12	11
48954	28	JHP_05_Jpa	66	F	2016	5	1	4	C	2	2.16667	301	3	611	12	11
48957	06	JHP_05_Jpa	67	F	2016	5	2	2	B	2	2.16667	351	3	611	12	11
48961	01	JHP_05_Jpa	68	M	2016	5	6	2	D	7	7.16667	461	3	611	12	11
49320	12	JHP_05_Jpa	80	F	2016	3	4	1	C	4	4	447	3	611	12	11
20161830459		JHP_06_Jpa	48		2016	3	2	1	C	2	2	332.516	CM	612	12	11
20161830460		JHP_06_Jpa	49		2016	3	1	4	D	2	2	322.661	CM	612	12	11
20161830461		JHP_06_Jpa	50		2016	3	1	4	D	2	2	306.236	CM	612	12	11
20161830462		JHP_06_Jpa	51		2016	3	1	4	D	2	2	292.001	CM	612	12	11
20161830463		JHP_06_Jpa	52		2016	3	1	4	D	2	2	320.471	CM	612	12	11
20161830465		JHP_06_Jpa	53		2016	3	1	3	C	2	2	305.141	CM	612	12	11
20161830466		JHP_06_Jpa	54		2016	3	1	4	C	2	2	310.616	CM	612	12	11
20161830467		JHP_06_Jpa	55		2016	3	3	3	C	4	4	382.886	CM	612	12	11
20161830468		JHP_06_Jpa	56		2016	3	1	4	E	2	2	322.661	CM	612	12	11
20161830469		JHP_06_Jpa	57		2016	3	1	4	C	2	2	304.046	CM	612	12	11
20161830470		JHP_06_Jpa	58		2016	3	1	4	D	2	2	335.801	CM	612	12	11
20161830471		JHP_06_Jpa	59		2016	3	1	4	D	2	2	336.896	CM	612	12	11
20161830472		JHP_06_Jpa	60		2016	3	2	1	D	2	2	288.716	CM	612	12	11
20161830473		JHP_06_Jpa	61		2016	3	1	4	D	2	2	299.666	CM	612	12	11
20161830497		JHP_06_Jpa	62		2016	3	1	4	D	2	2	292.001	CM	989	12	11
20161830498		JHP_06_Jpa	63		2016	3	2	4	E	3	3	375.221	CM	989	12	11
20161830499		JHP_06_Jpa	64		2016	3	3	1	D	3	3	364.271	CM	989	12	11
20161830500		JHP_06_Jpa	65		2016	3	3	2	D	3	3	366.461	CM	989	12	11
20161830501		JHP_06_Jpa	66		2016	3	2	4	D	3	3	366.461	CM	989	12	11
20161830502		JHP_06_Jpa	67		2016	3	2	4	C	3	3	360.986	CM	989	12	11
20161830503		JHP_06_Jpa	68		2016	3	2	1	D	2	2	341.276	CM	989	12	11
20161830504		JHP_06_Jpa	69		2016	3	2	4	D	3	3	353.321	CM	989	12	11
20161830505		JHP_06_Jpa	70		2016	3	2	4	D	3	3	345.656	CM	989	12	11
20161830506		JHP_06_Jpa	71		2016	3	2	4	F	3	3	364.271	CM	989	12	11
20161830507		JHP_06_Jpa	72		2016	3	2	4	D	3	3	358.796	CM	989	12	11
20161830508		JHP_06_Jpa	73		2016	3	3	4	D	4	4	330.326	CM	989	12	11
40775	35	JHP_06_Jpa	74	F	2008	10	3	3	C	3	3.58333	380	3	610	12	11
43929	05	JHP_06_Jpa	75	F	2011	12	5	3	C	5	5.75	329.231	3	611	12	11
43937	01	JHP_06_Jpa	76	F	2011	12	4	4	D	4	4.75	431	3	611	12	11
48968	25	JHP_06_Jpa	77	F	2016	6	3	2	C	3	3.25	367	3	611	12	11
48970	20	JHP_06_Jpa	78	F	2016	6	2	4	C	3	3.25	423	3	611	12	11
48973	02	JHP_06_Jpa	79	F	2016	6	2	3	C	3	3.25	315	3	611	12	11
48981	01	JHP_06_Jpa	80	F	2016	6	3	2	D	3	3.25	366	3	611	12	11
48981	07	JHP_06_Jpa	81	U	2016	6	2	2	D	2	2.25	345	3	611	12	11
48983	05	JHP_06_Jpa	82	F	2016	7	2	2	C	7	7.33333	332	3	611	12	11
48983	09	JHP_06_Jpa	83	F	2016	7	7	2	C	7	7.33333	467	3	611	12	11
48983	10	JHP_06_Jpa	84	F	2016	7	8	3	D	8	8.33333	539	3	611	12	11
48983	11	JHP_06_Jpa	85	M	2016	7	3	3	C	3	3.33333	370	3	611	12	11
48986	03	JHP_06_Jpa	86	F	2016	7	2	2	C	2	2.33333	317	3	611	12	11
48986	06	JHP_06_Jpa	87	F	2016	7	3	2	C	3	3.33333	331	3	611	12	11
48994	17	JHP_06_Jpa	88	F	2016	7	3	2	D	3	3.33333	385	3	611	12	11
48994	18	JHP_06_Jpa	89	F	2016	7	4	2	C	4	4.33333	375	3	611	12	11
48994	19	JHP_06_Jpa	90	F	2016	7	3	3	C	3	3.33333	366	3	611	12	11
48999	01	JHP_07_Jpa	1	F	2016	7	2	2	C	2	2.33333	317	3	611	12	11
48999	12	JHP_07_Jpa	2	F	2016	7	2	2	C	2	2.33333	303	3	611	12	11
48999	16	JHP_07_Jpa	3	F	2016	7	2	3	C	2	2.33333	344	3	611	12	11
48999	17	JHP_07_Jpa	4	F	2016	7	2	2	D	2	2.33333	322	3	611	12	11
49720	01	JHP_07_Jpa	33	F	2016	5	1	4	C	2	2.16667	382	3	611	12	11
49720	05	JHP_07_Jpa	34	F	2016	5	4	1	C	4	4.16667	420	3	611	12	11
49754	03	JHP_07_Jpa	55	F	2016	6	1	4	B	2	2.25	325	3	611	12	11
49800	04	JHP_07_Jpa	57	F	2016	7	2	2	C	2	2.33333	348	3	611	12	11
49802	49	JHP_07_Jpa	58	F	2016	7	2	2	D	2	2.33333	313	3	611	12	11
49803	03	JHP_07_Jpa	59	F	2016	8	2	2	D	2	2.41667	311	3	611	12	11
49803	04	JHP_07_Jpa	60	F	2016	8	2	2	C	2	2.41667	347	3	611	12	11
49806	20	JHP_07_Jpa	61	M	2016	8	4	3	D	4	4.41667	280	3	611	12	11
49807	13	JHP_07_Jpa	62	F	2016	8	3	2	D	3	3.41667	348	3	611	12	11
49807	20	JHP_07_Jpa	63	F	2016	8	2	4	D	2	2.41667	355	3	611	12	11
49809	05	JHP_07_Jpa	64	F	2016	8	2	2	D	2	2.41667	317	3	611	12	11
49810	10	JHP_07_Jpa	65	F	2016	8	4	2	D	4	4.41667	375	3	611	12	11
49814	02	JHP_07_Jpa	66	F	2016	8	2	2	B	2	2.41667	316	3	611	12	11
49814	05	JHP_07_Jpa	67	F	2016	8	2	3	C	2	2.41667	314	3	611	12	11
49814	16	JHP_07_Jpa	68	F	2016	8	2	2	C	2	2.41667	306	3	611	12	11
49817	17	JHP_07_Jpa	69	F	2016	8	2	2	C	2	2.41667	311	3	611	12	11
49817	31	JHP_07_Jpa	70	F	2016	8	3	2	C	3	3.41667	316	3	611	12	11
49821	06	JHP_07_Jpa	71	F	2016	8	1	4	C	1	1.41667	332	3	611	12	11
49821	07	JHP_07_Jpa	72	F	2016	8	2	2	C	2	2.41667	309.521	3	611	12	11
49821	17	JHP_07_Jpa	73	F	2016	8	2	3	D	2	2.41667	341	3	611	12	11
49821	18	JHP_07_Jpa	74	F	2016	8	2	3	C	2	2.41667	371	3	611	12	11
49822	10	JHP_07_Jpa	75	F	2016	8	2	2	D	2	2.41667	327	3	611	12	11
49822	12	JHP_07_Jpa	76	F	2016	8	3	2	D	3	3.41667	385	3	611	12	11
49826	05	JHP_07_Jpa	77	F	2016	9	2	2	D	2	2.5	349	3	611	12	11
49828	24	JHP_07_Jpa	78	F	2016	9	2	2	D	2	2.5	326	3	611	12	11
FL1532120080427002	TQ0803436	JHP_07_Jpa	79	M	2008	4	5	4	D	6	6.08333	485	1	610	FL	11
FL1532120080427002	TQ0803437	JHP_07_Jpa	80	M	2008	4	6	3	E	7	7.08333	522	1	610	FL	11
FL1532120080427002	TQ0803438	JHP_07_Jpa	81	M	2008	4	4	4	C	5	5.08333	435	1	610	FL	11
FL1532120080427002	TQ0803439	JHP_07_Jpa	82	F	2008	4	2	3	D	3	3.08333	362	1	610	FL	11
FL1532120080427006	TQ0803509	JHP_07_Jpa	83	M	2008	4	6	2	D	6	6.08333	490	1	610	FL	11
345190	20161830997	JHP_07_JPA	84	D	2016	5	5	2	D	5	5.16667	455.156	1	610	FL	11
345190	20161830998	JHP_07_JPA	85	D	2016	5	2	4	D	3	3.16667	364.271	1	610	FL	11
345190	20161830999	JHP_07_JPA	86	D	2016	5	4	2	D	4	4.16667	467.201	1	610	FL	11
345190	20161831000	JHP_07_JPA	87	D	2016	5	2	2	C	2	2.16667	373.031	1	610	FL	11
345190	20161831001	JHP_07_JPA	88	D	2016	5	2	1	C	2	2.16667	359.891	1	610	FL	11
345190	20161831002	JHP_07_JPA	89	D	2016	5	2	1	C	2	2.16667	365.366	1	610	FL	11
47411	03	JHP_01_Jpa	11	F	2015	2	4	4	d	4	3.91667	423	3	611	12	12
47413	07	JHP_01_Jpa	12	F	2015	3	3	4	b	2	2	284	3	611	12	12
47414	06	JHP_01_Jpa	13	F	2015	3	3	2	c	3	3	372	3	611	12	12
47414	16	JHP_01_Jpa	14	U	2015	3	3	4	d	4	4	409	3	611	12	12
47414	17	JHP_01_Jpa	15	U	2015	3	1	3	c	2	2	332	3	611	12	12
47414	18	JHP_01_Jpa	16	U	2015	3	2	2	c	2	2	306	3	611	12	12
47415	18	JHP_01_Jpa	17	F	2015	3	3	2	c	3	3	285	3	611	12	12
47415	19	JHP_01_Jpa	18	M	2015	3	3	4	d	4	4	396	3	611	12	12
47420	07	JHP_01_Jpa	19	U	2015	4	5	1	d	5	5.08333	480	3	611	12	12
47422	09	JHP_01_Jpa	20	U	2015	4	3	3	c	3	3.08333	349	3	611	12	12
47422	10	JHP_01_Jpa	21	U	2015	4	1	4	b	2	2.08333	310	3	611	12	12
47422	11	JHP_01_Jpa	22	U	2015	4	3	3	b	3	3.08333	362	3	611	12	12
47422	12	JHP_01_Jpa	23	U	2015	4	1	4	c	2	2.08333	299	3	611	12	12
47422	13	JHP_01_Jpa	24	F	2015	4	3			3	3.08333	318	3	611	12	12
47422	14	JHP_01_Jpa	25	U	2015	4	2	4	d	3	3.08333	363	3	611	12	12
47423	09	JHP_01_Jpa	26	M	2015	5	3	2	d	5	5.16667	420	3	611	12	12
47429	06	JHP_01_Jpa	27	F	2015	6	1	3	b	2	2.25	295	3	611	12	12
47560	01	JHP_01_Jpa	32	F	2015	1	1	4	c	2	1.83333	302	3	611	12	12
47560	91	JHP_01_Jpa	33	F	2015	1	1	4	c	2	1.83333	295	3	611	12	12
47562	06	JHP_01_Jpa	34	F	2015	1				6	5.83333	440	3	611	12	12
47562	12	JHP_01_Jpa	35	F	2015	1	4	4	d	5	4.83333	407	3	611	12	12
47562	14	JHP_01_Jpa	36	F	2015	1	3	2	d	4	3.83333	385	3	611	12	12
47562	17	JHP_01_Jpa	37	F	2015	1	6	2	d	6	5.83333	470	3	611	12	12
47562	23	JHP_01_Jpa	38	M	2015	1	4	3	c	5	4.83333	445	3	611	12	12
47562	77	JHP_01_Jpa	39	F	2015	1	3	2	c	3	2.83333	387	3	611	12	12
47563	01	JHP_01_Jpa	40	F	2015	1	4	4	d	5	4.83333	380	3	611	12	12
47563	09	JHP_01_Jpa	41	F	2015	1	3	3	d	4	3.83333	340	3	611	12	12
47563	18	JHP_01_Jpa	42	F	2015	1	3	3	d	4	3.83333	357	3	611	12	12
47563	48	JHP_01_Jpa	43	F	2015	1	2	4	c	3	2.83333	300	3	611	12	12
47564	26	JHP_01_Jpa	44	F	2015	1	4	3	d	5	4.83333	382	3	611	12	12
47567	13	JHP_01_Jpa	45	F	2015	1	3	3	d	5	4.83333	395	3	611	12	12
47567	15	JHP_01_Jpa	46	M	2015	1	3	3	c	4	3.83333	445	3	611	12	12
47569	13	JHP_01_Jpa	47	M	2015	1	6	3	c	7	6.83333	625	3	611	12	12
47577	07	JHP_01_Jpa	48	F	2015	1	4	2	d	5	4.83333	422	3	611	12	12
47579	28	JHP_01_Jpa	49	M	2015	2	4	3	d	5	4.91667	460	3	611	12	12
47583	01	JHP_01_Jpa	50	F	2015	2	3	4	d	4	3.91667	420	3	611	12	12
47583	03	JHP_01_Jpa	51	M	2015	2	4	3	c	4	3.91667	475	3	611	12	12
47583	04	JHP_01_Jpa	52	M	2015	2	3	4	d	4	3.91667	440	3	611	12	12
47583	05	JHP_01_Jpa	53	M	2015	2	3	3	d	4	3.91667	512	3	611	12	12
47583	06	JHP_01_Jpa	54	M	2015	2	2	4	c	4	3.91667	445	3	611	12	12
47583	07	JHP_01_Jpa	55	F	2015	2	3	3	d	4	3.91667	390	3	611	12	12
47583	08	JHP_01_Jpa	56	M	2015	2	3	4	C	4	3.91667	470	3	611	12	12
47583	09	JHP_01_Jpa	57	F	2015	2	3	3	C	4	3.91667	370	3	611	12	12
47583	10	JHP_01_Jpa	58	F	2015	2	3	3	D	4	3.91667	382	3	611	12	12
47583	11	JHP_01_Jpa	59	M	2015	2	3	2	D	4	3.91667	465	3	611	12	12
47583	12	JHP_01_Jpa	60	F	2015	2	3	4	D	4	3.91667	452	3	611	12	12
47583	13	JHP_01_Jpa	61	F	2015	2	4	3	D	5	4.91667	480	3	611	12	12
47583	14	JHP_01_Jpa	62	F	2015	2	3	4	D	4	3.91667	425	3	611	12	12
47583	15	JHP_01_Jpa	63	F	2015	2	2	3	D	3	2.91667	420	3	611	12	12
47583	16	JHP_01_Jpa	64	F	2015	2	3	3	D	4	3.91667	435	3	611	12	12
47583	18	JHP_01_Jpa	65	F	2015	2	2	4	E	3	2.91667	415	3	611	12	12
47583	19	JHP_01_Jpa	66	F	2015	2	3	3	C	4	3.91667	417	3	611	12	12
47583	20	JHP_01_Jpa	67	F	2015	2	3	3	D	4	3.91667	445	3	611	12	12
47583	21	JHP_01_Jpa	68	F	2015	2	3	3	D	4	3.91667	455	3	611	12	12
47583	22	JHP_01_Jpa	69	F	2015	2	2	3	C	3	2.91667	365	3	611	12	12
47583	23	JHP_01_Jpa	70	M	2015	2	3	3	D	4	3.91667	485	3	611	12	12
47583	26	JHP_01_Jpa	71	F	2015	2	3	3	D	4	3.91667	410	3	611	12	12
47584	05	JHP_01_Jpa	72	F	2015	2	3	2	D	4	3.91667	365	3	611	12	12
47584	06	JHP_01_Jpa	73	F	2015	2	3	3	D	4	3.91667	420	3	611	12	12
47584	07	JHP_01_Jpa	74	F	2015	2	3	2	D	3	2.91667	390	3	611	12	12
47584	08	JHP_01_Jpa	75	F	2015	2	3	3	D	4	3.91667	430	3	611	12	12
47584	14	JHP_01_Jpa	76	F	2015	2	3	3	D	4	3.91667	410	3	611	12	12
47584	15	JHP_01_Jpa	77	F	2015	2	4	2	D	4	3.91667	412	3	611	12	12
47584	70	JHP_01_Jpa	78	F	2015	2	4	2	C	4	3.91667	397	3	611	12	12
47589	35	JHP_01_Jpa	79	F	2015	2	3	2	D	3	2.91667	347	3	611	12	12
47589	40	JHP_01_Jpa	80	F	2015	2	3	4	E	4	3.91667	412	3	611	12	12
47589	41	JHP_01_Jpa	81	F	2015	2	2	4	D	3	2.91667	402	3	611	12	12
47590	07	JHP_01_Jpa	82	F	2015	2	5	2	D	5	4.91667	450	3	611	12	12
47590	08	JHP_01_Jpa	83	F	2015	2	4	2	C	4	3.91667	457	3	611	12	12
47590	09	JHP_01_Jpa	84	F	2015	2	4	2	C	4	3.91667	400	3	611	12	12
47590	10	JHP_01_Jpa	85	M	2015	2	4	2	D	4	3.91667	475	3	611	12	12
47590	11	JHP_01_Jpa	86	F	2015	2	2	4	D	3	2.91667	375	3	611	12	12
47590	12	JHP_01_Jpa	87	F	2015	2	3	3	D	4	3.91667	365	3	611	12	12
47590	13	JHP_01_Jpa	88	M	2015	2	4	3	E	5	4.91667	455	3	611	12	12
47591	28	JHP_01_Jpa	89	F	2015	2	2	4	C	3	2.91667	385	3	611	12	12
47599	01	JHP_01_Jpa	90	F	2015	2	4	2	C	5	4.91667	520	3	611	12	12
47599	02	JHP_02_Jpa	1	F	2015	2	3	3	D	4	3.91667	432	3	611	12	12
47599	03	JHP_02_Jpa	2	F	2015	2	3	3	D	4	3.91667	390	3	611	12	12
47599	06	JHP_02_Jpa	3	F	2015	2	3	2	C	4	3.91667	362	3	611	12	12
47599	07	JHP_02_Jpa	4	F	2015	2	2	4	C	3	2.91667	380	3	611	12	12
47599	10	JHP_02_Jpa	5	F	2015	2	2	3	C	3	2.91667	390	3	611	12	12
47599	11	JHP_02_Jpa	6	M	2015	2	2	4	C	3	2.91667	395	3	611	12	12
47599	12	JHP_02_Jpa	7	M	2015	2	2	3	D	3	2.91667	370	3	611	12	12
47599	15	JHP_02_Jpa	8	F	2015	2	1	4	C	2	1.91667	325	3	611	12	12
47599	16	JHP_02_Jpa	9	F	2015	2	3	3	D	4	3.91667	415	3	611	12	12
47599	17	JHP_02_Jpa	10	F	2015	2	2	3	D	3	2.91667	385	3	611	12	12
47599	18	JHP_02_Jpa	11	F	2015	2	3	3	D	4	3.91667	397	3	611	12	12
47599	19	JHP_02_Jpa	12	F	2015	2	2	4	D	3	2.91667	385	3	611	12	12
47599	20	JHP_02_Jpa	13	F	2015	2	3	2	D	4	3.91667	382	3	611	12	12
47599	21	JHP_02_Jpa	14	M	2015	2	3	4	D	4	3.91667	410	3	611	12	12
47599	22	JHP_02_Jpa	15	F	2015	2	2	4	C	3	2.91667	420	3	611	12	12
47706	10	JHP_02_Jpa	20	F	2015	3	1	4	C	2	2	290	3	611	12	12
47706	11	JHP_02_Jpa	21	F	2015	3	2	4	D	3	3	375	3	611	12	12
47706	18	JHP_02_Jpa	22	F	2015	3	2	1	D	2	2	325	3	611	12	12
47706	19	JHP_02_Jpa	23	F	2015	3	3	2	D	3	3	365	3	611	12	12
47708	01	JHP_02_Jpa	24	F	2015	3	3	4	C	3	3	375	3	611	12	12
47708	02	JHP_02_Jpa	25	F	2015	3	1	4	B	2	2	335	3	611	12	12
47708	22	JHP_02_Jpa	26	F	2015	3	1	4	C	2	2	320	3	611	12	12
47708	99	JHP_02_Jpa	27	F	2015	3	2	1	C	2	2	310	3	611	12	12
47711	18	JHP_02_Jpa	28	F	2015	3	2	2	C	2	2	235	3	611	12	12
47712	18	JHP_02_Jpa	29	F	2015	3	4	2	C	4	4	365	3	611	12	12
47714	09	JHP_02_Jpa	30	M	2015	3	3	2	D	4	4	465	3	611	12	12
47714	11	JHP_02_Jpa	31	F	2015	3	3	3	D	4	4	397	3	611	12	12
47714	12	JHP_02_Jpa	32	F	2015	3	3	3	D	4	4	375	3	611	12	12
47714	13	JHP_02_Jpa	33	F	2015	3	2	4	D	3	3	375	3	611	12	12
47716	38	JHP_02_Jpa	34	F	2015	3	2	4	E	3	3	370	3	611	12	12
47718	12	JHP_02_Jpa	35	F	2015	3	2	4	D	3	3	420	3	611	12	12
47718	13	JHP_02_Jpa	36	F	2015	3	3	4	D	4	4	392	3	611	12	12
47724	01	JHP_02_Jpa	37	M	2015	3	4	2	C	4	4	460	3	611	12	12
47724	02	JHP_02_Jpa	38	M	2015	3	4	4	C	4	4	472	3	611	12	12
47727	01	JHP_02_Jpa	39	M	2015	3	2	3	D	3	3	355	3	611	12	12
47727	18	JHP_02_Jpa	40	F	2015	3	2	1	C	2	2	305	3	611	12	12
47728	17	JHP_02_Jpa	41	F	2015	3	1	4	C	2	2	315	3	611	12	12
47728	18	JHP_02_Jpa	42	F	2015	3	2	2	C	3	3	377	3	611	12	12
47728	21	JHP_02_Jpa	43	F	2015	3	2	3	D	3	3	340	3	611	12	12
47728	24	JHP_02_Jpa	44	F	2015	3	2	2	E	3	3	335	3	611	12	12
47728	25	JHP_02_Jpa	45	F	2015	3	5	1	D	5	5	360	3	611	12	12
47730	09	JHP_02_Jpa	46	F	2015	3	2	4	C	3	3	397	3	611	12	12
47732	31	JHP_02_Jpa	48	F	2015	2	2	4	C	2	1.91667	330	3	611	12	12
47733	06	JHP_02_Jpa	49	F	2015	3	1	4	C	2	2	347	3	611	12	12
47736	03	JHP_02_Jpa	50	F	2015	4	1	4	B	2	2.08333	320	3	611	12	12
47736	04	JHP_02_Jpa	51	F	2015	4	2	3	D	3	3.08333	382	3	611	12	12
47738	16	JHP_02_Jpa	52	M	2015	4	6	4	E	7	7.08333	535	3	611	12	12
47740	15	JHP_02_Jpa	53	F	2015	4	2	1	D	2	2.08333	305	3	611	12	12
47740	16	JHP_02_Jpa	54	F	2015	4	2	1	D	2	2.08333	302	3	611	12	12
47740	17	JHP_02_Jpa	55	F	2015	4	2	1	B	2	2.08333	337	3	611	12	12
47740	19	JHP_02_Jpa	56	F	2015	4	2	1	C	2	2.08333	320	3	611	12	12
47741	01	JHP_02_Jpa	57	F	2015	4	2	1	B	2	2.08333	290	3	611	12	12
47741	02	JHP_02_Jpa	58	F	2015	4	1	4	C	2	2.08333	315	3	611	12	12
47741	09	JHP_02_Jpa	59	F	2015	4	1	3	C	2	2.08333	325	3	611	12	12
47741	38	JHP_02_Jpa	60	F	2015	4	2	1	C	2	2.08333	305	3	611	12	12
47743	04	JHP_02_Jpa	61	F	2015	4	2	1	C	2	2.08333	310	3	611	12	12
47743	10	JHP_02_Jpa	62	F	2015	4	1	4	B	2	2.08333	302	3	611	12	12
47744	13	JHP_02_Jpa	63	F	2015	4	4	3	D	5	5.08333	392	3	611	12	12
47744	24	JHP_02_Jpa	64	M	2015	4	4	1	D	4	4.08333	350	3	611	12	12
47746	04	JHP_02_Jpa	65	F	2015	4	2	1	D	2	2.08333	305	3	611	12	12
47746	12	JHP_02_Jpa	66	F	2015	4	1	4	C	2	2.08333	282	3	611	12	12
47746	13	JHP_02_Jpa	67	F	2015	4	2	1	D	2	2.08333	305	3	611	12	12
47746	37	JHP_02_Jpa	68	F	2015	4	3	1	D	3	3.08333	377	3	611	12	12
47746	40	JHP_02_Jpa	69	F	2015	4	1	4	C	2	2.08333	320	3	611	12	12
47751	22	JHP_02_Jpa	70	F	2015	4	4	2	D	4	4.08333	535	3	611	12	12
47751	24	JHP_02_Jpa	71	U	2015	4	5	2	D	5	5.08333	520	3	611	12	12
47751	34	JHP_02_Jpa	72	M	2015	4	5	2	D	5	5.08333	532	3	611	12	12
47783	20	JHP_02_Jpa	73	F	2015	5	1	4	B	2	2.16667	352	3	611	12	12
47788	09	JHP_02_Jpa	74	M	2015	5	3	3	D	4	4.16667	450	3	611	12	12
47789	09	JHP_02_Jpa	75	F	2015	5	1	4	C	2	2.16667	337	3	611	12	12
47792	08	JHP_02_Jpa	76	F	2015	5	4	2	E	5	5.16667	440	3	611	12	12
47792	10	JHP_02_Jpa	77	F	2015	5	4	2	D	5	5.16667	542	3	611	12	12
47792	11	JHP_02_Jpa	78	F	2015	5	2	3	C	3	3.16667	400	3	611	12	12
47792	14	JHP_02_Jpa	79	F	2015	5	4	2	EE	5	5.16667	475	3	611	12	12
47792	19	JHP_02_Jpa	80	M	2015	5	7	2	E	7	7.16667	565	3	611	12	12
47792	29	JHP_02_Jpa	81	F	2015	5	13	3	E	13	13.1667	680	3	611	12	12
47792	50	JHP_02_Jpa	82	M	2015	5	5	2	D	5	5.16667	502	3	611	12	12
47792	52	JHP_02_Jpa	83	F	2015	5	4	2	D	5	5.16667	462	3	611	12	12
47792	53	JHP_02_Jpa	84	F	2015	5	3	4	D	4	4.16667	405	3	611	12	12
47795	05	JHP_02_Jpa	85	F	2015	5	2	1	D	2	2.16667	317	3	611	12	12
47795	06	JHP_02_Jpa	86	F	2015	5	2	2	D	2	2.16667	317	3	611	12	12
47795	36	JHP_02_Jpa	87	F	2015	5	2	4	D	3	3.16667	312	3	611	12	12
47798	04	JHP_02_Jpa	88	F	2015	5	3	2	D	4	4.16667	420	3	611	12	12
48007	12	JHP_03_Jpa	19	F	2015	5	6	2	D	7	7.16667	590	3	611	12	12
48022	15	JHP_03_Jpa	20	M	2015	6	9	2	E	9	9.25	570	3	611	12	12
48035	05	JHP_03_Jpa	24	F	2015	6	2	2	D	2	2.25	337	3	611	12	12
48037	37	JHP_03_Jpa	25	M	2015	6	5	2	E	6	6.25	510	3	611	12	12
48037	38	JHP_03_Jpa	26	F	2015	6	3	3	D	4	4.25	420	3	611	12	12
48037	43	JHP_03_Jpa	27	F	2015	6	7	3	D	8	8.25	625	3	611	12	12
48039	02	JHP_03_Jpa	28	F	2015	6	2	4	C	3	3.25	357	3	611	12	12
48039	05	JHP_03_Jpa	29	F	2015	6	2	1	C	2	2.25	305	3	611	12	12
48039	08	JHP_03_Jpa	30	U	2015	6	2	2	C	2	2.25	305	3	611	12	12
48050	39	JHP_03_Jpa	31	M	2015	6	12	2	D	12	12.25	670	3	611	12	12
48053	41	JHP_03_Jpa	32	F	2015	6	4	3	E	5	5.25	382	3	611	12	12
48053	42	JHP_03_Jpa	33	F	2015	6	4	3	D	5	5.25	507	3	611	12	12
48061	01	JHP_03_Jpa	34	F	2015	7	2	2	D	2	2.33333	365	3	611	12	12
48091	31	JHP_03_Jpa	38	M	2015	8	8	2	E	8	8.41667	632	3	611	12	12
48091	42	JHP_03_Jpa	39	M	2015	8	5	4	D	4	4.41667	475	3	611	12	12
48091	43	JHP_03_Jpa	40	F	2015	8	4	4	D	4	4.41667	430	3	611	12	12
48091	55	JHP_03_Jpa	41	F	2015	8	4	2	C	4	4.41667	457	3	611	12	12
48091	69	JHP_03_Jpa	42	F	2015	8	4	2	D	4	4.41667	450	3	611	12	12
48093	01	JHP_03_Jpa	43	F	2015	8	2	4	C	2	2.41667	295	3	611	12	12
48093	02	JHP_03_Jpa	44	F	2015	8	2	2	C	2	2.41667	295	3	611	12	12
48093	06	JHP_03_Jpa	45	F	2015	8	2	3	C	2	2.41667	380	3	611	12	12
48093	09	JHP_03_Jpa	46	F	2015	8	2	4	D	2	2.41667	295	3	611	12	12
48093	10	JHP_03_Jpa	47	F	2015	8	3	2	E	3	3.41667	320	3	611	12	12
48093	28	JHP_03_Jpa	48	F	2015	8	2	3	D	2	2.41667	330	3	611	12	12
48093	29	JHP_03_Jpa	49	F	2015	8	2	2	D	2	2.41667	315	3	611	12	12
48400	14	JHP_03_Jpa	50	F	2015	8	2	2	D	2	2.41667	347	3	611	12	12
48408	17	JHP_03_Jpa	51	F	2015	8	1	3	D	1	1.41667	297	3	611	12	12
48418	02	JHP_03_Jpa	52	F	2015	9	2	3	D	2	2.5	340	3	611	12	12
48424	02	JHP_03_Jpa	54	F	2015	9	3	2	D	3	3.5	377	3	611	12	12
48424	05	JHP_03_Jpa	55	M	2015	9	5	3	C	5	5.5	525	3	611	12	12
48424	27	JHP_03_Jpa	56	M	2015	9	4	3	D	4	4.5	445	3	611	12	12
48424	28	JHP_03_Jpa	57	F	2015	9	3	2	C	3	3.5	520	3	611	12	12
48424	29	JHP_03_Jpa	58	F	2015	9	3	3	C	3	3.5	497	3	611	12	12
48424	33	JHP_03_Jpa	59	M	2015	9	7	2	D	7	7.5	640	3	611	12	12
48424	38	JHP_03_Jpa	60	M	2015	9	6	2	D	7	7.5	565	3	611	12	12
48424	39	JHP_03_Jpa	61	F	2015	9	5	3	D	6	6.5	540	3	611	12	12
48430	03	JHP_03_Jpa	62	M	2015	9	5	2	D	4	4.5	440	3	611	12	12
48433	01	JHP_03_Jpa	63	F	2015	9	7	3	D	8	8.5	470	3	611	12	12
48433	16	JHP_03_Jpa	64	M	2015	9	8	2	C	8	8.5	480	3	611	12	12
48433	21	JHP_03_Jpa	65	F	2015	9	3	2	D	3	3.5	395	3	611	12	12
48434	06	JHP_03_Jpa	66	F	2015	9	4	2	C	4	4.5	407	3	611	12	12
48436	02	JHP_03_Jpa	67	M	2015	9	6	3	D	6	6.5	420	3	611	12	12
48437	30	JHP_03_Jpa	68	F	2015	9	2	2	C	2	2.5	365	3	611	12	12
48442	07	JHP_03_Jpa	69	F	2015	10	1	3	C	1	1.58333	270	3	611	12	12
48443	50	JHP_03_Jpa	70	F	2015	10	3	2	C	3	3.58333	362	3	611	12	12
48444	09	JHP_03_Jpa	71	F	2015	10	1	3	D	1	1.58333	255	3	611	12	12
48444	11	JHP_03_Jpa	72	F	2015	10	3	2	D	3	3.58333	395	3	611	12	12
48447	01	JHP_03_Jpa	73	F	2015	10	3	2	E	3	3.58333	402	3	611	12	12
48448	02	JHP_03_Jpa	74	U	2015	10	1	4	D	1	1.58333	322	3	611	12	12
48449	01	JHP_03_Jpa	75	F	2015	10	2	2	C	2	2.58333	377	3	611	12	12
48450	02	JHP_03_Jpa	76	F	2015	10	1	3	B	1	1.58333	375	3	611	12	12
48457	02	JHP_03_Jpa	77	F	2015	10	2	2	C	2	2.58333	330	3	611	12	12
48457	03	JHP_03_Jpa	78	F	2015	10	2	3	C	2	2.58333	355	3	611	12	12
48457	04	JHP_03_Jpa	79	F	2015	10	2	2	C	2	2.58333	325	3	611	12	12
48461	12	JHP_03_Jpa	80	F	2015	10	3	3	D	3	3.58333	345	3	611	12	12
48464	05	JHP_03_Jpa	81	F	2015	10	2	3	D	2	2.58333	325	3	611	12	12
48464	07	JHP_03_Jpa	82	F	2015	10	3	3	C	4	4.58333	440	3	611	12	12
48467	08	JHP_03_Jpa	83	F	2015	11	4	2	D	4	4.66667	445	3	611	12	12
48473	15	JHP_03_Jpa	84	F	2015	11	3	3	D	4	4.66667	397	3	611	12	12
48473	22	JHP_03_Jpa	85	F	2015	11	2	3	D	2	2.66667	385	3	611	12	12
48474	03	JHP_03_Jpa	86	F	2015	11	2	3	D	2	2.66667	355	3	611	12	12
48480	03	JHP_03_Jpa	87	F	2015	11	1	3	C	1	1.66667	275	3	611	12	12
48480	09	JHP_03_Jpa	88	F	2015	11	1	3	B	1	1.66667	282	3	611	12	12
48480	10	JHP_03_Jpa	89	F	2015	11	1	3	C	1	1.66667	305	3	611	12	12
48480	11	JHP_03_Jpa	90	F	2015	11	1	3	D	1	1.66667	310	3	611	12	12
48484	05	JHP_04_Jpa	1	F	2015	11	2	3	D	2	2.66667	365	3	611	12	12
48486	10	JHP_04_Jpa	2	F	2015	11	2	3	D	2	2.66667	330	3	611	12	12
48487	04	JHP_04_Jpa	3	F	2015	11	1	4	C	1	1.66667	290	3	611	12	12
48487	15	JHP_04_Jpa	4	F	2015	11	2	3	C	2	2.66667	345	3	611	12	12
48487	16	JHP_04_Jpa	5	F	2015	11	1	3	C	1	1.66667	297	3	611	12	12
48487	52	JHP_04_Jpa	6	F	2015	11	1	4	C	1	1.66667	280	3	611	12	12
48492	08	JHP_04_Jpa	7	F	2015	11	5	3	D	5	5.66667	405	3	611	12	12
48498	07	JHP_04_Jpa	9	F	2015	12	2	3	C	2	2.75	345	3	611	12	12
48498	08	JHP_04_Jpa	10	U	2015	12	2	3	D	2	2.75	310	3	611	12	12
48802	04	JHP_04_Jpa	23	M	2015	12	6	3	C	6	6.75	527	3	611	12	12
48803	04	JHP_04_Jpa	24	F	2015	12	2	3	D	2	2.75	347	3	611	12	12
48806	01	JHP_04_Jpa	25	F	2015	12	3	2	C	3	3.75	412	3	611	12	12
48806	02	JHP_04_Jpa	26	F	2015	12	4	3	D	4	4.75	395	3	611	12	12
48806	03	JHP_04_Jpa	27	F	2015	12	2	4	C	2	2.75	380	3	611	12	12
48806	04	JHP_04_Jpa	28	F	2015	12	4	2	D	4	4.75	452	3	611	12	12
48806	05	JHP_04_Jpa	29	F	2015	12	4	2	D	4	4.75	415	3	611	12	12
48806	06	JHP_04_Jpa	30	F	2015	12	5	3	D	7	7.75	445	3	611	12	12
48808	08	JHP_04_Jpa	31	F	2015	12	5	3	D	6	6.75	445	3	611	12	12
48812	14	JHP_04_Jpa	32	F	2015	12	2	3	D	2	2.75	335	3	611	12	12
48812	15	JHP_04_Jpa	33	F	2015	12	1	4	D	1	1.75	332	3	611	12	12
48812	16	JHP_04_Jpa	34	F	2015	12	2	3	D	2	2.75	345	3	611	12	12
48813	01	JHP_04_Jpa	35	F	2015	12	1	4	B	1	1.75	290	3	611	12	12
48815	06	JHP_04_Jpa	36	F	2015	12	2	3	D	2	2.75	375	3	611	12	12
48825	04	JHP_04_Jpa	44	M	2016	1	5	4	C	6	5.83333	445	3	611	12	12
48826	04	JHP_04_Jpa	45	F	2016	1	3	3	D	4	3.83333	410	3	611	12	12
48826	05	JHP_04_Jpa	46	F	2016	1	2	3	C	3	2.83333	365	3	611	12	12
48826	07	JHP_04_Jpa	47	F	2016	1	2	4	C	3	2.83333	360	3	611	12	12
48826	08	JHP_04_Jpa	48	F	2016	1	2	4	D	3	2.83333	345	3	611	12	12
48826	09	JHP_04_Jpa	49	F	2016	1	3	3	D	4	3.83333	415	3	611	12	12
48826	36	JHP_04_Jpa	50	F	2016	1	3	3	C	4	3.83333	402	3	611	12	12
48830	01	JHP_04_Jpa	51	M	2016	1	6	3	D	7	6.83333	585	3	611	12	12
48830	02	JHP_04_Jpa	52	M	2016	1	5	4	D	6	5.83333	497	3	611	12	12
48839	08	JHP_04_Jpa	53	F	2016	1	4	4	D	5	4.83333	452	3	611	12	12
48839	12	JHP_04_Jpa	54	F	2016	1	2	4	C	3	2.83333	400	3	611	12	12
48842	21	JHP_04_Jpa	55	F	2016	1	2	3	D	3	2.83333	380	3	611	12	12
48842	29	JHP_04_Jpa	56	F	2016	1	3	3	D	4	3.83333	375	3	611	12	12
48847	16	JHP_04_Jpa	57	F	2016	1	1	4	C	2	1.83333	320	3	611	12	12
48850	03	JHP_04_Jpa	58	F	2016	1	2	3	D	3	2.83333	395	3	611	12	12
48850	05	JHP_04_Jpa	59	F	2016	1	3	3	D	4	3.83333	342	3	611	12	12
48850	07	JHP_04_Jpa	60	F	2016	1	5	3	E	6	5.83333	380	3	611	12	12
48850	08	JHP_04_Jpa	61	F	2016	1	3	3	D	3	2.83333	415	3	611	12	12
48850	09	JHP_04_Jpa	62	F	2016	1	3	2	D	3	2.83333	365	3	611	12	12
48857	25	JHP_04_Jpa	63	F	2016	1	1	4	C	2	1.83333	300	3	611	12	12
48858	15	JHP_04_Jpa	64	F	2016	1	1	3	C	2	1.83333	305	3	611	12	12
48858	27	JHP_04_Jpa	65	F	2016	1	2	3	D	3	2.83333	320	3	611	12	12
48861	07	JHP_04_Jpa	66	M	2016	2	3	4	D	4	3.91667	430	3	611	12	12
48861	08	JHP_04_Jpa	67	F	2016	2	2	4	D	3	2.91667	387	3	611	12	12
48861	09	JHP_04_Jpa	68	M	2016	2	3	4	D	4	3.91667	427	3	611	12	12
48861	10	JHP_04_Jpa	69	F	2016	2	4	3	C	5	4.91667	387	3	611	12	12
48862	22	JHP_04_Jpa	70	F	2016	2	1	4	C	2	1.91667	272	3	611	12	12
48866	08	JHP_04_Jpa	71	F	2016	2	1	3	D	2	1.91667	297	3	611	12	12
48866	13	JHP_04_Jpa	72	F	2016	2	2	3	D	3	2.91667	342	3	611	12	12
48866	16	JHP_04_Jpa	73	F	2016	2	1	4	D	2	1.91667	310	3	611	12	12
48870	02	JHP_04_Jpa	74	M	2016	2	4	4	C	6	5.91667	515	3	611	12	12
48870	33	JHP_04_Jpa	75	F	2016	2	2	3	D	3	2.91667	360	3	611	12	12
48873	01	JHP_04_Jpa	76	F	2016	2	2	3	D	3	2.91667	347	3	611	12	12
48873	12	JHP_04_Jpa	77	F	2016	2	2	4	E	3	2.91667	350	3	611	12	12
48873	13	JHP_04_Jpa	78	F	2016	2	1	4	D	2	1.91667	317	3	611	12	12
48875	43	JHP_04_Jpa	79	F	2016	2	3	4	E	4	3.91667	387	3	611	12	12
48876	05	JHP_04_Jpa	80	F	2016	2	1	4	D	2	1.91667	302	3	611	12	12
48876	06	JHP_04_Jpa	81	F	2016	2	2	4	D	3	2.91667	400	3	611	12	12
48876	22	JHP_04_Jpa	82	F	2016	2	2	4	D	3	2.91667	360	3	611	12	12
48876	32	JHP_04_Jpa	83	F	2016	2	1	4	D	2	1.91667	325	3	611	12	12
48876	44	JHP_04_Jpa	84	M	2016	2	1	4	C	2	1.91667	325	3	611	12	12
48877	03	JHP_04_Jpa	85	M	2016	2	5	3	E	6	5.91667	462	3	611	12	12
48877	04	JHP_04_Jpa	86	F	2016	2	5	4	D	7	6.91667	445	3	611	12	12
48878	05	JHP_04_Jpa	87	F	2016	2	2	3	C	3	2.91667	380	3	611	12	12
48878	06	JHP_04_Jpa	88	F	2016	2	2	4	D	3	2.91667	370	3	611	12	12
48878	07	JHP_04_Jpa	89	F	2016	2	1	4	D	2	1.91667	320	3	611	12	12
	20151832086	JHP_05_Jpa	15		2015	9	2	2	C	2	2.5	311.711	CM HL	611	FL	12
	20151832087	JHP_05_Jpa	16		2015	9	2	3	D	2	2.5	344.561	CM HL	611	FL	12
	20151832088	JHP_05_Jpa	17		2015	9	2	2	C	2	2.5	324.851	CM HL		FL	12
	20151832089	JHP_05_Jpa	18		2015	9	1	2	D	1	1.5	284.336	CM HL		FL	12
	20151832090	JHP_05_Jpa	19		2015	9	2	2	C	2	2.5	336.896	CM HL		FL	12
	20151832091	JHP_05_Jpa	20		2015	9	2	2	E	2	2.5	353.321	CM HL		FL	12
092215DT001	1	JHP_05_Jpa	22	F	2015	9	4	2	D	4	4.5	457	2	611	12	12
092215DT001	2	JHP_05_Jpa	23	F	2015	9	7	3	C	6	6.5	599	2	611	12	12
092215DT001	3	JHP_05_Jpa	24	F	2015	9	4	2	D	4	4.5	453	2	611	12	12
092215DT001	4	JHP_05_Jpa	25	F	2015	9	6	2	D	6	6.5	513	2	611	12	12
092215DT001	5	JHP_05_Jpa	26	F	2015	9	8	2	F	8	8.5	596	2	611	12	12
092215DT001	6	JHP_05_Jpa	27	F	2015	9	6	3	D	6	6.5	586	2	611	12	12
48884	02	JHP_05_Jpa	40	F	2016	2	3	4	C	4	3.91667	357	3	611	12	12
48888	18	JHP_05_Jpa	41	F	2016	2	2	4	C	3	2.91667	410	3	611	12	12
48891	14	JHP_05_Jpa	42	F	2016	2	2	4	C	3	2.91667	375	3	611	12	12
48891	15	JHP_05_Jpa	43	F	2016	2	2	4	D	3	2.91667	315	3	611	12	12
48891	17	JHP_05_Jpa	44	M	2016	2	1	4	E	2	1.91667	347	3	611	12	12
48891	18	JHP_05_Jpa	45	M	2016	2	4	3	C	5	4.91667	522	3	611	12	12
48891	22	JHP_05_Jpa	46	F	2016	2	2	4	C	3	2.91667	335	3	611	12	12
48891	34	JHP_05_Jpa	47	F	2016	2	3	3	C	3	2.91667	312	3	611	12	12
48891	35	JHP_05_Jpa	48	F	2016	2	2	4	D	3	2.91667	345	3	611	12	12
48893	03	JHP_05_Jpa	49	F	2016	2	2	3	D	3	2.91667	412	3	611	12	12
48893	05	JHP_05_Jpa	50	F	2016	2	2	3	D	3	2.91667	377	3	611	12	12
48893	09	JHP_05_Jpa	51	F	2016	2	2	3	B	4	3.91667	375	3	611	12	12
48897	01	JHP_05_Jpa	52	F	2016	2	1	4	C	2	1.91667	320	3	611	12	12
48897	23	JHP_05_Jpa	53	F	2016	2	1	4	D	2	1.91667	317	3	611	12	12
49300	06	JHP_05_Jpa	69	F	2016	2	1	4	D	2	1.91667	315	3	611	12	12
49300	11	JHP_05_Jpa	70	F	2016	2	1	4	D	2	1.91667	285	3	611	12	12
49301	03	JHP_05_Jpa	71	M	2016	2	3	4	D	4	3.91667	440	3	611	12	12
49301	04	JHP_05_Jpa	72	F	2016	2	2	3	C	3	2.91667	370	3	611	12	12
49301	09	JHP_05_Jpa	73	F	2016	2	2	4	D	3	2.91667	352	3	611	12	12
49304	01	JHP_05_Jpa	74	F	2016	3	1	4	C	2	2	330	3	611	12	12
49305	04	JHP_05_Jpa	75	F	2016	3	2	4	D	3	3	352	3	611	12	12
49305	10	JHP_05_Jpa	76	M	2016	3	3	4	D	4	4	455	3	611	12	12
49305	11	JHP_05_Jpa	77	F	2016	3	4	4	D	5	5	411	3	611	12	12
49314	06	JHP_05_Jpa	78	F	2016	3	1	4	C	2	2	317	3	611	12	12
49317	22	JHP_05_Jpa	79	F	2016	3	2	4	C	3	3	340	3	611	12	12
49321	14	JHP_05_Jpa	81	F	2016	3	1	4	C	2	2	292	3	611	12	12
49323	10	JHP_05_Jpa	82	F	2016	3	2	2	C	2	2	342	3	611	12	12
49330	01	JHP_05_Jpa	83	F	2016	3	2	4	C	3	3	375	3	611	12	12
49333	13	JHP_05_Jpa	84	M	2016	3	10	2	C	12	12	680	3	611	12	12
49333	18	JHP_05_Jpa	85	M	2016	3	3	4	C	4	4	415	3	611	12	12
49333	23	JHP_05_Jpa	86	F	2016	3	7	1	D	7	7	605	3	611	12	12
49333	29	JHP_05_Jpa	87	M	2016	3	6	2	C	7	7	410	3	611	12	12
49333	35	JHP_05_Jpa	88	M	2016	3	5	2	C	5	5	480	3	611	12	12
49344	06	JHP_05_Jpa	89	M	2016	4	4	4	C	5	5.08333	500	3	611	12	12
49345	04	JHP_05_Jpa	90	F	2016	4	6	1	D	6	6.08333	432	3	611	12	12
49345	14	JHP_06_Jpa	1	M	2016	4	6	1	D	5	5.08333	480	3	611	12	12
49345	17	JHP_06_Jpa	2	F	2016	4	2	4	B	3	3.08333	397	3	611	12	12
49345	21	JHP_06_Jpa	3	M	2016	4	7	1	C	5	5.08333	545	3	611	12	12
49345	23	JHP_06_Jpa	4	F	2016	4	3	2	C	3	3.08333	430	3	611	12	12
49345	65	JHP_06_Jpa	5	F	2016	4	2	4	C	3	3.08333	380	3	611	12	12
49345	66	JHP_06_Jpa	6	M	2016	4	3	4	D	4	4.08333	420	3	611	12	12
49345	67	JHP_06_Jpa	7	F	2016	4	3	3	C	3	3.08333	465	3	611	12	12
49345	82	JHP_06_Jpa	8	M	2016	4	6	1	C	6	6.08333	485	3	611	12	12
49345	85	JHP_06_Jpa	9	F	2016	4	4	2	C	5	5.08333	407	3	611	12	12
49347	08	JHP_06_Jpa	10	F	2016	4	1	4	B	2	2.08333	287	3	611	12	12
49347	09	JHP_06_Jpa	11	F	2016	4	2	3	D	3	3.08333	350	3	611	12	12
49354	02	JHP_06_Jpa	12	F	2016	4	2	2	C	3	3.08333	390	3	611	12	12
49358	03	JHP_06_Jpa	13	F	2016	4	1	4	E	2	2.08333	307	3	611	12	12
49358	04	JHP_06_Jpa	14	F	2016	4	1	4	D	2	2.08333	332	3	611	12	12
49361	04	JHP_06_Jpa	15	F	2016	4	1	4	C	2	2.08333	325	3	611	12	12
20161830196		JHP_06_Jpa	16		2016	3	2	4	C	3	3	330.326	CM	611	12	12
20161830197		JHP_06_Jpa	17		2016	3	1	4	C	2	2	314.996	CM	611	12	12
20161830198		JHP_06_Jpa	18		2016	3	1	4	C	2	2	301.856	CM	611	12	12
20161830199		JHP_06_Jpa	19		2016	3	1	4	D	2	2	284.336	CM	611	12	12
20161830200		JHP_06_Jpa	20		2016	3	1	4	D	2	2	305.141	CM	611	12	12
20161830201		JHP_06_Jpa	21		2016	3	1	4	D	2	2	300.761	CM	611	12	12
20161830202		JHP_06_Jpa	22		2016	3	1	4	D	2	2	295.286	CM	611	12	12
20161830203		JHP_06_Jpa	23		2016	3	1	4	E	2	2	317.186	CM	611	12	12
20161830204		JHP_06_Jpa	24		2016	3	1	4	D	2	2	318.281	CM	611	12	12
20161830205		JHP_06_Jpa	25		2016	3	1	4	E	2	2	295.286	CM	611	12	12
20161830206		JHP_06_Jpa	26		2016	3	1	4	D	2	2	313.901	CM	611	12	12
20161830207		JHP_06_Jpa	27		2016	3	1	4	D	2	2	310.616	CM	611	12	12
20161830208		JHP_06_Jpa	28		2016	3	1	4	C	2	2	300.761	CM	611	12	12
20161830209		JHP_06_Jpa	29		2016	3	2	3	C	3	3	351.131	CM	611	12	12
20161830210		JHP_06_Jpa	30		2016	3	2	4	D	3	3	378.506	CM	611	12	12
20161830211		JHP_06_Jpa	31		2016	3	2	4	D	3	3	394.931	CM	611	12	12
20161830212		JHP_06_Jpa	32		2016	3	2	4	C	3	3	355.511	CM	611	12	12
20161830213		JHP_06_Jpa	33		2016	3	2	4	D	3	3	382.886	CM	611	12	12
20161830214		JHP_06_Jpa	34		2016	3	2	4	B	3	3	363.176	CM	611	12	12
20161830215		JHP_06_Jpa	35		2016	3	2	3	C	3	3	362.081	CM	611	12	12
20161830267		JHP_06_Jpa	36		2016	3	2	4	C	3	3	350.036	CM	612	12	12
20161830269		JHP_06_Jpa	38		2016	3	2	1	C	2	2	301.856	CM	612	12	12
20161830270		JHP_06_Jpa	39		2016	3	1	3	C	2	2	308.426	CM	612	12	12
20161830274		JHP_06_Jpa	40		2016	3	2	4	D	3	3	355.511	CM	612	12	12
20161830275		JHP_06_Jpa	41		2016	3	1	4	E	2	2	321.566	CM	612	12	12
20161830276		JHP_06_Jpa	42		2016	3	1	4	D	2	2	289.811	CM	612	12	12
20161830277		JHP_06_Jpa	43		2016	3	1	4	D	2	2	328.136	CM	612	12	12
20161830278		JHP_06_Jpa	44		2016	3	1	4	D	2	2	294.191	CM	612	12	12
20161830279		JHP_06_Jpa	45		2016	3	1	4	D	2	2	307.331	CM	612	12	12
20161830280		JHP_06_Jpa	46		2016	3	1	4	C	2	2	312.806	CM	612	12	12
20161830281		JHP_06_Jpa	47		2016	3	1	4	C	2	2	320.471	CM	612	12	12
49365	10	JHP_07_Jpa	5	F	2016	4	3	2	D	3	3.08333	385	3	611	12	12
49368	18	JHP_07_Jpa	6	M	2016	4	7	2	E	7	7.08333	560	3	611	12	12
49368	20	JHP_07_Jpa	7	F	2016	4	3	4	D	4	4.08333	450	3	611	12	12
49368	23	JHP_07_Jpa	8	F	2016	4	2	4	D	3	3.08333	445	3	611	12	12
49368	24	JHP_07_Jpa	9	F	2016	4	4	4	D	5	5.08333	435	3	611	12	12
49368	25	JHP_07_Jpa	10	M	2016	4	4	2	D	4	4.08333	475	3	611	12	12
49368	26	JHP_07_Jpa	11	F	2016	4	4	2	D	4	4.08333	490	3	611	12	12
49368	27	JHP_07_Jpa	12	M	2016	4	6	2	E	6	6.08333	610	3	611	12	12
49370	14	JHP_07_Jpa	13	F	2016	4	2	3	C	3	3.08333	385	3	611	12	12
49373	19	JHP_07_Jpa	14	F	2016	4	2	4	E	3	3.08333	375	3	611	12	12
49385	30	JHP_07_Jpa	15	U	2016	4	3	1	C	3	3.08333	355	3	611	12	12
49395	28	JHP_07_Jpa	16	F	2016	5	2	4	C	3	3.16667	360	3	611	12	12
49395	29	JHP_07_Jpa	17	F	2016	5	2	1	C	2	2.16667	305	3	611	12	12
49395	31	JHP_07_Jpa	18	M	2016	5	8	1	D	8	8.16667	520	3	611	12	12
49395	23	JHP_07_Jpa	19	F	2016	5	5	4	D	6	6.16667	552	3	611	12	12
49395	24	JHP_07_Jpa	20	F	2016	5	4	4	D	5	5.16667	435	3	611	12	12
49395	25	JHP_07_Jpa	21	M	2016	5	7	4	E	8	8.16667	497	3	611	12	12
49395	26	JHP_07_Jpa	22	M	2016	5	6	4	D	7	7.16667	510	3	611	12	12
49395	27	JHP_07_Jpa	23	F	2016	5	5	2	C	5	5.16667	480	3	611	12	12
49395	59	JHP_07_Jpa	24	F	2016	5	4	3	D	5	5.16667	390	3	611	12	12
49395	60	JHP_07_Jpa	25	F	2016	5	3	4	C	4	4.16667	470	3	611	12	12
49700	57	JHP_07_Jpa	26	F	2016	5	3	1	C	3	3.16667	335	3	611	12	12
49708	01	JHP_07_Jpa	27	F	2016	5	4	2	C	4	4.16667	410	3	611	12	12
49712	04	JHP_07_Jpa	28	F	2016	5	2	4	C	3	3.16667	357	3	611	12	12
49712	16	JHP_07_Jpa	29	F	2016	5	3	2	C	3	3.16667	345	3	611	12	12
49715	19	JHP_07_Jpa	30	F	2016	5	1	4	D	2	2.16667	252	3	611	12	12
49716	02	JHP_07_Jpa	31	F	2016	5	6	1	D	6	6.16667	467	3	611	12	12
49717	01	JHP_07_Jpa	32	F	2016	5	2	4	C	3	3.16667	382	3	611	12	12
49722	14	JHP_07_Jpa	35	F	2016	5	2	2	C	2	2.16667	327	3	611	12	12
49731	04	JHP_07_Jpa	36	M	2016	6	6	2	D	6	6.25	485	3	611	12	12
49731	05	JHP_07_Jpa	37	F	2016	6	2	4	C	3	3.25	355	3	611	12	12
49731	07	JHP_07_Jpa	38	F	2016	6	2	4	C	3	3.25	350	3	611	12	12
49731	09	JHP_07_Jpa	39	F	2016	6	3	3	D	4	4.25	375	3	611	12	12
49731	10	JHP_07_Jpa	40	F	2016	6	2	2	C	2	2.25	340	3	611	12	12
49733	13	JHP_07_Jpa	41	F	2016	6	2	2	C	2	2.25	346	3	611	12	12
49733	14	JHP_07_Jpa	42	F	2016	6	1	4	C	2	2.25	305	3	611	12	12
49735	04	JHP_07_Jpa	43	F	2016	6	2	1	C	2	2.25	292	3	611	12	12
49735	05	JHP_07_Jpa	44	F	2016	6	3	2	D	3	3.25	344	3	611	12	12
49735	06	JHP_07_Jpa	45	F	2016	6	2	2	D	2	2.25	295	3	611	12	12
49712	13	JHP_07_Jpa	46	F	2016	5	2	1	C	2	2.16667	287	3	611	12	12
49749	02	JHP_07_Jpa	47	F	2016	6	6	2	C	6	6.25	480	3	611	12	12
49749	35	JHP_07_Jpa	48	M	2016	6	9	2	D	9	9.25	475	3	611	12	12
49749	41	JHP_07_Jpa	49	F	2016	6	7	2	D	7	7.25	440	3	611	12	12
49750	04	JHP_07_Jpa	50	F	2016	6	2	2	B	2	2.25	328	3	611	12	12
49750	05	JHP_07_Jpa	51	F	2016	6	1	4	C	2	2.25	304	3	611	12	12
49750	06	JHP_07_Jpa	52	F	2016	6	2	2	C	2	2.25	304	3	611	12	12
49750	07	JHP_07_Jpa	53	F	2016	6	2	1	C	2	2.25	312	3	611	12	12
49750	08	JHP_07_Jpa	54	F	2016	6	1	4	C	2	2.25	325	3	611	12	12
49768	05	JHP_07_Jpa	56	F	2016	7	2	2	C	2	2.33333	342	3	611	12	12
345235	20161831003	JHP_07_JPA	90	D	2016	5	4	2	E	4	4.16667	423.401	1	760	FL	12
345171	20161830869	JHP_08_JPA	1	D	2016	5	2	2	B	2	2.16667	308.426	1	611	FL	12
345171	20161830870	JHP_08_JPA	2	D	2016	5	3	2	C	3	3.16667	325.946	1	611	FL	12
345171	20161830871	JHP_08_JPA	3	D	2016	5	2	2	D	2	2.16667	308.426	1	611	FL	12
345171	20161830872	JHP_08_JPA	4	D	2016	5	2	1	D	2	2.16667	294.191	1	611	FL	12
345171	20161830873	JHP_08_JPA	5	D	2016	5	2	2	C	2	2.16667	364.271	1	611	FL	12
345171	20161830874	JHP_08_JPA	6	D	2016	5	2	3	C	3	3.16667	383.981	1	611	FL	12
345171	20161830875	JHP_08_JPA	7	D	2016	5	2	2	B	2	2.16667	310.616	1	611	FL	12
345171	20161830876	JHP_08_JPA	8	D	2016	5	3	2	C	3	3.16667	300.761	1	611	FL	12
FL1573620151129001	KY1500843	JHP_05_Jpa	14	M	2015	11	1	3	B	1	1.66667	250	2	610	12	748

## Sheet: growth)min_max
Frac_age	TL_mm	min_size	max_size	weight	age of switch	inv_wgt		Cal_age		bin	Bin	Frequency	inverse		Frac_age	TL_mm	min_size	max_size	inv_wgt	age of switch
1.41667	297	250	600	1	1	0.0555556		1		1	1	18	0.0555556		1.41667	297	250	600	0.0555556	1
1.41667	332	250	600	1	1	0.0555556		1		2	2	235	0.00425532		1.41667	332	250	600	0.0555556	1
1.5	284.336	250	600	1	1	0.0555556		1		3	3	159	0.00628931		1.5	284.336	250	600	0.0555556	1
1.58333	255	250	600	1	1	0.0555556		1		4	4	120	0.00833333		1.58333	255	250	600	0.0555556	1
1.58333	270	250	600	1	1	0.0555556		1		5	5	46	0.0217391		1.58333	270	250	600	0.0555556	1
1.58333	322	250	600	1	1	0.0555556		1		6	6	26	0.0384615		1.58333	322	250	600	0.0555556	1
1.58333	375	250	600	1	1	0.0555556		1		7	7	18	0.0555556		1.58333	375	250	600	0.0555556	1
1.66667	250	250	600	1	1	0.0555556		1		8	8	8	0.125		1.66667	250	250	600	0.0555556	1
1.66667	275	250	600	1	1	0.0555556		1		9	9	2	0.5		1.66667	275	250	600	0.0555556	1
1.66667	280	250	600	1	1	0.0555556		1		10	10	0	#DIV/0!		1.66667	280	250	600	0.0555556	1
1.66667	282	250	600	1	1	0.0555556		1		11	11	0	#DIV/0!		1.66667	282	250	600	0.0555556	1
1.66667	290	250	600	1	1	0.0555556		1		12	12	2	0.5		1.66667	290	250	600	0.0555556	1
1.66667	297	250	600	1	1	0.0555556		1		13	13	1	1		1.66667	297	250	600	0.0555556	1
1.66667	305	250	600	1	1	0.0555556		1			More	0			1.66667	305	250	600	0.0555556	1
1.66667	310	250	600	1	1	0.0555556		1							1.66667	310	250	600	0.0555556	1
1.75	290	250	600	1	1	0.0555556		1							1.75	290	250	600	0.0555556	1
1.75	332	250	600	1	1	0.0555556		1							1.75	332	250	600	0.0555556	1
1.75	349	250	600	1	1	0.0555556		1							1.75	349	250	600	0.0555556	1
1.83333	286	250	600	1	1	0.00425532		2							1.83333	286	250	600	0.00425532	1
1.83333	289	250	600	1	1	0.00425532		2							1.83333	289	250	600	0.00425532	1
1.83333	295	250	600	1	1	0.00425532		2							1.83333	295	250	600	0.00425532	1
1.83333	300	250	600	1	1	0.00425532		2							1.83333	300	250	600	0.00425532	1
1.83333	302	250	600	1	1	0.00425532		2							1.83333	302	250	600	0.00425532	1
1.83333	305	250	600	1	1	0.00425532		2							1.83333	305	250	600	0.00425532	1
1.83333	320	250	600	1	1	0.00425532		2							1.83333	320	250	600	0.00425532	1
1.83333	337	250	600	1	1	0.00425532		2							1.83333	337	250	600	0.00425532	1
1.91667	260	250	600	1	1	0.00425532		2							1.91667	260	250	600	0.00425532	1
1.91667	272	250	600	1	1	0.00425532		2							1.91667	272	250	600	0.00425532	1
1.91667	278	250	600	1	1	0.00425532		2							1.91667	278	250	600	0.00425532	1
1.91667	280	250	600	1	1	0.00425532		2							1.91667	280	250	600	0.00425532	1
1.91667	285	250	600	1	1	0.00425532		2							1.91667	285	250	600	0.00425532	1
1.91667	289	250	600	1	1	0.00425532		2							1.91667	289	250	600	0.00425532	1
1.91667	290	250	600	1	1	0.00425532		2							1.91667	290	250	600	0.00425532	1
1.91667	297	250	600	1	1	0.00425532		2							1.91667	297	250	600	0.00425532	1
1.91667	302	250	600	1	1	0.00425532		2							1.91667	302	250	600	0.00425532	1
1.91667	304	250	600	1	1	0.00425532		2							1.91667	304	250	600	0.00425532	1
1.91667	309	250	600	1	1	0.00425532		2							1.91667	309	250	600	0.00425532	1
1.91667	310	250	600	1	1	0.00425532		2							1.91667	310	250	600	0.00425532	1
1.91667	315	250	600	1	1	0.00425532		2							1.91667	315	250	600	0.00425532	1
1.91667	316	250	600	1	1	0.00425532		2							1.91667	316	250	600	0.00425532	1
1.91667	317	250	600	1	1	0.00425532		2							1.91667	317	250	600	0.00425532	1
1.91667	317	250	600	1	1	0.00425532		2							1.91667	317	250	600	0.00425532	1
1.91667	320	250	600	1	1	0.00425532		2							1.91667	320	250	600	0.00425532	1
1.91667	320	250	600	1	1	0.00425532		2							1.91667	320	250	600	0.00425532	1
1.91667	321	250	600	1	1	0.00425532		2							1.91667	321	250	600	0.00425532	1
1.91667	325	250	600	1	1	0.00425532		2							1.91667	325	250	600	0.00425532	1
1.91667	325	250	600	1	1	0.00425532		2							1.91667	325	250	600	0.00425532	1
1.91667	325	250	600	1	1	0.00425532		2							1.91667	325	250	600	0.00425532	1
1.91667	330	250	600	1	1	0.00425532		2							1.91667	330	250	600	0.00425532	1
1.91667	347	250	600	1	1	0.00425532		2							1.91667	347	250	600	0.00425532	1
2	235	250	600	1	1	0.00425532		2							2	235	250	600	0.00425532	1
2	256	250	600	1	1	0.00425532		2							2	256	250	600	0.00425532	1
2	284	250	600	1	1	0.00425532		2							2	284	250	600	0.00425532	1
2	284.336	250	600	1	1	0.00425532		2							2	284.336	250	600	0.00425532	1
2	288.716	250	600	1	1	0.00425532		2							2	288.716	250	600	0.00425532	1
2	289.811	250	600	1	1	0.00425532		2							2	289.811	250	600	0.00425532	1
2	290	250	600	1	1	0.00425532		2							2	290	250	600	0.00425532	1
2	292	250	600	1	1	0.00425532		2							2	292	250	600	0.00425532	1
2	292.001	250	600	1	1	0.00425532		2							2	292.001	250	600	0.00425532	1
2	292.001	250	600	1	1	0.00425532		2							2	292.001	250	600	0.00425532	1
2	293	250	600	1	1	0.00425532		2							2	293	250	600	0.00425532	1
2	294.191	250	600	1	1	0.00425532		2							2	294.191	250	600	0.00425532	1
2	295.286	250	600	1	1	0.00425532		2							2	295.286	250	600	0.00425532	1
2	295.286	250	600	1	1	0.00425532		2							2	295.286	250	600	0.00425532	1
2	299	250	600	1	1	0.00425532		2							2	299	250	600	0.00425532	1
2	299.666	250	600	1	1	0.00425532		2							2	299.666	250	600	0.00425532	1
2	300.761	250	600	1	1	0.00425532		2							2	300.761	250	600	0.00425532	1
2	300.761	250	600	1	1	0.00425532		2							2	300.761	250	600	0.00425532	1
2	301	250	600	1	1	0.00425532		2							2	301	250	600	0.00425532	1
2	301.856	250	600	1	1	0.00425532		2							2	301.856	250	600	0.00425532	1
2	301.856	250	600	1	1	0.00425532		2							2	301.856	250	600	0.00425532	1
2	304.046	250	600	1	1	0.00425532		2							2	304.046	250	600	0.00425532	1
2	305	250	600	1	1	0.00425532		2							2	305	250	600	0.00425532	1
2	305.141	250	600	1	1	0.00425532		2							2	305.141	250	600	0.00425532	1
2	305.141	250	600	1	1	0.00425532		2							2	305.141	250	600	0.00425532	1
2	306	250	600	1	1	0.00425532		2							2	306	250	600	0.00425532	1
2	306.236	250	600	1	1	0.00425532		2							2	306.236	250	600	0.00425532	1
2	307.331	250	600	1	1	0.00425532		2							2	307.331	250	600	0.00425532	1
2	308.426	250	600	1	1	0.00425532		2							2	308.426	250	600	0.00425532	1
2	309	250	600	1	1	0.00425532		2							2	309	250	600	0.00425532	1
2	310	250	600	1	1	0.00425532		2							2	310	250	600	0.00425532	1
2	310	250	600	1	1	0.00425532		2							2	310	250	600	0.00425532	1
2	310.616	250	600	1	1	0.00425532		2							2	310.616	250	600	0.00425532	1
2	310.616	250	600	1	1	0.00425532		2							2	310.616	250	600	0.00425532	1
2	312.806	250	600	1	1	0.00425532		2							2	312.806	250	600	0.00425532	1
2	313	250	600	1	1	0.00425532		2							2	313	250	600	0.00425532	1
2	313.901	250	600	1	1	0.00425532		2							2	313.901	250	600	0.00425532	1
2	314.996	250	600	1	1	0.00425532		2							2	314.996	250	600	0.00425532	1
2	315	250	600	1	1	0.00425532		2							2	315	250	600	0.00425532	1
2	317	250	600	1	1	0.00425532		2							2	317	250	600	0.00425532	1
2	317.186	250	600	1	1	0.00425532		2							2	317.186	250	600	0.00425532	1
2	318.281	250	600	1	1	0.00425532		2							2	318.281	250	600	0.00425532	1
2	320	250	600	1	1	0.00425532		2							2	320	250	600	0.00425532	1
2	320.471	250	600	1	1	0.00425532		2							2	320.471	250	600	0.00425532	1
2	320.471	250	600	1	1	0.00425532		2							2	320.471	250	600	0.00425532	1
2	321.566	250	600	1	1	0.00425532		2							2	321.566	250	600	0.00425532	1
2	322.661	250	600	1	1	0.00425532		2							2	322.661	250	600	0.00425532	1
2	322.661	250	600	1	1	0.00425532		2							2	322.661	250	600	0.00425532	1
2	325	250	600	1	1	0.00425532		2							2	325	250	600	0.00425532	1
2	328.136	250	600	1	1	0.00425532		2							2	328.136	250	600	0.00425532	1
2	330	250	600	1	1	0.00425532		2							2	330	250	600	0.00425532	1
2	332	250	600	1	1	0.00425532		2							2	332	250	600	0.00425532	1
2	332.516	250	600	1	1	0.00425532		2							2	332.516	250	600	0.00425532	1
2	335	250	600	1	1	0.00425532		2							2	335	250	600	0.00425532	1
2	335.801	250	600	1	1	0.00425532		2							2	335.801	250	600	0.00425532	1
2	336.896	250	600	1	1	0.00425532		2							2	336.896	250	600	0.00425532	1
2	341.276	250	600	1	1	0.00425532		2							2	341.276	250	600	0.00425532	1
2	342	250	600	1	1	0.00425532		2							2	342	250	600	0.00425532	1
2	347	250	600	1	1	0.00425532		2							2	347	250	600	0.00425532	1
2.08333	282	250	600	1	1	0.00425532		2							2.08333	282	250	600	0.00425532	1
2.08333	287	250	600	1	1	0.00425532		2							2.08333	287	250	600	0.00425532	1
2.08333	290	250	600	1	1	0.00425532		2							2.08333	290	250	600	0.00425532	1
2.08333	299	250	600	1	1	0.00425532		2							2.08333	299	250	600	0.00425532	1
2.08333	302	250	600	1	1	0.00425532		2							2.08333	302	250	600	0.00425532	1
2.08333	302	250	600	1	1	0.00425532		2							2.08333	302	250	600	0.00425532	1
2.08333	305	250	600	1	1	0.00425532		2							2.08333	305	250	600	0.00425532	1
2.08333	305	250	600	1	1	0.00425532		2							2.08333	305	250	600	0.00425532	1
2.08333	305	250	600	1	1	0.00425532		2							2.08333	305	250	600	0.00425532	1
2.08333	305	250	600	1	1	0.00425532		2							2.08333	305	250	600	0.00425532	1
2.08333	305	250	600	1	1	0.00425532		2							2.08333	305	250	600	0.00425532	1
2.08333	307	250	600	1	1	0.00425532		2							2.08333	307	250	600	0.00425532	1
2.08333	310	250	600	1	1	0.00425532		2							2.08333	310	250	600	0.00425532	1
2.08333	310	250	600	1	1	0.00425532		2							2.08333	310	250	600	0.00425532	1
2.08333	315	250	600	1	1	0.00425532		2							2.08333	315	250	600	0.00425532	1
2.08333	320	250	600	1	1	0.00425532		2							2.08333	320	250	600	0.00425532	1
2.08333	320	250	600	1	1	0.00425532		2							2.08333	320	250	600	0.00425532	1
2.08333	320	250	600	1	1	0.00425532		2							2.08333	320	250	600	0.00425532	1
2.08333	325	250	600	1	1	0.00425532		2							2.08333	325	250	600	0.00425532	1
2.08333	325	250	600	1	1	0.00425532		2							2.08333	325	250	600	0.00425532	1
2.08333	331	250	600	1	1	0.00425532		2							2.08333	331	250	600	0.00425532	1
2.08333	332	250	600	1	1	0.00425532		2							2.08333	332	250	600	0.00425532	1
2.08333	337	250	600	1	1	0.00425532		2							2.08333	337	250	600	0.00425532	1
2.16667	252	250	600	1	1	0.00425532		2							2.16667	252	250	600	0.00425532	1
2.16667	287	250	600	1	1	0.00425532		2							2.16667	287	250	600	0.00425532	1
2.16667	290	250	600	1	1	0.00425532		2							2.16667	290	250	600	0.00425532	1
2.16667	294.191	250	600	1	1	0.00425532		2							2.16667	294.191	250	600	0.00425532	1
2.16667	301	250	600	1	1	0.00425532		2							2.16667	301	250	600	0.00425532	1
2.16667	304	250	600	1	1	0.00425532		2							2.16667	304	250	600	0.00425532	1
2.16667	304	250	600	1	1	0.00425532		2							2.16667	304	250	600	0.00425532	1
2.16667	305	250	600	1	1	0.00425532		2							2.16667	305	250	600	0.00425532	1
2.16667	308.426	250	600	1	1	0.00425532		2							2.16667	308.426	250	600	0.00425532	1
2.16667	308.426	250	600	1	1	0.00425532		2							2.16667	308.426	250	600	0.00425532	1
2.16667	310	250	600	1	1	0.00425532		2							2.16667	310	250	600	0.00425532	1
2.16667	310.616	250	600	1	1	0.00425532		2							2.16667	310.616	250	600	0.00425532	1
2.16667	313	250	600	1	1	0.00425532		2							2.16667	313	250	600	0.00425532	1
2.16667	317	250	600	1	1	0.00425532		2							2.16667	317	250	600	0.00425532	1
2.16667	317	250	600	1	1	0.00425532		2							2.16667	317	250	600	0.00425532	1
2.16667	317	250	600	1	1	0.00425532		2							2.16667	317	250	600	0.00425532	1
2.16667	327	250	600	1	1	0.00425532		2							2.16667	327	250	600	0.00425532	1
2.16667	327	250	600	1	1	0.00425532		2							2.16667	327	250	600	0.00425532	1
2.16667	337	250	600	1	1	0.00425532		2							2.16667	337	250	600	0.00425532	1
2.16667	340	250	600	1	1	0.00425532		2							2.16667	340	250	600	0.00425532	1
2.16667	351	250	600	1	1	0.00425532		2							2.16667	351	250	600	0.00425532	1
2.16667	352	250	600	1	1	0.00425532		2							2.16667	352	250	600	0.00425532	1
2.16667	359.891	250	600	1	1	0.00425532		2							2.16667	359.891	250	600	0.00425532	1
2.16667	364.271	250	600	1	1	0.00425532		2							2.16667	364.271	250	600	0.00425532	1
2.16667	365.366	250	600	1	1	0.00425532		2							2.16667	365.366	250	600	0.00425532	1
2.16667	373.031	250	600	1	1	0.00425532		2							2.16667	373.031	250	600	0.00425532	1
2.16667	382	250	600	1	1	0.00425532		2							2.16667	382	250	600	0.00425532	1
2.25	292	250	600	1	1	0.00425532		2							2.25	292	250	600	0.00425532	1
2.25	295	250	600	1	1	0.00425532		2							2.25	295	250	600	0.00425532	1
2.25	295	250	600	1	1	0.00425532		2							2.25	295	250	600	0.00425532	1
2.25	304	250	600	1	1	0.00425532		2							2.25	304	250	600	0.00425532	1
2.25	304	250	600	1	1	0.00425532		2							2.25	304	250	600	0.00425532	1
2.25	305	250	600	1	1	0.00425532		2							2.25	305	250	600	0.00425532	1
2.25	305	250	600	1	1	0.00425532		2							2.25	305	250	600	0.00425532	1
2.25	305	250	600	1	1	0.00425532		2							2.25	305	250	600	0.00425532	1
2.25	312	250	600	1	1	0.00425532		2							2.25	312	250	600	0.00425532	1
2.25	323	250	600	1	1	0.00425532		2							2.25	323	250	600	0.00425532	1
2.25	325	250	600	1	1	0.00425532		2							2.25	325	250	600	0.00425532	1
2.25	325	250	600	1	1	0.00425532		2							2.25	325	250	600	0.00425532	1
2.25	325	250	600	1	1	0.00425532		2							2.25	325	250	600	0.00425532	1
2.25	328	250	600	1	1	0.00425532		2							2.25	328	250	600	0.00425532	1
2.25	337	250	600	1	1	0.00425532		2							2.25	337	250	600	0.00425532	1
2.25	340	250	600	1	1	0.00425532		2							2.25	340	250	600	0.00425532	1
2.25	345	250	600	1	1	0.00425532		2							2.25	345	250	600	0.00425532	1
2.25	346	250	600	1	1	0.00425532		2							2.25	346	250	600	0.00425532	1
2.33333	303	250	600	1	1	0.00425532		2							2.33333	303	250	600	0.00425532	1
2.33333	313	250	600	1	1	0.00425532		2							2.33333	313	250	600	0.00425532	1
2.33333	316	250	600	1	1	0.00425532		2							2.33333	316	250	600	0.00425532	1
2.33333	317	250	600	1	1	0.00425532		2							2.33333	317	250	600	0.00425532	1
2.33333	317	250	600	1	1	0.00425532		2							2.33333	317	250	600	0.00425532	1
2.33333	322	250	600	1	1	0.00425532		2							2.33333	322	250	600	0.00425532	1
2.33333	324	250	600	1	1	0.00425532		2							2.33333	324	250	600	0.00425532	1
2.33333	327	250	600	1	1	0.00425532		2							2.33333	327	250	600	0.00425532	1
2.33333	342	250	600	1	1	0.00425532		2							2.33333	342	250	600	0.00425532	1
2.33333	342	250	600	1	1	0.00425532		2							2.33333	342	250	600	0.00425532	1
2.33333	344	250	600	1	1	0.00425532		2							2.33333	344	250	600	0.00425532	1
2.33333	348	250	600	1	1	0.00425532		2							2.33333	348	250	600	0.00425532	1
2.33333	365	250	600	1	1	0.00425532		2							2.33333	365	250	600	0.00425532	1
2.33333	405	250	600	1	1	0.00425532		2							2.33333	405	250	600	0.00425532	1
2.41667	295	250	600	1	1	0.00425532		2							2.41667	295	250	600	0.00425532	1
2.41667	295	250	600	1	1	0.00425532		2							2.41667	295	250	600	0.00425532	1
2.41667	295	250	600	1	1	0.00425532		2							2.41667	295	250	600	0.00425532	1
2.41667	306	250	600	1	1	0.00425532		2							2.41667	306	250	600	0.00425532	1
2.41667	309.521	250	600	1	1	0.00425532		2							2.41667	309.521	250	600	0.00425532	1
2.41667	311	250	600	1	1	0.00425532		2							2.41667	311	250	600	0.00425532	1
2.41667	311	250	600	1	1	0.00425532		2							2.41667	311	250	600	0.00425532	1
2.41667	314	250	600	1	1	0.00425532		2							2.41667	314	250	600	0.00425532	1
2.41667	315	250	600	1	1	0.00425532		2							2.41667	315	250	600	0.00425532	1
2.41667	316	250	600	1	1	0.00425532		2							2.41667	316	250	600	0.00425532	1
2.41667	317	250	600	1	1	0.00425532		2							2.41667	317	250	600	0.00425532	1
2.41667	327	250	600	1	1	0.00425532		2							2.41667	327	250	600	0.00425532	1
2.41667	330	250	600	1	1	0.00425532		2							2.41667	330	250	600	0.00425532	1
2.41667	330	250	600	1	1	0.00425532		2							2.41667	330	250	600	0.00425532	1
2.41667	332	250	600	1	1	0.00425532		2							2.41667	332	250	600	0.00425532	1
2.41667	333.611	250	600	1	1	0.00425532		2							2.41667	333.611	250	600	0.00425532	1
2.41667	341	250	600	1	1	0.00425532		2							2.41667	341	250	600	0.00425532	1
2.41667	347	250	600	1	1	0.00425532		2							2.41667	347	250	600	0.00425532	1
2.41667	347	250	600	1	1	0.00425532		2							2.41667	347	250	600	0.00425532	1
2.41667	355	250	600	1	1	0.00425532		2							2.41667	355	250	600	0.00425532	1
2.41667	356	250	600	1	1	0.00425532		2							2.41667	356	250	600	0.00425532	1
2.41667	371	250	600	1	1	0.00425532		2							2.41667	371	250	600	0.00425532	1
2.41667	380	250	600	1	1	0.00425532		2							2.41667	380	250	600	0.00425532	1
2.5	291	250	600	1	1	0.00425532		2							2.5	291	250	600	0.00425532	1
2.5	311.711	250	600	1	1	0.00425532		2							2.5	311.711	250	600	0.00425532	1
2.5	324.851	250	600	1	1	0.00425532		2							2.5	324.851	250	600	0.00425532	1
2.5	326	250	600	1	1	0.00425532		2							2.5	326	250	600	0.00425532	1
2.5	332	250	600	1	1	0.00425532		2							2.5	332	250	600	0.00425532	1
2.5	336.896	250	600	1	1	0.00425532		2							2.5	336.896	250	600	0.00425532	1
2.5	338	250	600	1	1	0.00425532		2							2.5	338	250	600	0.00425532	1
2.5	340	250	600	1	1	0.00425532		2							2.5	340	250	600	0.00425532	1
2.5	344.561	250	600	1	1	0.00425532		2							2.5	344.561	250	600	0.00425532	1
2.5	349	250	600	1	1	0.00425532		2							2.5	349	250	600	0.00425532	1
2.5	353.321	250	600	1	1	0.00425532		2							2.5	353.321	250	600	0.00425532	1
2.5	354	250	600	1	1	0.00425532		2							2.5	354	250	600	0.00425532	1
2.5	365	250	600	1	1	0.00425532		2							2.5	365	250	600	0.00425532	1
2.58333	325	250	600	1	1	0.00425532		2							2.58333	325	250	600	0.00425532	1
2.58333	325	250	600	1	1	0.00425532		2							2.58333	325	250	600	0.00425532	1
2.58333	330	250	600	1	1	0.00425532		2							2.58333	330	250	600	0.00425532	1
2.58333	339	250	600	1	1	0.00425532		2							2.58333	339	250	600	0.00425532	1
2.58333	352	250	600	1	1	0.00425532		2							2.58333	352	250	600	0.00425532	1
2.58333	355	250	600	1	1	0.00425532		2							2.58333	355	250	600	0.00425532	1
2.58333	377	250	600	1	1	0.00425532		2							2.58333	377	250	600	0.00425532	1
2.66667	322	250	600	1	1	0.00425532		2							2.66667	322	250	600	0.00425532	1
2.66667	330	250	600	1	1	0.00425532		2							2.66667	330	250	600	0.00425532	1
2.66667	345	250	600	1	1	0.00425532		2							2.66667	345	250	600	0.00425532	1
2.66667	345	250	600	1	1	0.00425532		2							2.66667	345	250	600	0.00425532	1
2.66667	355	250	600	1	1	0.00425532		2							2.66667	355	250	600	0.00425532	1
2.66667	365	250	600	1	1	0.00425532		2							2.66667	365	250	600	0.00425532	1
2.66667	385	250	600	1	1	0.00425532		2							2.66667	385	250	600	0.00425532	1
2.75	283	250	600	1	1	0.00425532		2							2.75	283	250	600	0.00425532	1
2.75	310	250	600	1	1	0.00425532		2							2.75	310	250	600	0.00425532	1
2.75	323	250	600	1	1	0.00425532		2							2.75	323	250	600	0.00425532	1
2.75	329	250	600	1	1	0.00425532		2							2.75	329	250	600	0.00425532	1
2.75	335	250	600	1	1	0.00425532		2							2.75	335	250	600	0.00425532	1
2.75	345	250	600	1	1	0.00425532		2							2.75	345	250	600	0.00425532	1
2.75	345	250	600	1	1	0.00425532		2							2.75	345	250	600	0.00425532	1
2.75	347	250	600	1	1	0.00425532		2							2.75	347	250	600	0.00425532	1
2.75	347	250	600	1	1	0.00425532		2							2.75	347	250	600	0.00425532	1
2.75	367	250	600	1	1	0.00425532		2							2.75	367	250	600	0.00425532	1
2.75	375	250	600	1	1	0.00425532		2							2.75	375	250	600	0.00425532	1
2.75	380	250	600	1	1	0.00425532		2							2.75	380	250	600	0.00425532	1
2.83333	300	250	600	1	1	0.00628931		3							2.83333	300	250	600	0.00628931	1
2.83333	320	250	600	1	1	0.00628931		3							2.83333	320	250	600	0.00628931	1
2.83333	345	250	600	1	1	0.00628931		3							2.83333	345	250	600	0.00628931	1
2.83333	345	250	600	1	1	0.00628931		3							2.83333	345	250	600	0.00628931	1
2.83333	360	250	600	1	1	0.00628931		3							2.83333	360	250	600	0.00628931	1
2.83333	365	250	600	1	1	0.00628931		3							2.83333	365	250	600	0.00628931	1
2.83333	365	250	600	1	1	0.00628931		3							2.83333	365	250	600	0.00628931	1
2.83333	380	250	600	1	1	0.00628931		3							2.83333	380	250	600	0.00628931	1
2.83333	387	250	600	1	1	0.00628931		3							2.83333	387	250	600	0.00628931	1
2.83333	395	250	600	1	1	0.00628931		3							2.83333	395	250	600	0.00628931	1
2.83333	400	250	600	1	1	0.00628931		3							2.83333	400	250	600	0.00628931	1
2.83333	415	250	600	1	1	0.00628931		3							2.83333	415	250	600	0.00628931	1
2.91667	312	250	600	1	1	0.00628931		3							2.91667	312	250	600	0.00628931	1
2.91667	315	250	600	1	1	0.00628931		3							2.91667	315	250	600	0.00628931	1
2.91667	335	250	600	1	1	0.00628931		3							2.91667	335	250	600	0.00628931	1
2.91667	342	250	600	1	1	0.00628931		3							2.91667	342	250	600	0.00628931	1
2.91667	345	250	600	1	1	0.00628931		3							2.91667	345	250	600	0.00628931	1
2.91667	347	250	600	1	1	0.00628931		3							2.91667	347	250	600	0.00628931	1
2.91667	347	250	600	1	1	0.00628931		3							2.91667	347	250	600	0.00628931	1
2.91667	350	250	600	1	1	0.00628931		3							2.91667	350	250	600	0.00628931	1
2.91667	351	250	600	1	1	0.00628931		3							2.91667	351	250	600	0.00628931	1
2.91667	352	250	600	1	1	0.00628931		3							2.91667	352	250	600	0.00628931	1
2.91667	356	250	600	1	1	0.00628931		3							2.91667	356	250	600	0.00628931	1
2.91667	359	250	600	1	1	0.00628931		3							2.91667	359	250	600	0.00628931	1
2.91667	360	250	600	1	1	0.00628931		3							2.91667	360	250	600	0.00628931	1
2.91667	360	250	600	1	1	0.00628931		3							2.91667	360	250	600	0.00628931	1
2.91667	365	250	600	1	1	0.00628931		3							2.91667	365	250	600	0.00628931	1
2.91667	370	250	600	1	1	0.00628931		3							2.91667	370	250	600	0.00628931	1
2.91667	370	250	600	1	1	0.00628931		3							2.91667	370	250	600	0.00628931	1
2.91667	370	250	600	1	1	0.00628931		3							2.91667	370	250	600	0.00628931	1
2.91667	370	250	600	1	1	0.00628931		3							2.91667	370	250	600	0.00628931	1
2.91667	375	250	600	1	1	0.00628931		3							2.91667	375	250	600	0.00628931	1
2.91667	375	250	600	1	1	0.00628931		3							2.91667	375	250	600	0.00628931	1
2.91667	377	250	600	1	1	0.00628931		3							2.91667	377	250	600	0.00628931	1
2.91667	380	250	600	1	1	0.00628931		3							2.91667	380	250	600	0.00628931	1
2.91667	380	250	600	1	1	0.00628931		3							2.91667	380	250	600	0.00628931	1
2.91667	385	250	600	1	1	0.00628931		3							2.91667	385	250	600	0.00628931	1
2.91667	385	250	600	1	1	0.00628931		3							2.91667	385	250	600	0.00628931	1
2.91667	385	250	600	1	1	0.00628931		3							2.91667	385	250	600	0.00628931	1
2.91667	387	250	600	1	1	0.00628931		3							2.91667	387	250	600	0.00628931	1
2.91667	390	250	600	1	1	0.00628931		3							2.91667	390	250	600	0.00628931	1
2.91667	390	250	600	1	1	0.00628931		3							2.91667	390	250	600	0.00628931	1
2.91667	391	250	600	1	1	0.00628931		3							2.91667	391	250	600	0.00628931	1
2.91667	395	250	600	1	1	0.00628931		3							2.91667	395	250	600	0.00628931	1
2.91667	400	250	600	1	1	0.00628931		3							2.91667	400	250	600	0.00628931	1
2.91667	402	250	600	1	1	0.00628931		3							2.91667	402	250	600	0.00628931	1
2.91667	410	250	600	1	1	0.00628931		3							2.91667	410	250	600	0.00628931	1
2.91667	412	250	600	1	1	0.00628931		3							2.91667	412	250	600	0.00628931	1
2.91667	415	250	600	1	1	0.00628931		3							2.91667	415	250	600	0.00628931	1
2.91667	420	250	600	1	1	0.00628931		3							2.91667	420	250	600	0.00628931	1
2.91667	420	250	600	1	1	0.00628931		3							2.91667	420	250	600	0.00628931	1
3	284	250	600	1	1	0.00628931		3							3	284	250	600	0.00628931	1
3	285	250	600	1	1	0.00628931		3							3	285	250	600	0.00628931	1
3	310	250	600	1	1	0.00628931		3							3	310	250	600	0.00628931	1
3	316	250	600	1	1	0.00628931		3							3	316	250	600	0.00628931	1
3	316	250	600	1	1	0.00628931		3							3	316	250	600	0.00628931	1
3	325	250	600	1	1	0.00628931		3							3	325	250	600	0.00628931	1
3	330.326	250	600	1	1	0.00628931		3							3	330.326	250	600	0.00628931	1
3	335	250	600	1	1	0.00628931		3							3	335	250	600	0.00628931	1
3	340	250	600	1	1	0.00628931		3							3	340	250	600	0.00628931	1
3	340	250	600	1	1	0.00628931		3							3	340	250	600	0.00628931	1
3	345.656	250	600	1	1	0.00628931		3							3	345.656	250	600	0.00628931	1
3	350.036	250	600	1	1	0.00628931		3							3	350.036	250	600	0.00628931	1
3	351.131	250	600	1	1	0.00628931		3							3	351.131	250	600	0.00628931	1
3	352	250	600	1	1	0.00628931		3							3	352	250	600	0.00628931	1
3	353.321	250	600	1	1	0.00628931		3							3	353.321	250	600	0.00628931	1
3	355	250	600	1	1	0.00628931		3							3	355	250	600	0.00628931	1
3	355.511	250	600	1	1	0.00628931		3							3	355.511	250	600	0.00628931	1
3	355.511	250	600	1	1	0.00628931		3							3	355.511	250	600	0.00628931	1
3	358.796	250	600	1	1	0.00628931		3							3	358.796	250	600	0.00628931	1
3	360.986	250	600	1	1	0.00628931		3							3	360.986	250	600	0.00628931	1
3	362.081	250	600	1	1	0.00628931		3							3	362.081	250	600	0.00628931	1
3	363.176	250	600	1	1	0.00628931		3							3	363.176	250	600	0.00628931	1
3	364.271	250	600	1	1	0.00628931		3							3	364.271	250	600	0.00628931	1
3	364.271	250	600	1	1	0.00628931		3							3	364.271	250	600	0.00628931	1
3	365	250	600	1	1	0.00628931		3							3	365	250	600	0.00628931	1
3	365	250	600	1	1	0.00628931		3							3	365	250	600	0.00628931	1
3	366.461	250	600	1	1	0.00628931		3							3	366.461	250	600	0.00628931	1
3	366.461	250	600	1	1	0.00628931		3							3	366.461	250	600	0.00628931	1
3	370	250	600	1	1	0.00628931		3							3	370	250	600	0.00628931	1
3	372	250	600	1	1	0.00628931		3							3	372	250	600	0.00628931	1
3	375	250	600	1	1	0.00628931		3							3	375	250	600	0.00628931	1
3	375	250	600	1	1	0.00628931		3							3	375	250	600	0.00628931	1
3	375	250	600	1	1	0.00628931		3							3	375	250	600	0.00628931	1
3	375	250	600	1	1	0.00628931		3							3	375	250	600	0.00628931	1
3	375.221	250	600	1	1	0.00628931		3							3	375.221	250	600	0.00628931	1
3	377	250	600	1	1	0.00628931		3							3	377	250	600	0.00628931	1
3	378.506	250	600	1	1	0.00628931		3							3	378.506	250	600	0.00628931	1
3	382.886	250	600	1	1	0.00628931		3							3	382.886	250	600	0.00628931	1
3	394.931	250	600	1	1	0.00628931		3							3	394.931	250	600	0.00628931	1
3	397	250	600	1	1	0.00628931		3							3	397	250	600	0.00628931	1
3	402	250	600	1	1	0.00628931		3							3	402	250	600	0.00628931	1
3	420	250	600	1	1	0.00628931		3							3	420	250	600	0.00628931	1
3.08333	318	250	600	1	1	0.00628931		3							3.08333	318	250	600	0.00628931	1
3.08333	349	250	600	1	1	0.00628931		3							3.08333	349	250	600	0.00628931	1
3.08333	350	250	600	1	1	0.00628931		3							3.08333	350	250	600	0.00628931	1
3.08333	355	250	600	1	1	0.00628931		3							3.08333	355	250	600	0.00628931	1
3.08333	357	250	600	1	1	0.00628931		3							3.08333	357	250	600	0.00628931	1
3.08333	362	250	600	1	1	0.00628931		3							3.08333	362	250	600	0.00628931	1
3.08333	362	250	600	1	1	0.00628931		3							3.08333	362	250	600	0.00628931	1
3.08333	363	250	600	1	1	0.00628931		3							3.08333	363	250	600	0.00628931	1
3.08333	375	250	600	1	1	0.00628931		3							3.08333	375	250	600	0.00628931	1
3.08333	377	250	600	1	1	0.00628931		3							3.08333	377	250	600	0.00628931	1
3.08333	380	250	600	1	1	0.00628931		3							3.08333	380	250	600	0.00628931	1
3.08333	380	250	600	1	1	0.00628931		3							3.08333	380	250	600	0.00628931	1
3.08333	382	250	600	1	1	0.00628931		3							3.08333	382	250	600	0.00628931	1
3.08333	385	250	600	1	1	0.00628931		3							3.08333	385	250	600	0.00628931	1
3.08333	385	250	600	1	1	0.00628931		3							3.08333	385	250	600	0.00628931	1
3.08333	390	250	600	1	1	0.00628931		3							3.08333	390	250	600	0.00628931	1
3.08333	397	250	600	1	1	0.00628931		3							3.08333	397	250	600	0.00628931	1
3.08333	430	250	600	1	1	0.00628931		3							3.08333	430	250	600	0.00628931	1
3.08333	445	250	600	1	1	0.00628931		3							3.08333	445	250	600	0.00628931	1
3.08333	465	250	600	1	1	0.00628931		3							3.08333	465	250	600	0.00628931	1
3.08333	469.391	250	600	1	1	0.00628931		3							3.08333	469.391	250	600	0.00628931	1
3.16667	300.761	250	600	1	1	0.00628931		3							3.16667	300.761	250	600	0.00628931	1
3.16667	312	250	600	1	1	0.00628931		3							3.16667	312	250	600	0.00628931	1
3.16667	325.946	250	600	1	1	0.00628931		3							3.16667	325.946	250	600	0.00628931	1
3.16667	335	250	600	1	1	0.00628931		3							3.16667	335	250	600	0.00628931	1
3.16667	345	250	600	1	1	0.00628931		3							3.16667	345	250	600	0.00628931	1
3.16667	357	250	600	1	1	0.00628931		3							3.16667	357	250	600	0.00628931	1
3.16667	360	250	600	1	1	0.00628931		3							3.16667	360	250	600	0.00628931	1
3.16667	364.271	250	600	1	1	0.00628931		3							3.16667	364.271	250	600	0.00628931	1
3.16667	370	250	600	1	1	0.00628931		3							3.16667	370	250	600	0.00628931	1
3.16667	377	250	600	1	1	0.00628931		3							3.16667	377	250	600	0.00628931	1
3.16667	382	250	600	1	1	0.00628931		3							3.16667	382	250	600	0.00628931	1
3.16667	383.981	250	600	1	1	0.00628931		3							3.16667	383.981	250	600	0.00628931	1
3.16667	400	250	600	1	1	0.00628931		3							3.16667	400	250	600	0.00628931	1
3.25	315	250	600	1	1	0.00628931		3							3.25	315	250	600	0.00628931	1
3.25	344	250	600	1	1	0.00628931		3							3.25	344	250	600	0.00628931	1
3.25	350	250	600	1	1	0.00628931		3							3.25	350	250	600	0.00628931	1
3.25	355	250	600	1	1	0.00628931		3							3.25	355	250	600	0.00628931	1
3.25	357	250	600	1	1	0.00628931		3							3.25	357	250	600	0.00628931	1
3.25	365	250	600	1	1	0.00628931		3							3.25	365	250	600	0.00628931	1
3.25	366	250	600	1	1	0.00628931		3							3.25	366	250	600	0.00628931	1
3.25	367	250	600	1	1	0.00628931		3							3.25	367	250	600	0.00628931	1
3.25	423	250	600	1	1	0.00628931		3							3.25	423	250	600	0.00628931	1
3.33333	331	250	600	1	1	0.00628931		3							3.33333	331	250	600	0.00628931	1
3.33333	366	250	600	1	1	0.00628931		3							3.33333	366	250	600	0.00628931	1
3.33333	370	250	600	1	1	0.00628931		3							3.33333	370	250	600	0.00628931	1
3.33333	385	250	600	1	1	0.00628931		3							3.33333	385	250	600	0.00628931	1
3.41667	316	250	600	1	1	0.00628931		3							3.41667	316	250	600	0.00628931	1
3.41667	320	250	600	1	1	0.00628931		3							3.41667	320	250	600	0.00628931	1
3.41667	339	250	600	1	1	0.00628931		3							3.41667	339	250	600	0.00628931	1
3.41667	348	250	600	1	1	0.00628931		3							3.41667	348	250	600	0.00628931	1
3.41667	385	250	600	1	1	0.00628931		3							3.41667	385	250	600	0.00628931	1
3.41667	405	250	600	1	1	0.00628931		3							3.41667	405	250	600	0.00628931	1
3.41667	444	250	600	1	1	0.00628931		3							3.41667	444	250	600	0.00628931	1
3.5	377	250	600	1	1	0.00628931		3							3.5	377	250	600	0.00628931	1
3.5	395	250	600	1	1	0.00628931		3							3.5	395	250	600	0.00628931	1
3.5	445	250	600	1	1	0.00628931		3							3.5	445	250	600	0.00628931	1
3.5	497	250	600	1	1	0.00628931		3							3.5	497	250	600	0.00628931	1
3.5	520	250	600	1	1	0.00628931		3							3.5	520	250	600	0.00628931	1
3.58333	345	250	600	1	1	0.00628931		3							3.58333	345	250	600	0.00628931	1
3.58333	362	250	600	1	1	0.00628931		3							3.58333	362	250	600	0.00628931	1
3.58333	380	250	600	1	1	0.00628931		3							3.58333	380	250	600	0.00628931	1
3.58333	395	250	600	1	1	0.00628931		3							3.58333	395	250	600	0.00628931	1
3.58333	402	250	600	1	1	0.00628931		3							3.58333	402	250	600	0.00628931	1
3.75	412	250	600	1	1	0.00628931		3							3.75	412	250	600	0.00628931	1
3.75	413	250	600	1	1	0.00628931		3							3.75	413	250	600	0.00628931	1
3.83333	320	250	600	1	1	0.00833333		4							3.83333	320	250	600	0.00833333	1
3.83333	340	250	600	1	1	0.00833333		4							3.83333	340	250	600	0.00833333	1
3.83333	342	250	600	1	1	0.00833333		4							3.83333	342	250	600	0.00833333	1
3.83333	357	250	600	1	1	0.00833333		4							3.83333	357	250	600	0.00833333	1
3.83333	360	250	600	1	1	0.00833333		4							3.83333	360	250	600	0.00833333	1
3.83333	375	250	600	1	1	0.00833333		4							3.83333	375	250	600	0.00833333	1
3.83333	385	250	600	1	1	0.00833333		4							3.83333	385	250	600	0.00833333	1
3.83333	402	250	600	1	1	0.00833333		4							3.83333	402	250	600	0.00833333	1
3.83333	410	250	600	1	1	0.00833333		4							3.83333	410	250	600	0.00833333	1
3.83333	415	250	600	1	1	0.00833333		4							3.83333	415	250	600	0.00833333	1
3.83333	425	250	600	1	1	0.00833333		4							3.83333	425	250	600	0.00833333	1
3.83333	445	250	600	1	1	0.00833333		4							3.83333	445	250	600	0.00833333	1
3.83333	465	250	600	1	1	0.00833333		4							3.83333	465	250	600	0.00833333	1
3.91667	357	250	600	1	1	0.00833333		4							3.91667	357	250	600	0.00833333	1
3.91667	362	250	600	1	1	0.00833333		4							3.91667	362	250	600	0.00833333	1
3.91667	365	250	600	1	1	0.00833333		4							3.91667	365	250	600	0.00833333	1
3.91667	365	250	600	1	1	0.00833333		4							3.91667	365	250	600	0.00833333	1
3.91667	370	250	600	1	1	0.00833333		4							3.91667	370	250	600	0.00833333	1
3.91667	375	250	600	1	1	0.00833333		4							3.91667	375	250	600	0.00833333	1
3.91667	382	250	600	1	1	0.00833333		4							3.91667	382	250	600	0.00833333	1
3.91667	382	250	600	1	1	0.00833333		4							3.91667	382	250	600	0.00833333	1
3.91667	387	250	600	1	1	0.00833333		4							3.91667	387	250	600	0.00833333	1
3.91667	390	250	600	1	1	0.00833333		4							3.91667	390	250	600	0.00833333	1
3.91667	390	250	600	1	1	0.00833333		4							3.91667	390	250	600	0.00833333	1
3.91667	397	250	600	1	1	0.00833333		4							3.91667	397	250	600	0.00833333	1
3.91667	397	250	600	1	1	0.00833333		4							3.91667	397	250	600	0.00833333	1
3.91667	400	250	600	1	1	0.00833333		4							3.91667	400	250	600	0.00833333	1
3.91667	410	250	600	1	1	0.00833333		4							3.91667	410	250	600	0.00833333	1
3.91667	410	250	600	1	1	0.00833333		4							3.91667	410	250	600	0.00833333	1
3.91667	410	250	600	1	1	0.00833333		4							3.91667	410	250	600	0.00833333	1
3.91667	412	250	600	1	1	0.00833333		4							3.91667	412	250	600	0.00833333	1
3.91667	412	250	600	1	1	0.00833333		4							3.91667	412	250	600	0.00833333	1
3.91667	415	250	600	1	1	0.00833333		4							3.91667	415	250	600	0.00833333	1
3.91667	417	250	600	1	1	0.00833333		4							3.91667	417	250	600	0.00833333	1
3.91667	420	250	600	1	1	0.00833333		4							3.91667	420	250	600	0.00833333	1
3.91667	420	250	600	1	1	0.00833333		4							3.91667	420	250	600	0.00833333	1
3.91667	423	250	600	1	1	0.00833333		4							3.91667	423	250	600	0.00833333	1
3.91667	425	250	600	1	1	0.00833333		4							3.91667	425	250	600	0.00833333	1
3.91667	427	250	600	1	1	0.00833333		4							3.91667	427	250	600	0.00833333	1
3.91667	430	250	600	1	1	0.00833333		4							3.91667	430	250	600	0.00833333	1
3.91667	430	250	600	1	1	0.00833333		4							3.91667	430	250	600	0.00833333	1
3.91667	432	250	600	1	1	0.00833333		4							3.91667	432	250	600	0.00833333	1
3.91667	435	250	600	1	1	0.00833333		4							3.91667	435	250	600	0.00833333	1
3.91667	440	250	600	1	1	0.00833333		4							3.91667	440	250	600	0.00833333	1
3.91667	440	250	600	1	1	0.00833333		4							3.91667	440	250	600	0.00833333	1
3.91667	445	250	600	1	1	0.00833333		4							3.91667	445	250	600	0.00833333	1
3.91667	445	250	600	1	1	0.00833333		4							3.91667	445	250	600	0.00833333	1
3.91667	445	250	600	1	1	0.00833333		4							3.91667	445	250	600	0.00833333	1
3.91667	452	250	600	1	1	0.00833333		4							3.91667	452	250	600	0.00833333	1
3.91667	455	250	600	1	1	0.00833333		4							3.91667	455	250	600	0.00833333	1
3.91667	457	250	600	1	1	0.00833333		4							3.91667	457	250	600	0.00833333	1
3.91667	465	250	600	1	1	0.00833333		4							3.91667	465	250	600	0.00833333	1
3.91667	470	250	600	1	1	0.00833333		4							3.91667	470	250	600	0.00833333	1
3.91667	475	250	600	1	1	0.00833333		4							3.91667	475	250	600	0.00833333	1
3.91667	475	250	600	1	1	0.00833333		4							3.91667	475	250	600	0.00833333	1
3.91667	485	250	600	1	1	0.00833333		4							3.91667	485	250	600	0.00833333	1
3.91667	512	250	600	1	1	0.00833333		4							3.91667	512	250	600	0.00833333	1
4	330.326	250	600	1	1	0.00833333		4							4	330.326	250	600	0.00833333	1
4	352	250	600	1	1	0.00833333		4							4	352	250	600	0.00833333	1
4	353	250	600	1	1	0.00833333		4							4	353	250	600	0.00833333	1
4	365	250	600	1	1	0.00833333		4							4	365	250	600	0.00833333	1
4	375	250	600	1	1	0.00833333		4							4	375	250	600	0.00833333	1
4	382.886	250	600	1	1	0.00833333		4							4	382.886	250	600	0.00833333	1
4	392	250	600	1	1	0.00833333		4							4	392	250	600	0.00833333	1
4	392	250	600	1	1	0.00833333		4							4	392	250	600	0.00833333	1
4	396	250	600	1	1	0.00833333		4							4	396	250	600	0.00833333	1
4	397	250	600	1	1	0.00833333		4							4	397	250	600	0.00833333	1
4	409	250	600	1	1	0.00833333		4							4	409	250	600	0.00833333	1
4	410	250	600	1	1	0.00833333		4							4	410	250	600	0.00833333	1
4	415	250	600	1	1	0.00833333		4							4	415	250	600	0.00833333	1
4	420	250	600	1	1	0.00833333		4							4	420	250	600	0.00833333	1
4	447	250	600	1	1	0.00833333		4							4	447	250	600	0.00833333	1
4	455	250	600	1	1	0.00833333		4							4	455	250	600	0.00833333	1
4	460	250	600	1	1	0.00833333		4							4	460	250	600	0.00833333	1
4	465	250	600	1	1	0.00833333		4							4	465	250	600	0.00833333	1
4	472	250	600	1	1	0.00833333		4							4	472	250	600	0.00833333	1
4.08333	350	250	600	1	1	0.00833333		4							4.08333	350	250	600	0.00833333	1
4.08333	399	250	600	1	1	0.00833333		4							4.08333	399	250	600	0.00833333	1
4.08333	420	250	600	1	1	0.00833333		4							4.08333	420	250	600	0.00833333	1
4.08333	450	250	600	1	1	0.00833333		4							4.08333	450	250	600	0.00833333	1
4.08333	455	250	600	1	1	0.00833333		4							4.08333	455	250	600	0.00833333	1
4.08333	475	250	600	1	1	0.00833333		4							4.08333	475	250	600	0.00833333	1
4.08333	490	250	600	1	1	0.00833333		4							4.08333	490	250	600	0.00833333	1
4.08333	535	250	600	1	1	0.00833333		4							4.08333	535	250	600	0.00833333	1
4.16667	395	250	600	1	1	0.00833333		4							4.16667	395	250	600	0.00833333	1
4.16667	405	250	600	1	1	0.00833333		4							4.16667	405	250	600	0.00833333	1
4.16667	410	250	600	1	1	0.00833333		4							4.16667	410	250	600	0.00833333	1
4.16667	420	250	600	1	1	0.00833333		4							4.16667	420	250	600	0.00833333	1
4.16667	420	250	600	1	1	0.00833333		4							4.16667	420	250	600	0.00833333	1
4.16667	423.401	250	600	1	1	0.00833333		4							4.16667	423.401	250	600	0.00833333	1
4.16667	445	250	600	1	1	0.00833333		4							4.16667	445	250	600	0.00833333	1
4.16667	450	250	600	1	1	0.00833333		4							4.16667	450	250	600	0.00833333	1
4.16667	467.201	250	600	1	1	0.00833333		4							4.16667	467.201	250	600	0.00833333	1
4.16667	470	250	600	1	1	0.00833333		4							4.16667	470	250	600	0.00833333	1
4.25	375	250	600	1	1	0.00833333		4							4.25	375	250	600	0.00833333	1
4.25	415	250	600	1	1	0.00833333		4							4.25	415	250	600	0.00833333	1
4.25	420	250	600	1	1	0.00833333		4							4.25	420	250	600	0.00833333	1
4.25	455	250	600	1	1	0.00833333		4							4.25	455	250	600	0.00833333	1
4.33333	375	250	600	1	1	0.00833333		4							4.33333	375	250	600	0.00833333	1
4.33333	472	250	600	1	1	0.00833333		4							4.33333	472	250	600	0.00833333	1
4.41667	280	250	600	1	1	0.00833333		4							4.41667	280	250	600	0.00833333	1
4.41667	375	250	600	1	1	0.00833333		4							4.41667	375	250	600	0.00833333	1
4.41667	422	250	600	1	1	0.00833333		4							4.41667	422	250	600	0.00833333	1
4.41667	430	250	600	1	1	0.00833333		4							4.41667	430	250	600	0.00833333	1
4.41667	450	250	600	1	1	0.00833333		4							4.41667	450	250	600	0.00833333	1
4.41667	457	250	600	1	1	0.00833333		4							4.41667	457	250	600	0.00833333	1
4.41667	472	250	600	1	1	0.00833333		4							4.41667	472	250	600	0.00833333	1
4.41667	475	250	600	1	1	0.00833333		4							4.41667	475	250	600	0.00833333	1
4.5	407	250	600	1	1	0.00833333		4							4.5	407	250	600	0.00833333	1
4.5	440	250	600	1	1	0.00833333		4							4.5	440	250	600	0.00833333	1
4.5	445	250	600	1	1	0.00833333		4							4.5	445	250	600	0.00833333	1
4.5	453	250	600	1	1	0.00833333		4							4.5	453	250	600	0.00833333	1
4.5	457	250	600	1	1	0.00833333		4							4.5	457	250	600	0.00833333	1
4.58333	440	250	600	1	1	0.00833333		4							4.58333	440	250	600	0.00833333	1
4.66667	397	250	600	1	1	0.00833333		4							4.66667	397	250	600	0.00833333	1
4.66667	445	250	600	1	1	0.00833333		4							4.66667	445	250	600	0.00833333	1
4.75	395	250	600	1	1	0.00833333		4							4.75	395	250	600	0.00833333	1
4.75	415	250	600	1	1	0.00833333		4							4.75	415	250	600	0.00833333	1
4.75	431	250	600	1	1	0.00833333		4							4.75	431	250	600	0.00833333	1
4.75	452	250	600	1	1	0.00833333		4							4.75	452	250	600	0.00833333	1
4.83333	380	250	600	1	2	0.0217391		5							4.83333	380	250	600	0.0217391	2
4.83333	382	250	600	1	2	0.0217391		5							4.83333	382	250	600	0.0217391	2
4.83333	395	250	600	1	2	0.0217391		5							4.83333	395	250	600	0.0217391	2
4.83333	407	250	600	1	2	0.0217391		5							4.83333	407	250	600	0.0217391	2
4.83333	422	250	600	1	2	0.0217391		5							4.83333	422	250	600	0.0217391	2
4.83333	445	250	600	1	2	0.0217391		5							4.83333	445	250	600	0.0217391	2
4.83333	452	250	600	1	2	0.0217391		5							4.83333	452	250	600	0.0217391	2
4.83333	600	250	600	1	2	0.0217391		5							4.83333	600	250	600	0.0217391	2
4.91667	387	250	600	1	2	0.0217391		5							4.91667	387	250	600	0.0217391	2
4.91667	449	250	600	1	2	0.0217391		5							4.91667	449	250	600	0.0217391	2
4.91667	450	250	600	1	2	0.0217391		5							4.91667	450	250	600	0.0217391	2
4.91667	455	250	600	1	2	0.0217391		5							4.91667	455	250	600	0.0217391	2
4.91667	460	250	600	1	2	0.0217391		5							4.91667	460	250	600	0.0217391	2
4.91667	480	250	600	1	2	0.0217391		5							4.91667	480	250	600	0.0217391	2
4.91667	520	250	600	1	2	0.0217391		5							4.91667	520	250	600	0.0217391	2
4.91667	522	250	600	1	2	0.0217391		5							4.91667	522	250	600	0.0217391	2
5	360	250	600	1	2	0.0217391		5							5	360	250	600	0.0217391	2
5	411	250	600	1	2	0.0217391		5							5	411	250	600	0.0217391	2
5	480	250	600	1	2	0.0217391		5							5	480	250	600	0.0217391	2
5.08333	392	250	600	1	2	0.0217391		5							5.08333	392	250	600	0.0217391	2
5.08333	407	250	600	1	2	0.0217391		5							5.08333	407	250	600	0.0217391	2
5.08333	435	250	600	1	2	0.0217391		5							5.08333	435	250	600	0.0217391	2
5.08333	435	250	600	1	2	0.0217391		5							5.08333	435	250	600	0.0217391	2
5.08333	480	250	600	1	2	0.0217391		5							5.08333	480	250	600	0.0217391	2
5.08333	480	250	600	1	2	0.0217391		5							5.08333	480	250	600	0.0217391	2
5.08333	500	250	600	1	2	0.0217391		5							5.08333	500	250	600	0.0217391	2
5.08333	520	250	600	1	2	0.0217391		5							5.08333	520	250	600	0.0217391	2
5.08333	532	250	600	1	2	0.0217391		5							5.08333	532	250	600	0.0217391	2
5.08333	545	250	600	1	2	0.0217391		5							5.08333	545	250	600	0.0217391	2
5.16667	390	250	600	1	2	0.0217391		5							5.16667	390	250	600	0.0217391	2
5.16667	393	250	600	1	2	0.0217391		5							5.16667	393	250	600	0.0217391	2
5.16667	420	250	600	1	2	0.0217391		5							5.16667	420	250	600	0.0217391	2
5.16667	435	250	600	1	2	0.0217391		5							5.16667	435	250	600	0.0217391	2
5.16667	440	250	600	1	2	0.0217391		5							5.16667	440	250	600	0.0217391	2
5.16667	455.156	250	600	1	2	0.0217391		5							5.16667	455.156	250	600	0.0217391	2
5.16667	462	250	600	1	2	0.0217391		5							5.16667	462	250	600	0.0217391	2
5.16667	475	250	600	1	2	0.0217391		5							5.16667	475	250	600	0.0217391	2
5.16667	480	250	600	1	2	0.0217391		5							5.16667	480	250	600	0.0217391	2
5.16667	502	250	600	1	2	0.0217391		5							5.16667	502	250	600	0.0217391	2
5.16667	542	250	600	1	2	0.0217391		5							5.16667	542	250	600	0.0217391	2
5.25	382	250	600	1	2	0.0217391		5							5.25	382	250	600	0.0217391	2
5.25	507	250	600	1	2	0.0217391		5							5.25	507	250	600	0.0217391	2
5.5	485	250	600	1	2	0.0217391		5							5.5	485	250	600	0.0217391	2
5.5	525	250	600	1	2	0.0217391		5							5.5	525	250	600	0.0217391	2
5.66667	405	250	600	1	2	0.0217391		5							5.66667	405	250	600	0.0217391	2
5.75	329.231	250	600	1	2	0.0217391		5							5.75	329.231	250	600	0.0217391	2
5.83333	380	250	600	1	2	0.0384615		6							5.83333	380	250	600	0.0384615	2
5.83333	440	250	600	1	2	0.0384615		6							5.83333	440	250	600	0.0384615	2
5.83333	445	250	600	1	2	0.0384615		6							5.83333	445	250	600	0.0384615	2
5.83333	470	250	600	1	2	0.0384615		6							5.83333	470	250	600	0.0384615	2
5.83333	497	250	600	1	2	0.0384615		6							5.83333	497	250	600	0.0384615	2
5.91667	462	250	600	1	2	0.0384615		6							5.91667	462	250	600	0.0384615	2
5.91667	490	250	600	1	2	0.0384615		6							5.91667	490	250	600	0.0384615	2
5.91667	515	250	600	1	2	0.0384615		6							5.91667	515	250	600	0.0384615	2
6	456	250	600	1	2	0.0384615		6							6	456	250	600	0.0384615	2
6.08333	432	250	600	1	2	0.0384615		6							6.08333	432	250	600	0.0384615	2
6.08333	485	250	600	1	2	0.0384615		6							6.08333	485	250	600	0.0384615	2
6.08333	485	250	600	1	2	0.0384615		6							6.08333	485	250	600	0.0384615	2
6.08333	490	250	600	1	2	0.0384615		6							6.08333	490	250	600	0.0384615	2
6.08333	610	250	600	1	2	0.0384615		6							6.08333	610	250	600	0.0384615	2
6.16667	467	250	600	1	2	0.0384615		6							6.16667	467	250	600	0.0384615	2
6.16667	552	250	600	1	2	0.0384615		6							6.16667	552	250	600	0.0384615	2
6.25	480	250	600	1	2	0.0384615		6							6.25	480	250	600	0.0384615	2
6.25	485	250	600	1	2	0.0384615		6							6.25	485	250	600	0.0384615	2
6.25	510	250	600	1	2	0.0384615		6							6.25	510	250	600	0.0384615	2
6.5	420	250	600	1	2	0.0384615		6							6.5	420	250	600	0.0384615	2
6.5	513	250	600	1	2	0.0384615		6							6.5	513	250	600	0.0384615	2
6.5	540	250	600	1	2	0.0384615		6							6.5	540	250	600	0.0384615	2
6.5	586	250	600	1	2	0.0384615		6							6.5	586	250	600	0.0384615	2
6.5	599	250	600	1	2	0.0384615		6							6.5	599	250	600	0.0384615	2
6.75	445	250	600	1	2	0.0384615		6							6.75	445	250	600	0.0384615	2
6.75	527	250	600	1	2	0.0384615		6							6.75	527	250	600	0.0384615	2
6.83333	585	250	600	1	2	0.0555556		7							6.83333	585	250	600	0.0555556	2
6.83333	625	250	600	1	2	0.0555556		7							6.83333	625	250	600	0.0555556	2
6.91667	445	250	600	1	2	0.0555556		7							6.91667	445	250	600	0.0555556	2
7	410	250	600	1	2	0.0555556		7							7	410	250	600	0.0555556	2
7	605	250	600	1	2	0.0555556		7							7	605	250	600	0.0555556	2
7.08333	522	250	600	1	2	0.0555556		7							7.08333	522	250	600	0.0555556	2
7.08333	535	250	600	1	2	0.0555556		7							7.08333	535	250	600	0.0555556	2
7.08333	560	250	600	1	2	0.0555556		7							7.08333	560	250	600	0.0555556	2
7.16667	461	250	600	1	2	0.0555556		7							7.16667	461	250	600	0.0555556	2
7.16667	510	250	600	1	2	0.0555556		7							7.16667	510	250	600	0.0555556	2
7.16667	565	250	600	1	2	0.0555556		7							7.16667	565	250	600	0.0555556	2
7.16667	590	250	600	1	2	0.0555556		7							7.16667	590	250	600	0.0555556	2
7.25	440	250	600	1	2	0.0555556		7							7.25	440	250	600	0.0555556	2
7.33333	332	250	600	1	2	0.0555556		7							7.33333	332	250	600	0.0555556	2
7.33333	467	250	600	1	2	0.0555556		7							7.33333	467	250	600	0.0555556	2
7.5	565	250	600	1	2	0.0555556		7							7.5	565	250	600	0.0555556	2
7.5	640	250	600	1	2	0.0555556		7							7.5	640	250	600	0.0555556	2
7.75	445	250	600	1	2	0.0555556		7							7.75	445	250	600	0.0555556	2
8.16667	497	250	600	1	2	0.125		8							8.16667	497	250	600	0.125	2
8.16667	520	250	600	1	2	0.125		8							8.16667	520	250	600	0.125	2
8.25	625	250	600	1	2	0.125		8							8.25	625	250	600	0.125	2
8.33333	539	250	600	1	2	0.125		8							8.33333	539	250	600	0.125	2
8.41667	632	250	600	1	2	0.125		8							8.41667	632	250	600	0.125	2
8.5	470	250	600	1	2	0.125		8							8.5	470	250	600	0.125	2
8.5	480	250	600	1	2	0.125		8							8.5	480	250	600	0.125	2
8.5	596	250	600	1	2	0.125		8							8.5	596	250	600	0.125	2
9.25	475	250	600	1	2	0.5		9							9.25	475	250	600	0.5	2
9.25	570	250	600	1	2	0.5		9							9.25	570	250	600	0.5	2
12	680	250	600	1	2	0.5		12							12	680	250	600	0.5	2
12.25	670	250	600	1	2	0.5		12							12.25	670	250	600	0.5	2
13.1667	680	250	600	1	2	1		13							13.1667	680	250	600	1	2

## Sheet: growth_min250
Frac_age	TL_mm	min_size	weight		Frac_age	TL_mm	min_size	inv_wgt		Cal_age	bin	Bin	Frequency	inv
1.41667	297	250	1		1.41667	297	250	0.0555556		1	1	1	18	0.0555556
1.41667	332	250	1		1.41667	332	250	0.0555556		1	2	2	234	0.0042735
1.5	284.336	250	1		1.5	284.336	250	0.0555556		1	3	3	159	0.00628931
1.58333	255	250	1		1.58333	255	250	0.0555556		1	4	4	120	0.00833333
1.58333	270	250	1		1.58333	270	250	0.0555556		1	5	5	46	0.0217391
1.58333	322	250	1		1.58333	322	250	0.0555556		1	6	6	26	0.0384615
1.58333	375	250	1		1.58333	375	250	0.0555556		1	7	7	18	0.0555556
1.66667	250	250	1		1.66667	250	250	0.0555556		1	8	8	8	0.125
1.66667	275	250	1		1.66667	275	250	0.0555556		1	9	9	2	0.5
1.66667	280	250	1		1.66667	280	250	0.0555556		1	10	10	0	#DIV/0!
1.66667	282	250	1		1.66667	282	250	0.0555556		1	11	11	0	#DIV/0!
1.66667	290	250	1		1.66667	290	250	0.0555556		1	12	12	2	0.5
1.66667	297	250	1		1.66667	297	250	0.0555556		1	13	13	1	1
1.66667	305	250	1		1.66667	305	250	0.0555556		1		More	0
1.66667	310	250	1		1.66667	310	250	0.0555556		1
1.75	290	250	1		1.75	290	250	0.0555556		1
1.75	332	250	1		1.75	332	250	0.0555556		1
1.75	349	250	1		1.75	349	250	0.0555556		1
1.83333	286	250	1		1.83333	286	250	0.0042735		2
1.83333	289	250	1		1.83333	289	250	0.0042735		2
1.83333	295	250	1		1.83333	295	250	0.0042735		2
1.83333	300	250	1		1.83333	300	250	0.0042735		2
1.83333	302	250	1		1.83333	302	250	0.0042735		2
1.83333	305	250	1		1.83333	305	250	0.0042735		2
1.83333	320	250	1		1.83333	320	250	0.0042735		2
1.83333	337	250	1		1.83333	337	250	0.0042735		2
1.91667	260	250	1		1.91667	260	250	0.0042735		2
1.91667	272	250	1		1.91667	272	250	0.0042735		2
1.91667	278	250	1		1.91667	278	250	0.0042735		2
1.91667	280	250	1		1.91667	280	250	0.0042735		2
1.91667	285	250	1		1.91667	285	250	0.0042735		2
1.91667	289	250	1		1.91667	289	250	0.0042735		2
1.91667	290	250	1		1.91667	290	250	0.0042735		2
1.91667	297	250	1		1.91667	297	250	0.0042735		2
1.91667	302	250	1		1.91667	302	250	0.0042735		2
1.91667	304	250	1		1.91667	304	250	0.0042735		2
1.91667	309	250	1		1.91667	309	250	0.0042735		2
1.91667	310	250	1		1.91667	310	250	0.0042735		2
1.91667	315	250	1		1.91667	315	250	0.0042735		2
1.91667	316	250	1		1.91667	316	250	0.0042735		2
1.91667	317	250	1		1.91667	317	250	0.0042735		2
1.91667	317	250	1		1.91667	317	250	0.0042735		2
1.91667	320	250	1		1.91667	320	250	0.0042735		2
1.91667	320	250	1		1.91667	320	250	0.0042735		2
1.91667	321	250	1		1.91667	321	250	0.0042735		2
1.91667	325	250	1		1.91667	325	250	0.0042735		2
1.91667	325	250	1		1.91667	325	250	0.0042735		2
1.91667	325	250	1		1.91667	325	250	0.0042735		2
1.91667	330	250	1		1.91667	330	250	0.0042735		2
1.91667	347	250	1		1.91667	347	250	0.0042735		2
2	256	250	1		2	256	250	0.0042735		2
2	284	250	1		2	284	250	0.0042735		2
2	284.336	250	1		2	284.336	250	0.0042735		2
2	288.716	250	1		2	288.716	250	0.0042735		2
2	289.811	250	1		2	289.811	250	0.0042735		2
2	290	250	1		2	290	250	0.0042735		2
2	292	250	1		2	292	250	0.0042735		2
2	292.001	250	1		2	292.001	250	0.0042735		2
2	292.001	250	1		2	292.001	250	0.0042735		2
2	293	250	1		2	293	250	0.0042735		2
2	294.191	250	1		2	294.191	250	0.0042735		2
2	295.286	250	1		2	295.286	250	0.0042735		2
2	295.286	250	1		2	295.286	250	0.0042735		2
2	299	250	1		2	299	250	0.0042735		2
2	299.666	250	1		2	299.666	250	0.0042735		2
2	300.761	250	1		2	300.761	250	0.0042735		2
2	300.761	250	1		2	300.761	250	0.0042735		2
2	301	250	1		2	301	250	0.0042735		2
2	301.856	250	1		2	301.856	250	0.0042735		2
2	301.856	250	1		2	301.856	250	0.0042735		2
2	304.046	250	1		2	304.046	250	0.0042735		2
2	305	250	1		2	305	250	0.0042735		2
2	305.141	250	1		2	305.141	250	0.0042735		2
2	305.141	250	1		2	305.141	250	0.0042735		2
2	306	250	1		2	306	250	0.0042735		2
2	306.236	250	1		2	306.236	250	0.0042735		2
2	307.331	250	1		2	307.331	250	0.0042735		2
2	308.426	250	1		2	308.426	250	0.0042735		2
2	309	250	1		2	309	250	0.0042735		2
2	310	250	1		2	310	250	0.0042735		2
2	310	250	1		2	310	250	0.0042735		2
2	310.616	250	1		2	310.616	250	0.0042735		2
2	310.616	250	1		2	310.616	250	0.0042735		2
2	312.806	250	1		2	312.806	250	0.0042735		2
2	313	250	1		2	313	250	0.0042735		2
2	313.901	250	1		2	313.901	250	0.0042735		2
2	314.996	250	1		2	314.996	250	0.0042735		2
2	315	250	1		2	315	250	0.0042735		2
2	317	250	1		2	317	250	0.0042735		2
2	317.186	250	1		2	317.186	250	0.0042735		2
2	318.281	250	1		2	318.281	250	0.0042735		2
2	320	250	1		2	320	250	0.0042735		2
2	320.471	250	1		2	320.471	250	0.0042735		2
2	320.471	250	1		2	320.471	250	0.0042735		2
2	321.566	250	1		2	321.566	250	0.0042735		2
2	322.661	250	1		2	322.661	250	0.0042735		2
2	322.661	250	1		2	322.661	250	0.0042735		2
2	325	250	1		2	325	250	0.0042735		2
2	328.136	250	1		2	328.136	250	0.0042735		2
2	330	250	1		2	330	250	0.0042735		2
2	332	250	1		2	332	250	0.0042735		2
2	332.516	250	1		2	332.516	250	0.0042735		2
2	335	250	1		2	335	250	0.0042735		2
2	335.801	250	1		2	335.801	250	0.0042735		2
2	336.896	250	1		2	336.896	250	0.0042735		2
2	341.276	250	1		2	341.276	250	0.0042735		2
2	342	250	1		2	342	250	0.0042735		2
2	347	250	1		2	347	250	0.0042735		2
2.08333	282	250	1		2.08333	282	250	0.0042735		2
2.08333	287	250	1		2.08333	287	250	0.0042735		2
2.08333	290	250	1		2.08333	290	250	0.0042735		2
2.08333	299	250	1		2.08333	299	250	0.0042735		2
2.08333	302	250	1		2.08333	302	250	0.0042735		2
2.08333	302	250	1		2.08333	302	250	0.0042735		2
2.08333	305	250	1		2.08333	305	250	0.0042735		2
2.08333	305	250	1		2.08333	305	250	0.0042735		2
2.08333	305	250	1		2.08333	305	250	0.0042735		2
2.08333	305	250	1		2.08333	305	250	0.0042735		2
2.08333	305	250	1		2.08333	305	250	0.0042735		2
2.08333	307	250	1		2.08333	307	250	0.0042735		2
2.08333	310	250	1		2.08333	310	250	0.0042735		2
2.08333	310	250	1		2.08333	310	250	0.0042735		2
2.08333	315	250	1		2.08333	315	250	0.0042735		2
2.08333	320	250	1		2.08333	320	250	0.0042735		2
2.08333	320	250	1		2.08333	320	250	0.0042735		2
2.08333	320	250	1		2.08333	320	250	0.0042735		2
2.08333	325	250	1		2.08333	325	250	0.0042735		2
2.08333	325	250	1		2.08333	325	250	0.0042735		2
2.08333	331	250	1		2.08333	331	250	0.0042735		2
2.08333	332	250	1		2.08333	332	250	0.0042735		2
2.08333	337	250	1		2.08333	337	250	0.0042735		2
2.16667	252	250	1		2.16667	252	250	0.0042735		2
2.16667	287	250	1		2.16667	287	250	0.0042735		2
2.16667	290	250	1		2.16667	290	250	0.0042735		2
2.16667	294.191	250	1		2.16667	294.191	250	0.0042735		2
2.16667	301	250	1		2.16667	301	250	0.0042735		2
2.16667	304	250	1		2.16667	304	250	0.0042735		2
2.16667	304	250	1		2.16667	304	250	0.0042735		2
2.16667	305	250	1		2.16667	305	250	0.0042735		2
2.16667	308.426	250	1		2.16667	308.426	250	0.0042735		2
2.16667	308.426	250	1		2.16667	308.426	250	0.0042735		2
2.16667	310	250	1		2.16667	310	250	0.0042735		2
2.16667	310.616	250	1		2.16667	310.616	250	0.0042735		2
2.16667	313	250	1		2.16667	313	250	0.0042735		2
2.16667	317	250	1		2.16667	317	250	0.0042735		2
2.16667	317	250	1		2.16667	317	250	0.0042735		2
2.16667	317	250	1		2.16667	317	250	0.0042735		2
2.16667	327	250	1		2.16667	327	250	0.0042735		2
2.16667	327	250	1		2.16667	327	250	0.0042735		2
2.16667	337	250	1		2.16667	337	250	0.0042735		2
2.16667	340	250	1		2.16667	340	250	0.0042735		2
2.16667	351	250	1		2.16667	351	250	0.0042735		2
2.16667	352	250	1		2.16667	352	250	0.0042735		2
2.16667	359.891	250	1		2.16667	359.891	250	0.0042735		2
2.16667	364.271	250	1		2.16667	364.271	250	0.0042735		2
2.16667	365.366	250	1		2.16667	365.366	250	0.0042735		2
2.16667	373.031	250	1		2.16667	373.031	250	0.0042735		2
2.16667	382	250	1		2.16667	382	250	0.0042735		2
2.25	292	250	1		2.25	292	250	0.0042735		2
2.25	295	250	1		2.25	295	250	0.0042735		2
2.25	295	250	1		2.25	295	250	0.0042735		2
2.25	304	250	1		2.25	304	250	0.0042735		2
2.25	304	250	1		2.25	304	250	0.0042735		2
2.25	305	250	1		2.25	305	250	0.0042735		2
2.25	305	250	1		2.25	305	250	0.0042735		2
2.25	305	250	1		2.25	305	250	0.0042735		2
2.25	312	250	1		2.25	312	250	0.0042735		2
2.25	323	250	1		2.25	323	250	0.0042735		2
2.25	325	250	1		2.25	325	250	0.0042735		2
2.25	325	250	1		2.25	325	250	0.0042735		2
2.25	325	250	1		2.25	325	250	0.0042735		2
2.25	328	250	1		2.25	328	250	0.0042735		2
2.25	337	250	1		2.25	337	250	0.0042735		2
2.25	340	250	1		2.25	340	250	0.0042735		2
2.25	345	250	1		2.25	345	250	0.0042735		2
2.25	346	250	1		2.25	346	250	0.0042735		2
2.33333	303	250	1		2.33333	303	250	0.0042735		2
2.33333	313	250	1		2.33333	313	250	0.0042735		2
2.33333	316	250	1		2.33333	316	250	0.0042735		2
2.33333	317	250	1		2.33333	317	250	0.0042735		2
2.33333	317	250	1		2.33333	317	250	0.0042735		2
2.33333	322	250	1		2.33333	322	250	0.0042735		2
2.33333	324	250	1		2.33333	324	250	0.0042735		2
2.33333	327	250	1		2.33333	327	250	0.0042735		2
2.33333	342	250	1		2.33333	342	250	0.0042735		2
2.33333	342	250	1		2.33333	342	250	0.0042735		2
2.33333	344	250	1		2.33333	344	250	0.0042735		2
2.33333	348	250	1		2.33333	348	250	0.0042735		2
2.33333	365	250	1		2.33333	365	250	0.0042735		2
2.33333	405	250	1		2.33333	405	250	0.0042735		2
2.41667	295	250	1		2.41667	295	250	0.0042735		2
2.41667	295	250	1		2.41667	295	250	0.0042735		2
2.41667	295	250	1		2.41667	295	250	0.0042735		2
2.41667	306	250	1		2.41667	306	250	0.0042735		2
2.41667	309.521	250	1		2.41667	309.521	250	0.0042735		2
2.41667	311	250	1		2.41667	311	250	0.0042735		2
2.41667	311	250	1		2.41667	311	250	0.0042735		2
2.41667	314	250	1		2.41667	314	250	0.0042735		2
2.41667	315	250	1		2.41667	315	250	0.0042735		2
2.41667	316	250	1		2.41667	316	250	0.0042735		2
2.41667	317	250	1		2.41667	317	250	0.0042735		2
2.41667	327	250	1		2.41667	327	250	0.0042735		2
2.41667	330	250	1		2.41667	330	250	0.0042735		2
2.41667	330	250	1		2.41667	330	250	0.0042735		2
2.41667	332	250	1		2.41667	332	250	0.0042735		2
2.41667	333.611	250	1		2.41667	333.611	250	0.0042735		2
2.41667	341	250	1		2.41667	341	250	0.0042735		2
2.41667	347	250	1		2.41667	347	250	0.0042735		2
2.41667	347	250	1		2.41667	347	250	0.0042735		2
2.41667	355	250	1		2.41667	355	250	0.0042735		2
2.41667	356	250	1		2.41667	356	250	0.0042735		2
2.41667	371	250	1		2.41667	371	250	0.0042735		2
2.41667	380	250	1		2.41667	380	250	0.0042735		2
2.5	291	250	1		2.5	291	250	0.0042735		2
2.5	311.711	250	1		2.5	311.711	250	0.0042735		2
2.5	324.851	250	1		2.5	324.851	250	0.0042735		2
2.5	326	250	1		2.5	326	250	0.0042735		2
2.5	332	250	1		2.5	332	250	0.0042735		2
2.5	336.896	250	1		2.5	336.896	250	0.0042735		2
2.5	338	250	1		2.5	338	250	0.0042735		2
2.5	340	250	1		2.5	340	250	0.0042735		2
2.5	344.561	250	1		2.5	344.561	250	0.0042735		2
2.5	349	250	1		2.5	349	250	0.0042735		2
2.5	353.321	250	1		2.5	353.321	250	0.0042735		2
2.5	354	250	1		2.5	354	250	0.0042735		2
2.5	365	250	1		2.5	365	250	0.0042735		2
2.58333	325	250	1		2.58333	325	250	0.0042735		2
2.58333	325	250	1		2.58333	325	250	0.0042735		2
2.58333	330	250	1		2.58333	330	250	0.0042735		2
2.58333	339	250	1		2.58333	339	250	0.0042735		2
2.58333	352	250	1		2.58333	352	250	0.0042735		2
2.58333	355	250	1		2.58333	355	250	0.0042735		2
2.58333	377	250	1		2.58333	377	250	0.0042735		2
2.66667	322	250	1		2.66667	322	250	0.0042735		2
2.66667	330	250	1		2.66667	330	250	0.0042735		2
2.66667	345	250	1		2.66667	345	250	0.0042735		2
2.66667	345	250	1		2.66667	345	250	0.0042735		2
2.66667	355	250	1		2.66667	355	250	0.0042735		2
2.66667	365	250	1		2.66667	365	250	0.0042735		2
2.66667	385	250	1		2.66667	385	250	0.0042735		2
2.75	283	250	1		2.75	283	250	0.0042735		2
2.75	310	250	1		2.75	310	250	0.0042735		2
2.75	323	250	1		2.75	323	250	0.0042735		2
2.75	329	250	1		2.75	329	250	0.0042735		2
2.75	335	250	1		2.75	335	250	0.0042735		2
2.75	345	250	1		2.75	345	250	0.0042735		2
2.75	345	250	1		2.75	345	250	0.0042735		2
2.75	347	250	1		2.75	347	250	0.0042735		2
2.75	347	250	1		2.75	347	250	0.0042735		2
2.75	367	250	1		2.75	367	250	0.0042735		2
2.75	375	250	1		2.75	375	250	0.0042735		2
2.75	380	250	1		2.75	380	250	0.0042735		2
2.83333	300	250	1		2.83333	300	250	0.00628931		3
2.83333	320	250	1		2.83333	320	250	0.00628931		3
2.83333	345	250	1		2.83333	345	250	0.00628931		3
2.83333	345	250	1		2.83333	345	250	0.00628931		3
2.83333	360	250	1		2.83333	360	250	0.00628931		3
2.83333	365	250	1		2.83333	365	250	0.00628931		3
2.83333	365	250	1		2.83333	365	250	0.00628931		3
2.83333	380	250	1		2.83333	380	250	0.00628931		3
2.83333	387	250	1		2.83333	387	250	0.00628931		3
2.83333	395	250	1		2.83333	395	250	0.00628931		3
2.83333	400	250	1		2.83333	400	250	0.00628931		3
2.83333	415	250	1		2.83333	415	250	0.00628931		3
2.91667	312	250	1		2.91667	312	250	0.00628931		3
2.91667	315	250	1		2.91667	315	250	0.00628931		3
2.91667	335	250	1		2.91667	335	250	0.00628931		3
2.91667	342	250	1		2.91667	342	250	0.00628931		3
2.91667	345	250	1		2.91667	345	250	0.00628931		3
2.91667	347	250	1		2.91667	347	250	0.00628931		3
2.91667	347	250	1		2.91667	347	250	0.00628931		3
2.91667	350	250	1		2.91667	350	250	0.00628931		3
2.91667	351	250	1		2.91667	351	250	0.00628931		3
2.91667	352	250	1		2.91667	352	250	0.00628931		3
2.91667	356	250	1		2.91667	356	250	0.00628931		3
2.91667	359	250	1		2.91667	359	250	0.00628931		3
2.91667	360	250	1		2.91667	360	250	0.00628931		3
2.91667	360	250	1		2.91667	360	250	0.00628931		3
2.91667	365	250	1		2.91667	365	250	0.00628931		3
2.91667	370	250	1		2.91667	370	250	0.00628931		3
2.91667	370	250	1		2.91667	370	250	0.00628931		3
2.91667	370	250	1		2.91667	370	250	0.00628931		3
2.91667	370	250	1		2.91667	370	250	0.00628931		3
2.91667	375	250	1		2.91667	375	250	0.00628931		3
2.91667	375	250	1		2.91667	375	250	0.00628931		3
2.91667	377	250	1		2.91667	377	250	0.00628931		3
2.91667	380	250	1		2.91667	380	250	0.00628931		3
2.91667	380	250	1		2.91667	380	250	0.00628931		3
2.91667	385	250	1		2.91667	385	250	0.00628931		3
2.91667	385	250	1		2.91667	385	250	0.00628931		3
2.91667	385	250	1		2.91667	385	250	0.00628931		3
2.91667	387	250	1		2.91667	387	250	0.00628931		3
2.91667	390	250	1		2.91667	390	250	0.00628931		3
2.91667	390	250	1		2.91667	390	250	0.00628931		3
2.91667	391	250	1		2.91667	391	250	0.00628931		3
2.91667	395	250	1		2.91667	395	250	0.00628931		3
2.91667	400	250	1		2.91667	400	250	0.00628931		3
2.91667	402	250	1		2.91667	402	250	0.00628931		3
2.91667	410	250	1		2.91667	410	250	0.00628931		3
2.91667	412	250	1		2.91667	412	250	0.00628931		3
2.91667	415	250	1		2.91667	415	250	0.00628931		3
2.91667	420	250	1		2.91667	420	250	0.00628931		3
2.91667	420	250	1		2.91667	420	250	0.00628931		3
3	284	250	1		3	284	250	0.00628931		3
3	285	250	1		3	285	250	0.00628931		3
3	310	250	1		3	310	250	0.00628931		3
3	316	250	1		3	316	250	0.00628931		3
3	316	250	1		3	316	250	0.00628931		3
3	325	250	1		3	325	250	0.00628931		3
3	330.326	250	1		3	330.326	250	0.00628931		3
3	335	250	1		3	335	250	0.00628931		3
3	340	250	1		3	340	250	0.00628931		3
3	340	250	1		3	340	250	0.00628931		3
3	345.656	250	1		3	345.656	250	0.00628931		3
3	350.036	250	1		3	350.036	250	0.00628931		3
3	351.131	250	1		3	351.131	250	0.00628931		3
3	352	250	1		3	352	250	0.00628931		3
3	353.321	250	1		3	353.321	250	0.00628931		3
3	355	250	1		3	355	250	0.00628931		3
3	355.511	250	1		3	355.511	250	0.00628931		3
3	355.511	250	1		3	355.511	250	0.00628931		3
3	358.796	250	1		3	358.796	250	0.00628931		3
3	360.986	250	1		3	360.986	250	0.00628931		3
3	362.081	250	1		3	362.081	250	0.00628931		3
3	363.176	250	1		3	363.176	250	0.00628931		3
3	364.271	250	1		3	364.271	250	0.00628931		3
3	364.271	250	1		3	364.271	250	0.00628931		3
3	365	250	1		3	365	250	0.00628931		3
3	365	250	1		3	365	250	0.00628931		3
3	366.461	250	1		3	366.461	250	0.00628931		3
3	366.461	250	1		3	366.461	250	0.00628931		3
3	370	250	1		3	370	250	0.00628931		3
3	372	250	1		3	372	250	0.00628931		3
3	375	250	1		3	375	250	0.00628931		3
3	375	250	1		3	375	250	0.00628931		3
3	375	250	1		3	375	250	0.00628931		3
3	375	250	1		3	375	250	0.00628931		3
3	375.221	250	1		3	375.221	250	0.00628931		3
3	377	250	1		3	377	250	0.00628931		3
3	378.506	250	1		3	378.506	250	0.00628931		3
3	382.886	250	1		3	382.886	250	0.00628931		3
3	394.931	250	1		3	394.931	250	0.00628931		3
3	397	250	1		3	397	250	0.00628931		3
3	402	250	1		3	402	250	0.00628931		3
3	420	250	1		3	420	250	0.00628931		3
3.08333	318	250	1		3.08333	318	250	0.00628931		3
3.08333	349	250	1		3.08333	349	250	0.00628931		3
3.08333	350	250	1		3.08333	350	250	0.00628931		3
3.08333	355	250	1		3.08333	355	250	0.00628931		3
3.08333	357	250	1		3.08333	357	250	0.00628931		3
3.08333	362	250	1		3.08333	362	250	0.00628931		3
3.08333	362	250	1		3.08333	362	250	0.00628931		3
3.08333	363	250	1		3.08333	363	250	0.00628931		3
3.08333	375	250	1		3.08333	375	250	0.00628931		3
3.08333	377	250	1		3.08333	377	250	0.00628931		3
3.08333	380	250	1		3.08333	380	250	0.00628931		3
3.08333	380	250	1		3.08333	380	250	0.00628931		3
3.08333	382	250	1		3.08333	382	250	0.00628931		3
3.08333	385	250	1		3.08333	385	250	0.00628931		3
3.08333	385	250	1		3.08333	385	250	0.00628931		3
3.08333	390	250	1		3.08333	390	250	0.00628931		3
3.08333	397	250	1		3.08333	397	250	0.00628931		3
3.08333	430	250	1		3.08333	430	250	0.00628931		3
3.08333	445	250	1		3.08333	445	250	0.00628931		3
3.08333	465	250	1		3.08333	465	250	0.00628931		3
3.08333	469.391	250	1		3.08333	469.391	250	0.00628931		3
3.16667	300.761	250	1		3.16667	300.761	250	0.00628931		3
3.16667	312	250	1		3.16667	312	250	0.00628931		3
3.16667	325.946	250	1		3.16667	325.946	250	0.00628931		3
3.16667	335	250	1		3.16667	335	250	0.00628931		3
3.16667	345	250	1		3.16667	345	250	0.00628931		3
3.16667	357	250	1		3.16667	357	250	0.00628931		3
3.16667	360	250	1		3.16667	360	250	0.00628931		3
3.16667	364.271	250	1		3.16667	364.271	250	0.00628931		3
3.16667	370	250	1		3.16667	370	250	0.00628931		3
3.16667	377	250	1		3.16667	377	250	0.00628931		3
3.16667	382	250	1		3.16667	382	250	0.00628931		3
3.16667	383.981	250	1		3.16667	383.981	250	0.00628931		3
3.16667	400	250	1		3.16667	400	250	0.00628931		3
3.25	315	250	1		3.25	315	250	0.00628931		3
3.25	344	250	1		3.25	344	250	0.00628931		3
3.25	350	250	1		3.25	350	250	0.00628931		3
3.25	355	250	1		3.25	355	250	0.00628931		3
3.25	357	250	1		3.25	357	250	0.00628931		3
3.25	365	250	1		3.25	365	250	0.00628931		3
3.25	366	250	1		3.25	366	250	0.00628931		3
3.25	367	250	1		3.25	367	250	0.00628931		3
3.25	423	250	1		3.25	423	250	0.00628931		3
3.33333	331	250	1		3.33333	331	250	0.00628931		3
3.33333	366	250	1		3.33333	366	250	0.00628931		3
3.33333	370	250	1		3.33333	370	250	0.00628931		3
3.33333	385	250	1		3.33333	385	250	0.00628931		3
3.41667	316	250	1		3.41667	316	250	0.00628931		3
3.41667	320	250	1		3.41667	320	250	0.00628931		3
3.41667	339	250	1		3.41667	339	250	0.00628931		3
3.41667	348	250	1		3.41667	348	250	0.00628931		3
3.41667	385	250	1		3.41667	385	250	0.00628931		3
3.41667	405	250	1		3.41667	405	250	0.00628931		3
3.41667	444	250	1		3.41667	444	250	0.00628931		3
3.5	377	250	1		3.5	377	250	0.00628931		3
3.5	395	250	1		3.5	395	250	0.00628931		3
3.5	445	250	1		3.5	445	250	0.00628931		3
3.5	497	250	1		3.5	497	250	0.00628931		3
3.5	520	250	1		3.5	520	250	0.00628931		3
3.58333	345	250	1		3.58333	345	250	0.00628931		3
3.58333	362	250	1		3.58333	362	250	0.00628931		3
3.58333	380	250	1		3.58333	380	250	0.00628931		3
3.58333	395	250	1		3.58333	395	250	0.00628931		3
3.58333	402	250	1		3.58333	402	250	0.00628931		3
3.75	412	250	1		3.75	412	250	0.00628931		3
3.75	413	250	1		3.75	413	250	0.00628931		3
3.83333	320	250	1		3.83333	320	250	0.00833333		4
3.83333	340	250	1		3.83333	340	250	0.00833333		4
3.83333	342	250	1		3.83333	342	250	0.00833333		4
3.83333	357	250	1		3.83333	357	250	0.00833333		4
3.83333	360	250	1		3.83333	360	250	0.00833333		4
3.83333	375	250	1		3.83333	375	250	0.00833333		4
3.83333	385	250	1		3.83333	385	250	0.00833333		4
3.83333	402	250	1		3.83333	402	250	0.00833333		4
3.83333	410	250	1		3.83333	410	250	0.00833333		4
3.83333	415	250	1		3.83333	415	250	0.00833333		4
3.83333	425	250	1		3.83333	425	250	0.00833333		4
3.83333	445	250	1		3.83333	445	250	0.00833333		4
3.83333	465	250	1		3.83333	465	250	0.00833333		4
3.91667	357	250	1		3.91667	357	250	0.00833333		4
3.91667	362	250	1		3.91667	362	250	0.00833333		4
3.91667	365	250	1		3.91667	365	250	0.00833333		4
3.91667	365	250	1		3.91667	365	250	0.00833333		4
3.91667	370	250	1		3.91667	370	250	0.00833333		4
3.91667	375	250	1		3.91667	375	250	0.00833333		4
3.91667	382	250	1		3.91667	382	250	0.00833333		4
3.91667	382	250	1		3.91667	382	250	0.00833333		4
3.91667	387	250	1		3.91667	387	250	0.00833333		4
3.91667	390	250	1		3.91667	390	250	0.00833333		4
3.91667	390	250	1		3.91667	390	250	0.00833333		4
3.91667	397	250	1		3.91667	397	250	0.00833333		4
3.91667	397	250	1		3.91667	397	250	0.00833333		4
3.91667	400	250	1		3.91667	400	250	0.00833333		4
3.91667	410	250	1		3.91667	410	250	0.00833333		4
3.91667	410	250	1		3.91667	410	250	0.00833333		4
3.91667	410	250	1		3.91667	410	250	0.00833333		4
3.91667	412	250	1		3.91667	412	250	0.00833333		4
3.91667	412	250	1		3.91667	412	250	0.00833333		4
3.91667	415	250	1		3.91667	415	250	0.00833333		4
3.91667	417	250	1		3.91667	417	250	0.00833333		4
3.91667	420	250	1		3.91667	420	250	0.00833333		4
3.91667	420	250	1		3.91667	420	250	0.00833333		4
3.91667	423	250	1		3.91667	423	250	0.00833333		4
3.91667	425	250	1		3.91667	425	250	0.00833333		4
3.91667	427	250	1		3.91667	427	250	0.00833333		4
3.91667	430	250	1		3.91667	430	250	0.00833333		4
3.91667	430	250	1		3.91667	430	250	0.00833333		4
3.91667	432	250	1		3.91667	432	250	0.00833333		4
3.91667	435	250	1		3.91667	435	250	0.00833333		4
3.91667	440	250	1		3.91667	440	250	0.00833333		4
3.91667	440	250	1		3.91667	440	250	0.00833333		4
3.91667	445	250	1		3.91667	445	250	0.00833333		4
3.91667	445	250	1		3.91667	445	250	0.00833333		4
3.91667	445	250	1		3.91667	445	250	0.00833333		4
3.91667	452	250	1		3.91667	452	250	0.00833333		4
3.91667	455	250	1		3.91667	455	250	0.00833333		4
3.91667	457	250	1		3.91667	457	250	0.00833333		4
3.91667	465	250	1		3.91667	465	250	0.00833333		4
3.91667	470	250	1		3.91667	470	250	0.00833333		4
3.91667	475	250	1		3.91667	475	250	0.00833333		4
3.91667	475	250	1		3.91667	475	250	0.00833333		4
3.91667	485	250	1		3.91667	485	250	0.00833333		4
3.91667	512	250	1		3.91667	512	250	0.00833333		4
4	330.326	250	1		4	330.326	250	0.00833333		4
4	352	250	1		4	352	250	0.00833333		4
4	353	250	1		4	353	250	0.00833333		4
4	365	250	1		4	365	250	0.00833333		4
4	375	250	1		4	375	250	0.00833333		4
4	382.886	250	1		4	382.886	250	0.00833333		4
4	392	250	1		4	392	250	0.00833333		4
4	392	250	1		4	392	250	0.00833333		4
4	396	250	1		4	396	250	0.00833333		4
4	397	250	1		4	397	250	0.00833333		4
4	409	250	1		4	409	250	0.00833333		4
4	410	250	1		4	410	250	0.00833333		4
4	415	250	1		4	415	250	0.00833333		4
4	420	250	1		4	420	250	0.00833333		4
4	447	250	1		4	447	250	0.00833333		4
4	455	250	1		4	455	250	0.00833333		4
4	460	250	1		4	460	250	0.00833333		4
4	465	250	1		4	465	250	0.00833333		4
4	472	250	1		4	472	250	0.00833333		4
4.08333	350	250	1		4.08333	350	250	0.00833333		4
4.08333	399	250	1		4.08333	399	250	0.00833333		4
4.08333	420	250	1		4.08333	420	250	0.00833333		4
4.08333	450	250	1		4.08333	450	250	0.00833333		4
4.08333	455	250	1		4.08333	455	250	0.00833333		4
4.08333	475	250	1		4.08333	475	250	0.00833333		4
4.08333	490	250	1		4.08333	490	250	0.00833333		4
4.08333	535	250	1		4.08333	535	250	0.00833333		4
4.16667	395	250	1		4.16667	395	250	0.00833333		4
4.16667	405	250	1		4.16667	405	250	0.00833333		4
4.16667	410	250	1		4.16667	410	250	0.00833333		4
4.16667	420	250	1		4.16667	420	250	0.00833333		4
4.16667	420	250	1		4.16667	420	250	0.00833333		4
4.16667	423.401	250	1		4.16667	423.401	250	0.00833333		4
4.16667	445	250	1		4.16667	445	250	0.00833333		4
4.16667	450	250	1		4.16667	450	250	0.00833333		4
4.16667	467.201	250	1		4.16667	467.201	250	0.00833333		4
4.16667	470	250	1		4.16667	470	250	0.00833333		4
4.25	375	250	1		4.25	375	250	0.00833333		4
4.25	415	250	1		4.25	415	250	0.00833333		4
4.25	420	250	1		4.25	420	250	0.00833333		4
4.25	455	250	1		4.25	455	250	0.00833333		4
4.33333	375	250	1		4.33333	375	250	0.00833333		4
4.33333	472	250	1		4.33333	472	250	0.00833333		4
4.41667	280	250	1		4.41667	280	250	0.00833333		4
4.41667	375	250	1		4.41667	375	250	0.00833333		4
4.41667	422	250	1		4.41667	422	250	0.00833333		4
4.41667	430	250	1		4.41667	430	250	0.00833333		4
4.41667	450	250	1		4.41667	450	250	0.00833333		4
4.41667	457	250	1		4.41667	457	250	0.00833333		4
4.41667	472	250	1		4.41667	472	250	0.00833333		4
4.41667	475	250	1		4.41667	475	250	0.00833333		4
4.5	407	250	1		4.5	407	250	0.00833333		4
4.5	440	250	1		4.5	440	250	0.00833333		4
4.5	445	250	1		4.5	445	250	0.00833333		4
4.5	453	250	1		4.5	453	250	0.00833333		4
4.5	457	250	1		4.5	457	250	0.00833333		4
4.58333	440	250	1		4.58333	440	250	0.00833333		4
4.66667	397	250	1		4.66667	397	250	0.00833333		4
4.66667	445	250	1		4.66667	445	250	0.00833333		4
4.75	395	250	1		4.75	395	250	0.00833333		4
4.75	415	250	1		4.75	415	250	0.00833333		4
4.75	431	250	1		4.75	431	250	0.00833333		4
4.75	452	250	1		4.75	452	250	0.00833333		4
4.83333	380	250	1		4.83333	380	250	0.0217391		5
4.83333	382	250	1		4.83333	382	250	0.0217391		5
4.83333	395	250	1		4.83333	395	250	0.0217391		5
4.83333	407	250	1		4.83333	407	250	0.0217391		5
4.83333	422	250	1		4.83333	422	250	0.0217391		5
4.83333	445	250	1		4.83333	445	250	0.0217391		5
4.83333	452	250	1		4.83333	452	250	0.0217391		5
4.83333	600	250	1		4.83333	600	250	0.0217391		5
4.91667	387	250	1		4.91667	387	250	0.0217391		5
4.91667	449	250	1		4.91667	449	250	0.0217391		5
4.91667	450	250	1		4.91667	450	250	0.0217391		5
4.91667	455	250	1		4.91667	455	250	0.0217391		5
4.91667	460	250	1		4.91667	460	250	0.0217391		5
4.91667	480	250	1		4.91667	480	250	0.0217391		5
4.91667	520	250	1		4.91667	520	250	0.0217391		5
4.91667	522	250	1		4.91667	522	250	0.0217391		5
5	360	250	1		5	360	250	0.0217391		5
5	411	250	1		5	411	250	0.0217391		5
5	480	250	1		5	480	250	0.0217391		5
5.08333	392	250	1		5.08333	392	250	0.0217391		5
5.08333	407	250	1		5.08333	407	250	0.0217391		5
5.08333	435	250	1		5.08333	435	250	0.0217391		5
5.08333	435	250	1		5.08333	435	250	0.0217391		5
5.08333	480	250	1		5.08333	480	250	0.0217391		5
5.08333	480	250	1		5.08333	480	250	0.0217391		5
5.08333	500	250	1		5.08333	500	250	0.0217391		5
5.08333	520	250	1		5.08333	520	250	0.0217391		5
5.08333	532	250	1		5.08333	532	250	0.0217391		5
5.08333	545	250	1		5.08333	545	250	0.0217391		5
5.16667	390	250	1		5.16667	390	250	0.0217391		5
5.16667	393	250	1		5.16667	393	250	0.0217391		5
5.16667	420	250	1		5.16667	420	250	0.0217391		5
5.16667	435	250	1		5.16667	435	250	0.0217391		5
5.16667	440	250	1		5.16667	440	250	0.0217391		5
5.16667	455.156	250	1		5.16667	455.156	250	0.0217391		5
5.16667	462	250	1		5.16667	462	250	0.0217391		5
5.16667	475	250	1		5.16667	475	250	0.0217391		5
5.16667	480	250	1		5.16667	480	250	0.0217391		5
5.16667	502	250	1		5.16667	502	250	0.0217391		5
5.16667	542	250	1		5.16667	542	250	0.0217391		5
5.25	382	250	1		5.25	382	250	0.0217391		5
5.25	507	250	1		5.25	507	250	0.0217391		5
5.5	485	250	1		5.5	485	250	0.0217391		5
5.5	525	250	1		5.5	525	250	0.0217391		5
5.66667	405	250	1		5.66667	405	250	0.0217391		5
5.75	329.231	250	1		5.75	329.231	250	0.0217391		5
5.83333	380	250	1		5.83333	380	250	0.0384615		6
5.83333	440	250	1		5.83333	440	250	0.0384615		6
5.83333	445	250	1		5.83333	445	250	0.0384615		6
5.83333	470	250	1		5.83333	470	250	0.0384615		6
5.83333	497	250	1		5.83333	497	250	0.0384615		6
5.91667	462	250	1		5.91667	462	250	0.0384615		6
5.91667	490	250	1		5.91667	490	250	0.0384615		6
5.91667	515	250	1		5.91667	515	250	0.0384615		6
6	456	250	1		6	456	250	0.0384615		6
6.08333	432	250	1		6.08333	432	250	0.0384615		6
6.08333	485	250	1		6.08333	485	250	0.0384615		6
6.08333	485	250	1		6.08333	485	250	0.0384615		6
6.08333	490	250	1		6.08333	490	250	0.0384615		6
6.08333	610	250	1		6.08333	610	250	0.0384615		6
6.16667	467	250	1		6.16667	467	250	0.0384615		6
6.16667	552	250	1		6.16667	552	250	0.0384615		6
6.25	480	250	1		6.25	480	250	0.0384615		6
6.25	485	250	1		6.25	485	250	0.0384615		6
6.25	510	250	1		6.25	510	250	0.0384615		6
6.5	420	250	1		6.5	420	250	0.0384615		6
6.5	513	250	1		6.5	513	250	0.0384615		6
6.5	540	250	1		6.5	540	250	0.0384615		6
6.5	586	250	1		6.5	586	250	0.0384615		6
6.5	599	250	1		6.5	599	250	0.0384615		6
6.75	445	250	1		6.75	445	250	0.0384615		6
6.75	527	250	1		6.75	527	250	0.0384615		6
6.83333	585	250	1		6.83333	585	250	0.0555556		7
6.83333	625	250	1		6.83333	625	250	0.0555556		7
6.91667	445	250	1		6.91667	445	250	0.0555556		7
7	410	250	1		7	410	250	0.0555556		7
7	605	250	1		7	605	250	0.0555556		7
7.08333	522	250	1		7.08333	522	250	0.0555556		7
7.08333	535	250	1		7.08333	535	250	0.0555556		7
7.08333	560	250	1		7.08333	560	250	0.0555556		7
7.16667	461	250	1		7.16667	461	250	0.0555556		7
7.16667	510	250	1		7.16667	510	250	0.0555556		7
7.16667	565	250	1		7.16667	565	250	0.0555556		7
7.16667	590	250	1		7.16667	590	250	0.0555556		7
7.25	440	250	1		7.25	440	250	0.0555556		7
7.33333	332	250	1		7.33333	332	250	0.0555556		7
7.33333	467	250	1		7.33333	467	250	0.0555556		7
7.5	565	250	1		7.5	565	250	0.0555556		7
7.5	640	250	1		7.5	640	250	0.0555556		7
7.75	445	250	1		7.75	445	250	0.0555556		7
8.16667	497	250	1		8.16667	497	250	0.125		8
8.16667	520	250	1		8.16667	520	250	0.125		8
8.25	625	250	1		8.25	625	250	0.125		8
8.33333	539	250	1		8.33333	539	250	0.125		8
8.41667	632	250	1		8.41667	632	250	0.125		8
8.5	470	250	1		8.5	470	250	0.125		8
8.5	480	250	1		8.5	480	250	0.125		8
8.5	596	250	1		8.5	596	250	0.125		8
9.25	475	250	1		9.25	475	250	0.5		9
9.25	570	250	1		9.25	570	250	0.5		9
12	680	250	1		12	680	250	0.5		12
12.25	670	250	1		12.25	670	250	0.5		12
13.1667	680	250	1		13.1667	680	250	1		13

## Sheet: Growth parameters
min_max	weight	linf	se	k	se	t0	se	neg-log likelihood	N
min250, max 600	none	628	42	0.2	0.03	-1.45	0.3
	inverse	613	108	0.2	0.07	-1.5	0.02
min250, const sigma	none	695	42	0.16	0.02	-1.68	0.32	3192.64
min250, const CV	none	724	54	0.14	0.02	-1.9	0.3	3142.08	634
min250, const CV	inv wgt	878		0.09		-3.14
no SL, const CV	none	737	57	0.14	0.02	-2.02	0.3		635
		Theoretical growth
		age	no SL	SL=250	min/max
		0	181.545	169.098	158.09
		1	254.11	241.591	243.271
		2	317.196	304.614	313.01
		3	372.04	359.403	370.108
		4	419.719	407.035	416.856
		5	461.169	448.444	455.13
		6	497.204	484.443	486.466
		7	528.532	515.739	512.122
		8	555.766	542.947	533.127
		9	579.443	566.6	550.324
		10	600.026	587.163	564.405
		11	617.921	605.04	575.933
		12	633.478	620.581	585.371
		13	647.002	634.092	593.098

[truncated: 12 more sheets: EdgeAnalysis, landings, FreqPlots_X_Age, TL-W, Margin Type, Graphs, tl_AT_AGE, VB_JP, VB_MLB, new_VB_x_area, AgeBias, GSI]
